# Supplementary material for: Azomethine ylide cycloaddition of 1,3-dienyl esters: highly regio- and diastereoselective synthesis of functionalized pyrrolidinochromenes
Source: Royal Society of Chemistry journal article supplement (doi:10.1039/d1ob02042k), 2021-12-20

# Azomethine Ylide Cycloaddition of 1,3- dienyl esters: Highly regio- and diastereoselective synthesis of functionalized pyrrolidinochromenes

Manickam Bakthadoss,<sup>\*a</sup> Mohammad Mushaf,<sup>a</sup> Vishal Agarwal,<sup>a</sup> Tadiparthi Thirupathi Reddy<sup>a</sup> and Duddu S. Sharada<sup>b</sup>

<sup>\*a</sup>*Department of Chemistry, Pondicherry University, Pondicherry-605 014, India*

<sup>b</sup>*Department of Chemistry, Indian Institute of Technology, Hyderabad, Telangana-502285, India*

*E-mail: bhakthadoss@yahoo.com*

## Supporting Information

### Table of Contents

|                                                                                                               |       |
|---------------------------------------------------------------------------------------------------------------|-------|
| 1. General Experimental Information                                                                           | 2     |
| 2. Typical experimental procedure for the synthesis of compounds 8, 10 and 11                                 | 2-3   |
| 3. Analytical Data of the Products                                                                            | 3-17  |
| 4. <sup>1</sup> H and <sup>13</sup> C NMR spectra for the compounds ( <b>8a-v</b> , <b>10</b> and <b>11</b> ) | 18-66 |

## EXPERIMENTAL SECTION

### General Information and Materials

Commercial reagents were used without further purification. IR spectra were recorded on a Perkin Elmer-FTIR spectrometer using solid samples as KBr plates. For compounds  $^1\text{H}$  NMR (400 MHz,  $\text{CDCl}_3$ ) and  $^{13}\text{C}$  NMR (100 MHz,  $\text{CDCl}_3$ ) spectra were recorded in deuteriochloroform ( $\text{CDCl}_3$ ) on a Bruker 400 MHz spectrometer using tetramethylsilane (TMS,  $\delta = 0$ ) as an internal standard at room temperature. Mass spectra were recorded on Agilent 1200 LC/MS-6110 mass spectrometer. The structures of all compounds (**8a-v**, **10** and **11**) were confirmed by  $^1\text{H}$  NMR,  $^{13}\text{C}$  NMR spectrometry, and ESI-HRMS spectrometry. Spectral data of  $^1\text{H}$ ,  $^{13}\text{C}$  NMR and ESI-HRMS of all compounds (**8a-v**, **10** and **11**) are listed below.

Starting material **3a-c** and **4a-c** prepared by known procedure<sup>1,2</sup>

### General Procedure for the Synthesis of compound (**6a-o**):

To a 25mL round bottom flask was added 2-hydroxyarylaldehyde **4** (1 mmol),  $\text{K}_2\text{CO}_3$  (3.0 mmol), methyl (2*Z*,4*E*)-2-(bromomethyl)-5-phenylpenta-2,4-dienoate **5** (1 mmol) and acetonitrile (5 mL). The RB was stirred at room temperature for 3 hours. After the completion of the reaction as indicated by the TLC, EtOAc (10 mL) was added to the reaction mixture which was extracted with EtOAc and water ( $3 \times 10$  mL). The combined organic layers were washed with brine (10 mL), dried over  $\text{Na}_2\text{SO}_4$ , and filtered. The solvent was removed under reduced pressure, and the crude product was purified by silica gel chromatography (2:8; Ethyl Acetate/Hexane) to afford the product **6a-o** as solids.

### General Procedure for the Synthesis of compounds (**8a-v**):

To a 25mL round bottom flask was added 1,3-diolefin aldehyde **6a** (0.3 mmol), N-methyl glycine ester **7a** (1.2 mmol),  $\text{Et}_3\text{N}$  (30 mol %) and toluene (5 mL) and the RB was kept under  $\text{N}_2$  balloon at reflux for 8 hours. After the completion of the reaction as indicated

by the TLC, EtOAc (10 mL) was added to the reaction mixture which was extracted with EtOAc and water ( $3 \times 10$  mL). The combined organic layers were washed with brine (10 mL), dried over  $\text{Na}_2\text{SO}_4$ , and filtered. The solvent was removed under reduced pressure, and the crude product was purified by silica gel chromatography (1:8; Ethyl Acetate/Hexane) to afford the product **8a** as white color solid.

**Typical experimental procedure for the synthesis of compound (10):**

To a 25mL round bottom flask was added 1,3-diolefin aldehyde **8n** (0.2 mmol), pipercolinic acid **9** (0.8 mmol) and ethanol (5 mL) and the RB was kept at reflux for 12 hours. After the completion of the reaction as indicated by the TLC, EtOAc (10 mL) was added to the reaction mixture which was extracted with EtOAc and water ( $3 \times 10$  mL). The combined organic layers were washed with brine (10 mL), dried over  $\text{Na}_2\text{SO}_4$ , and filtered. The solvent was removed under reduced pressure, and the crude product was purified by silica gel chromatography (4:6; Ethyl Acetate/Hexane) to afford the product **10** as white color solid.

**Typical experimental procedure for the synthesis of compound (8):**

To a 25mL round bottom flask was added tricyclic compound **8a** (0.2 mmol),  $\text{NaBH}_4$  (3 equiv.) in a mixture of THF: Methanol solvent system (5 mL, 1:1) and the RB were kept at reflux for 12 hours under  $\text{N}_2$  balloon. After the completion of the reaction as indicated by the TLC, EtOAc (10 mL) was added to the reaction mixture which was extracted with EtOAc and water ( $3 \times 10$  mL). The combined organic layers were washed with brine (10 mL), dried over  $\text{Na}_2\text{SO}_4$ , and filtered. The solvent was removed under reduced pressure, and the crude product was purified by silica gel chromatography (4:6; Ethyl Acetate/Hexane) to afford the product **11** as colorless oil

**Dimethyl (*E*)-3-styryl-1,2,3,9b-tetrahydrochromeno[4,3-b]pyrrole-2,3a(4*H*)-dicarboxylate (8a)**

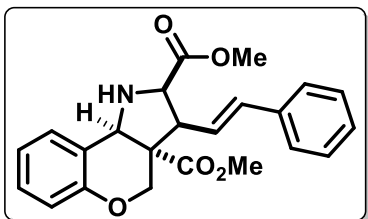

Physical state :White solid, yield : 91% (107 mg), M. P: 126-128 °C ; <sup>1</sup>H NMR (400 MHz, CDCl<sub>3</sub>) δ 7.40 (d, J = 7.6 Hz, 1H), 7.32 (d, J = 4.3 Hz, 4H), 7.29 – 7.23 (m, 2H), 7.24 – 7.18 (m, 1H), 6.97 (t, J = 7.5 Hz, 1H), 6.91 (d, J = 8.3 Hz, 1H), 6.55 (d, J = 15.4 Hz, 1H), 5.83 (dd, J = 15.4, 10.9 Hz, 1H), 4.58 (s, 1H), 4.51 (d, J = 11.3 Hz, 1H), 4.24 (d, J = 9.7 Hz, 1H), 4.00 (d, J = 11.2 Hz, 1H), 3.72 (s, 3H), 3.68 (d, J = 9.9 Hz, 1H), 3.63 (s, 3H). <sup>13</sup>C NMR (CDCl<sub>3</sub>, 100 MHz): δ 173.1, 172.2, 154.3, 136.4, 136.0, 130.8, 129.3, 128.8, 128.2, 126.6, 121.4, 121.2, 120.7, 117.3, 64.3, 63.7, 59.5, 55.7, 55.3, 52.8, 52.4. HRMS (ESI): Calc. For C<sub>23</sub>H<sub>24</sub>NO<sub>5</sub> [M+H]<sup>+</sup> 394.1654, measured 394.1647.

**3a-Ethyl 2-methyl (*E*)-3-styryl-1,2,3,9b-tetrahydrochromeno[4,3-b]pyrrole-2,3a(4*H*)-dicarboxylate (8b)**

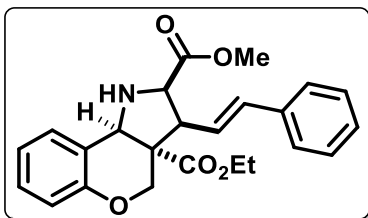

Physical state: White solid, Yield: 89% (111 mg) , M. P (°C) :124-126 ,<sup>1</sup>H NMR (CDCl<sub>3</sub>, 400 MHz): δ 7.63 – 7.11 (m, 7H), 7.13 – 6.65 (m, 2H), 6.56 (d, J = 15.4 Hz, 1H), 5.84 (dd, J = 15.4, 10.9 Hz, 1H), 4.61 (s, 1H), 4.53 (d, J = 11.2 Hz, 1H), 4.23-4.28 (m, 3H), 4.01 (d, J = 11.2 Hz, 1H), 3.72 (d, J = 10.5 Hz, 1H), 3.67 (s, 3H), 2.44 (s, 1H), 1.23 (t, J = 7.2 Hz, 3H). <sup>13</sup>C NMR (CDCl<sub>3</sub>, 100 MHz): δ 172.4, 172.2, 154.3, 136.4, 136.0, 130.8, 129.3, 128.8, 128.2, 126.5, 121.4, 121.2, 120.6, 117.2, 64.3, 63.5, 61.6, 59.2, 55.6, 55.2, 52.5, 14.3. HRMS (ESI): Calc. for C<sub>24</sub>H<sub>26</sub>NO<sub>5</sub> [M+H]<sup>+</sup> 408.1811, measured 408.1807.

**Dimethyl (*E*)-6,8-dichloro-3-styryl-1,2,3,9b-tetrahydrochromeno[4,3-b]pyrrole-2,3a(4*H*)-dicarboxylate (8c):**

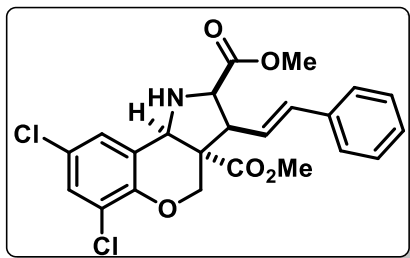

Physical state: White solid, Yield: 90% (125 mg), M. P (°C) :140-142, <sup>1</sup>H NMR (400 MHz, CDCl<sub>3</sub>) δ 7.36 – 7.25 (m, 7H), 6.55 (d, *J* = 15.4 Hz, 1H), 5.78 (dd, *J* = 15.4, 10.8 Hz, 1H), 4.65 (dd, *J* = 11.3, 1.5 Hz, 1H), 4.53 (s, 1H), 4.21 (d, *J* = 9.7 Hz, 1H), 4.03 (d, *J* = 11.4 Hz, 1H), 3.73 (s, 3H), 3.69 (d, *J* = 2.6 Hz, 1H), 3.64 (s, 3H), 2.69 (s, 1H). <sup>13</sup>C NMR (100 MHz, CDCl<sub>3</sub>) δ 172.5, 172.1, 149.1, 136.4, 136.2, 129.6, 129.0, 128.9, 128.4, 126.6, 126.1, 123.6, 123.0, 120.5, 65.2, 63.4, 58.9, 55.2, 54.9, 53.0, 52.6. HRMS (ESI): Calc. For C<sub>23</sub>H<sub>22</sub>Cl<sub>2</sub>NO<sub>5</sub> [M+H]<sup>+</sup> 462.0875, measured 462.0876.

**Dimethyl (*E*)-6-ethoxy-3-styryl-1,2,3,9b-tetrahydrochromeno[4,3-b]pyrrole-2,3a(4*H*)-dicarboxylate (8d)**

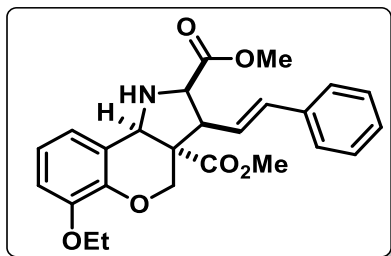

Physical state: White solid, Yield: 82 % (108 mg), M. P (°C) :128-130, <sup>1</sup>H NMR (400 MHz, CDCl<sub>3</sub>): δ 7.34 – 6.82 (m, 7H), 6.55 (d, *J* = 15.4 Hz, 1H), 5.78 (dd, *J* = 15.4, 10.8 Hz, 1H), 4.67 (s, 1H), 4.65 (d, *J* = 1.3 Hz, 1H), 4.21 (d, *J* = 9.7 Hz, 1H), 4.03 (d, *J* = 11.4 Hz, 1H), 3.74 – 3.72 (m, 4H). 3.65 (s, 3H) 3.63 (d, *J* = 5.7 Hz, 1H). <sup>13</sup>C NMR (CDCl<sub>3</sub>, 100 MHz): δ 172.8, 171.8, 148.0, 144.2, 136.3, 136.2, 128.8, 128.2, 126.6, 122.3, 121.3, 121.2, 120.8, 112.5, 64.8, 64.5, 63.3, 59.0, 55.1, 55.0, 52.9, 52.6, 14.9, HRMS (ESI): Calc. for C<sub>25</sub>H<sub>28</sub>NO<sub>6</sub> [M+H]<sup>+</sup> 438.1917, measured 438.1916



130.0, 129.4, 128.9, 128.4, 128.2, 127.1, 126.6, 124.0, 123.7, 121.1, 118.7, 112.7, 63.8, 63.7, 57.6, 55.6, 54.9, 52.8, 52.5. HRMS (ESI): Calc. for C<sub>27</sub>H<sub>26</sub>NO<sub>5</sub> [M+H]<sup>+</sup> 444.1811, measured 444.1812

**2-Ethyl 3a-methyl (*E*)-3-styryl-1,2,3,9b-tetrahydrochromeno[4,3-b]pyrrole-2,3a(4*H*)-dicarboxylate (8g)**

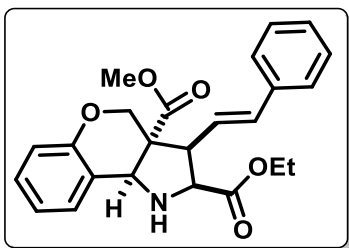

Physical state: White solid, Yield: 84% (103 mg), M. P (°C) :124-126, <sup>1</sup>H NMR (400 MHz, CDCl<sub>3</sub>) δ 7.43 (dd, *J* = 7.6, 1.7 Hz, 2H), 7.37 – 7.19 (m, 6H), 7.04 – 6.89 (m, 2H), 6.56 (d, *J* = 15.4 Hz, 1H), 5.86 (dd, *J* = 15.4, 10.9 Hz, 1H), 4.60 (d, *J* = 1.5 Hz, 1H), 4.54 (dd, *J* = 11.3, 1.5 Hz, 1H), 4.23 (d, *J* = 9.7 Hz, 1H), 4.12 (q, *J* = 7.2 Hz, 2H), 4.02 (d, *J* = 11.2 Hz, 1H), 3.74 (s, 3H), 3.71 (d, *J* = 10.3 Hz, 1H), 2.70 (s, 1H), 1.10 (t, *J* = 7.1 Hz, 3H). <sup>13</sup>C NMR (CDCl<sub>3</sub>, 100 MHz): δ 173.1, 171.8, 154.3, 136.4, 135.9, 130.9, 129.3, 128.8, 128.2, 126.5, 121.5, 121.3, 120.8, 117.3, 64.3, 63.7, 61.6, 59.5, 55.8, 55.4, 52.8, 14.3. HRMS (ESI): Calc. for C<sub>24</sub>H<sub>26</sub>NO<sub>5</sub> [M+H]<sup>+</sup> 408.1811, measured 408.1807.

**Dimethyl (*E*)-6,8-dibromo-3-styryl-1,2,3,9b-tetrahydrochromeno[4,3-b]pyrrole-2,3a(4*H*)-dicarboxylate (8h)**

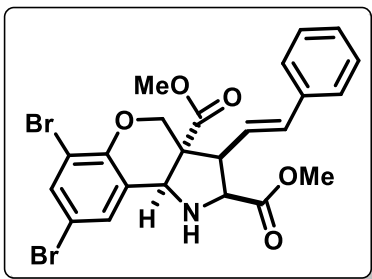

Physical state: White solid, Yield: 95% (153 mg), M. P (°C) :142-144, <sup>1</sup>H NMR (400 MHz, CDCl<sub>3</sub>) δ 7.62 (d, *J* = 2.3 Hz, 1H), 7.51 (d, *J* = 2.3 Hz, 1H), 7.38 – 7.25 (m, 5H), 6.57 (d, *J* = 15.4 Hz, 1H), 5.80 (dd, *J* = 15.4, 10.8 Hz, 1H), 4.66 (dd, *J* = 11.3, 1.5 Hz, 1H), 4.56 (s, 1H), 4.23 (d, *J* = 9.6 Hz, 1H), 4.06 (d, *J* = 11.3 Hz, 1H), 3.75 (s, 3H), 3.71 (d, *J* = 10.2 Hz, 1H), 3.66 (s, 3H), 2.73 (s, 1H). <sup>13</sup>C NMR (CDCl<sub>3</sub>, 100 MHz): δ 172.5, 172.1, 150.5, 136.4, 136.3, 135.1, 132.6, 128.9, 128.3, 126.6, 124.0, 120.6, 113.4, 112.1, 65.3, 63.4, 58.9, 55.2, 55.0, 53.0, 52.6. HRMS (ESI): Calc. for C<sub>23</sub>H<sub>22</sub>Br<sub>2</sub>NO<sub>5</sub> [M+H]<sup>+</sup> 551.9844, measured 551.9852.

**2-Ethyl 3a-methyl (*E*)-6,8-dibromo-3-styryl-1,2,3,9b-tetrahydrochromeno[4,3-*b*]pyrrole-2,3a(4*H*)-dicarboxylate (8i)**

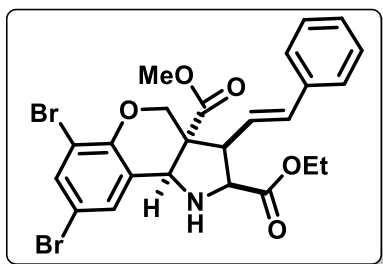

Physical state: White solid, Yield: 93 % (157 mg), M. P (°C) :144-146, <sup>1</sup>H NMR (400 MHz, CDCl<sub>3</sub>) δ 7.61 (d, *J* = 2.3 Hz, 1H), 7.52 (d, *J* = 2.3 Hz, 1H), 7.37 – 7.25 (m, 5H), 6.57 (d, *J* = 15.4 Hz, 1H), 5.81 (dd, *J* = 15.5, 10.9 Hz, 1H), 4.67 (dd, *J* = 11.3, 1.5 Hz, 1H), 4.56 (d, *J* = 1.4 Hz, 1H), 4.20 (d, *J* = 9.7 Hz, 1H), 4.12 (dd, *J* = 7.1, 2.8 Hz, 2H), 4.06 (d, *J* = 11.3 Hz, 1H), 3.75 (s, 3H) 3.69 (d, *J* = 10.2 Hz, 1H), 1.09 (t, *J* = 7.1 Hz, 3H). <sup>13</sup>C NMR (CDCl<sub>3</sub>,100 MHz):δ 172.5, 171.5, 150.5, 136.3, 136.2, 135.1, 132.6, 128.8, 128.6, 126.5, 124.0, 120.7, 113.4, 112.0, 65.3, 63.3, 61.7, 58.9, 55.2, 55.0, 53.0, 14.2. HRMS (ESI): Calc. for C<sub>23</sub>H<sub>22</sub>Br<sub>2</sub>NO<sub>5</sub> [M+H]<sup>+</sup> 564.0021, measured 564.0030.

**2-Ethyl 3a-methyl (*E*)-3-styryl-1,2,3,11c-tetrahydrobenzo[5,6]chromeno[4,3-*b*]pyrrole-2,3a(4*H*)-dicarboxylate (8j)**



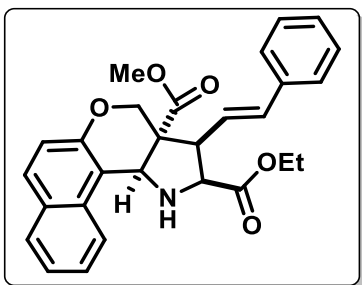

Physical state: White solid, Yield: 83% (114 mg), M. P (°C) :130-132,  $^1\text{H}$  NMR ( $\text{CDCl}_3$ , 400 MHz):  $\delta$  8.34 (d,  $J = 8.4$  Hz, 1H), 7.82 – 7.73 (m, 2H), 7.61 – 7.28 (m, 6H), 7.15 (d,  $J = 8.9$  Hz, 1H), 6.63 (d,  $J = 15.4$  Hz, 1H), 5.91 (dd,  $J = 15.4, 11.0$  Hz, 1H), 5.06 (s, 1H), 4.70 (dd,  $J = 11.2, 1.6$  Hz, 1H), 4.39 (d,  $J = 10.2$  Hz, 1H), 4.23 (d,  $J = 11.2$  Hz, 1H), 4.14 (q,  $J = 7.1$  Hz, 2H), 3.86 (t,  $J = 10.6$  Hz, 1H), 3.72 (s, 3H), 2.95 (s, 1H), 1.12 (t,  $J = 7.1$  Hz, 3H).  $^{13}\text{C}$  NMR ( $\text{CDCl}_3$ , 100 MHz):  $\delta$  172.9, 172.2, 152.1, 136.3, 136.0, 133.5, 130.0, 129.3, 128.8, 128.3, 128.2, 127.1, 126.5, 124.0, 123.7, 121.3, 118.6, 112.7, 63.8, 63.7, 61.6, 57.6, 55.7, 54.9, 52.8, 14.3. HRMS (ESI): Calc. for  $\text{C}_{28}\text{H}_{28}\text{NO}_5$   $[\text{M}+\text{H}]^+$  458.1967, measured 458.1969.

**2-Ethyl 3a-methyl (E)-8-chloro-3-styryl-1,2,3,9b-tetrahydrochromeno[4,3-b]pyrrole-2,3a(4H)-dicarboxylate (8k):**

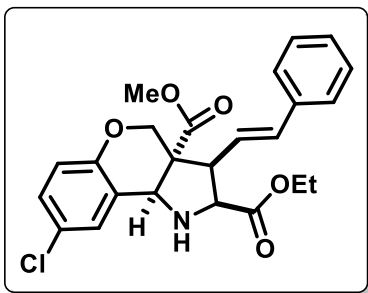

Physical state: White solid, Yield: 79% (105 mg), M. P (°C) :128-130,  $^1\text{H}$  NMR ( $\text{CDCl}_3$ , 400 MHz):  $\delta$  7.42 (d,  $J = 2.6$  Hz, 1H), 7.37 – 7.25 (m, 5H), 7.18 (dd,  $J = 8.8, 2.5$  Hz, 1H), 6.86 (d,  $J = 8.8$  Hz, 1H), 6.57 (d,  $J = 15.4$  Hz, 1H), 5.83 (dd,  $J = 15.4, 10.9$  Hz, 1H), 4.56 (s, 1H), 4.53 (d,  $J = 11.3$  Hz, 1H), 4.23 (d,  $J = 9.8$  Hz, 1H), 4.13 (qd,  $J = 7.1, 1.2$  Hz, 2H), 4.00 (d,  $J = 11.2$  Hz, 1H), 3.74 (s, 3H), 3.70 (d,  $J = 10.3$  Hz, 1H), 2.71 (s, 1H), 1.10 (t,  $J = 7.1$  Hz, 3H).  $^{13}\text{C}$  NMR ( $\text{CDCl}_3$ , 100 MHz):  $\delta$  172.7, 171.6, 152.9, 136.2,

136.2, 130.4, 129.4, 128.8, 128.3, 126.5, 126.3, 122.1, 120.9, 118.7, 64.5, 63.4, 61.8, 59.0, 55.4, 55.0, 52.9, 14.3. HRMS (ESI): Calc. for  $C_{24}H_{25}ClNO_5$   $[M+H]^+$  442.1421, measured 442.1419.

**2-Ethyl 3a-methyl (E)-6,8-dichloro-3-styryl-1,2,3,9b-tetrahydrochromeno[4,3-b]pyrrole-2,3a(4H)-dicarboxylate (8l)**

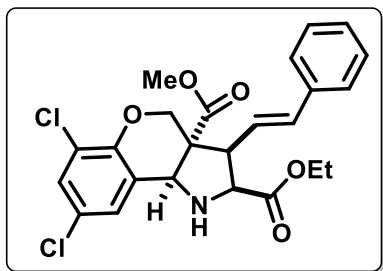

Physical state: White solid, Yield: 86 % (123 mg), M. P ( $^{\circ}C$ ) :134-136,  $^1H$  NMR ( $CDCl_3$ , 400 MHz):  $\delta$  7.36 – 7.28 (m, 7H), 6.58 (d,  $J$  = 15.5 Hz, 1H), 5.82 (dd,  $J$  = 15.4, 10.9 Hz, 1H), 4.67 (dd,  $J$  = 11.3, 1.4 Hz, 1H), 4.57 (s, 1H), 4.21 (d,  $J$  = 9.6 Hz, 1H), 4.12 (qd,  $J$  = 7.1, 2.2 Hz, 2H), 4.06 (d,  $J$  = 11.3 Hz, 1H), 3.75 (s, 3H), 3.70 (d,  $J$  = 10.2 Hz, 1H) 2.64 (s, 1H), 1.10 (t,  $J$  = 7.1 Hz, 3H).  $^{13}C$  NMR ( $CDCl_3$ , 100 MHz):  $\delta$  172.5, 171.5, 149.1, 136.3, 136.2, 129.6, 129.0, 128.8, 128.3, 126.5, 126.1, 123.5, 122.9, 120.6, 65.2, 63.3, 61.8, 58.9, 55.2, 54.9, 53.0, 14.3. HRMS (ESI): Calc. for  $C_{24}H_{24}Cl_2NO_5$   $[M+H]^+$  476.1032, measured 476.1031

**2-Ethyl 3a-methyl (E)-6-methoxy-3-styryl-1,2,3,9b-tetrahydrochromeno[4,3-b]pyrrole-2,3a(4H)-dicarboxylate (8m)**

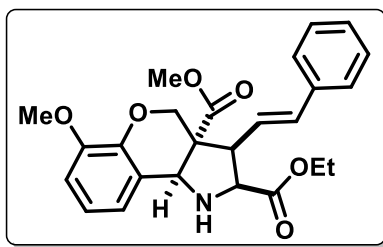

Physical state: White solid, Yield: 88% (115 mg), M. P ( $^{\circ}C$ ) : 122-124,  $^1H$  NMR (400 MHz,  $CDCl_3$ )  $\delta$  7.47 (d,  $J$  = 7.1 Hz, 1H), 7.30 (d,  $J$  = 11.0 Hz, 5H), 7.25 – 7.18 (m, 1H), 7.02 – 6.88 (m, 2H), 6.55 (d,  $J$  = 15.4 Hz, 1H), 5.82 (dd,  $J$  = 15.4, 10.9 Hz, 1H), 4.68 (s, 1H), 4.53 (d,  $J$  = 11.1 Hz, 1H), 4.28 (d,  $J$  = 9.7 Hz, 1H), 4.23 – 4.09 (m, 4H), 3.99 (d,  $J$  = 11.3 Hz, 1H), 3.72 (t,  $J$  = 10.3 Hz, 1H),

2.87s, 1H), 1.21 (t,  $J = 7.1$  Hz, 3H), 1.09 (t,  $J = 7.1$  Hz, 3H).  $^{13}\text{C}$  NMR ( $\text{CDCl}_3$ , 100 MHz):  $\delta$  173.0, 171.6, 148.6, 143.9, 136.4, 136.0, 128.8, 128.1, 126.5, 122.4, 121.7, 121.2, 121.2, 110.9, 64.8, 63.6, 61.6, 59.2, 56.0, 55.6, 55.2, 52.8, 14.3 HRMS (ESI): Calc. for  $\text{C}_{25}\text{H}_{28}\text{NO}_6$   $[\text{M}+\text{H}]^+$  438.1917, measured 438.1918.

**Diethyl (*E*)-3-styryl-1,2,3,9b-tetrahydrochromeno[4,3-*b*]pyrrole-2,3a(4*H*)-dicarboxylate (8n)**

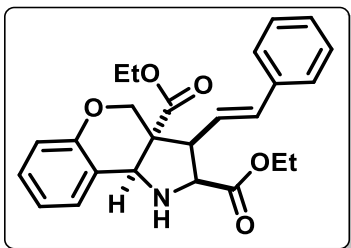

Physical state: White solid, Yield: 80% (100 mg), M. P ( $^{\circ}\text{C}$ ) :122-124,  $^1\text{H}$  NMR ( $\text{CDCl}_3$ , 400 MHz):  $\delta$  7.47 (d,  $J = 7.1$  Hz, 1H), 7.40 – 7.20 (m, 5H), 7.00 – 6.90 (m, 2H), 6.55 (d,  $J = 15.4$  Hz, 1H), 4.68 (s, 1H), 4.53 (d,  $J = 11.1$  Hz, 1H), 4.28 (d,  $J = 9.7$  Hz, 1H), 4.24-4.09 (m, 4H), 3.99 (d,  $J = 11.3$  Hz, 1H), 3.72 (t,  $J = 10.3$  Hz, 1H), 1.21 (t,  $J = 7.1$  Hz, 3H), 1.09 (t,  $J = 7.1$  Hz, 3H).  $^{13}\text{C}$  NMR ( $\text{CDCl}_3$ , 100 MHz): $\delta$  172.0, 171.4, 154.33, 136.3, 136.2, 129.6, 128.8, 128.3, 126.3, 121.6, 120.9, 119.9, 117.3, 64.2, 63.1, 62.00, 61.90, 61.7, 59.1, 55.2, 55.03, 29.84, 14.9. HRMS (ESI): Calc. for  $\text{C}_{25}\text{H}_{27}\text{NO}_5$   $[\text{M}+\text{H}]^+$  422.1967, measured 422.1965.

**Ethyl 2-methyl (*E*)-8-bromo-3-styryl-1,2,3,9b-tetrahydrochromeno[4,3-*b*]pyrrole-2,3a(4*H*)-dicarboxylate (8o)**

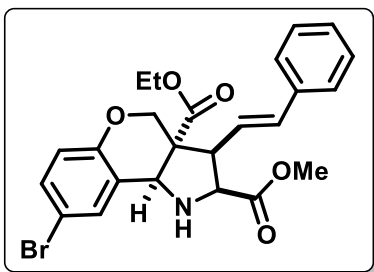

Physical state: White solid, Yield: 89 % (124 mg), M. P ( $^{\circ}\text{C}$ ) : 130-132,  $^1\text{H}$  NMR ( $\text{CDCl}_3$ , 400 MHz):  $\delta$  7.48 (d,  $J = 2.4$  Hz, 1H), 7.28 – 7.21 (m, 6H), 6.74 (d,  $J = 8.7$  Hz, 1H), 6.49 (d,  $J = 15.4$  Hz, 1H), 5.74 (dd,  $J = 15.4, 10.9$  Hz, 1H), 4.45 (dd,  $J = 13.2, 2.0$  Hz,

2H), 4.20 – 4.09 (m, 2H), 3.91 (d,  $J = 11.1$  Hz, 1H), 3.63 (d,  $J = 12$  Hz, 1H), 3.60 (s, 3H), 2.52 (s, 1H), 1.16 (t,  $J = 7.1$  Hz, 3H).  $^{13}\text{C}$  NMR ( $\text{CDCl}_3$ , 100 MHz): $\delta$  172.2, 172.1, 153.5, 136.3, 136.2, 133.4, 132.2, 128.9, 128.3, 126.5, 122.8, 120.9, 119.1, 113.5, 64.5, 63.4, 61.7, 58.8, 55.3, 54.9, 52.5, 14.3. HRMS (ESI): Calc. for  $\text{C}_{24}\text{H}_{24}\text{BrNO}_5$   $[\text{M}+\text{H}]^+$  486.0916, measured 486.0909.

**Ethyl 2-methyl (*E*)-6,8-dichloro-3-styryl-1,2,3,9b-tetrahydrochromeno[4,3-b]pyrrole-2,3a(4*H*)-dicarboxylate (8p)**

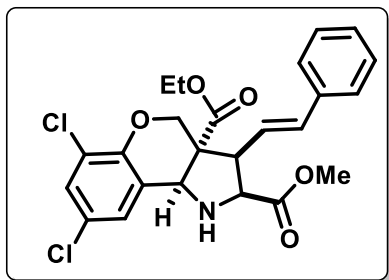

Physical state: White solid, Yield: 87 % (127 mg), M. P ( $^{\circ}\text{C}$ ) : 134-136,  $^1\text{H}$  NMR (400 MHz,  $\text{CDCl}_3$ )  $\delta$  7.34 – 7.27 (m, 7H), 6.56 (d,  $J = 15.4$  Hz, 1H), 5.78 (dd,  $J = 15.4, 10.9$  Hz, 1H), 4.64 (d,  $J = 11.3$  Hz, 1H), 4.53 (s, 1H), 4.24 - 4.15 (m, 3H), 4.03 (d,  $J = 11.3$  Hz, 1H), 3.69 (d,  $J = 10.3$  Hz, 1H), 3.65 (s, 3H), 2.64 (s, 1H), 1.21 (t,  $J = 7.1$  Hz, 3H).  $^{13}\text{C}$  NMR (100 MHz,  $\text{CDCl}_3$ )  $\delta$  172.0, 171.7, 149.0, 136.4, 136.1, 129.5, 128.9, 128.8, 128.2, 126.4, 125.9, 123.5, 122.8, 120.5, 65.1, 63.2, 61.7, 58.7, 55.0, 54.7, 52.5, 14.2. HRMS (ESI): Calc. for  $\text{C}_{24}\text{H}_{23}\text{Cl}_2\text{NO}_5$   $[\text{M}+\text{H}]^+$  476.1031 measured 476.1029.

**Diethyl (*E*)-6,8-dichloro-3-styryl-1,2,3,9b-tetrahydrochromeno[4,3-b]pyrrole-2,3a(4*H*)-dicarboxylate (8q)**

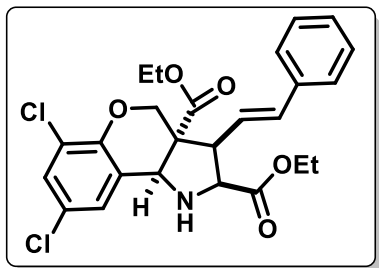

Physical state: White solid, Yield: 84 % (111 mg), M. P (°C) : 134-136,  $^1\text{H}$  NMR (400 MHz,  $\text{CDCl}_3$ )  $\delta$  7.33 – 7.26 (m, 7H), 6.56 (d,  $J$  = 15.4 Hz, 1H), 5.79 (dd,  $J$  = 15.4, 10.9 Hz, 1H), 4.65 (dd,  $J$  = 11.3, 1.0 Hz, 1H), 4.54 (s, 1H), 4.25 – 4.09 (m, 4H), 4.03 (d,  $J$  = 11.3 Hz, 1H), 3.69 (t,  $J$  = 10.3 Hz, 1H), 2.56 (bs, 1H), 1.21 (t,  $J$  = 7.1 Hz, 3H), 1.09 (t,  $J$  = 7.1 Hz, 3H);  $^{13}\text{C}$  NMR (100 MHz,  $\text{CDCl}_3$ )  $\delta$  171.8, 171.6, 149.1, 136.4, 136.2, 129.6, 129.0, 128.8, 128.3, 126.5, 126.0, 123.5, 122.9, 120.7, 65.2, 63.2, 61.8, 61.8, 58.7, 55.1, 54.8, 14.3. HRMS (ESI): Calc. for  $\text{C}_{25}\text{H}_{25}\text{ClNO}_5$   $[\text{M}+\text{H}]^+$  490.1188, measured 490.1186.

**Diethyl (*E*)-8-chloro-3-styryl-1,2,3,9b-tetrahydrochromeno[4,3-b]pyrrole-2,3a(4*H*)-dicarboxylate (8r)**

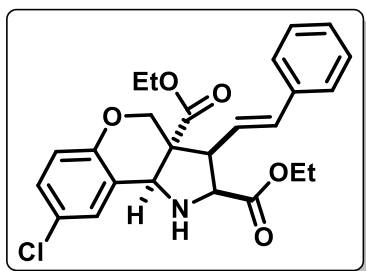

Physical state: White solid, Yield: 87 % (139 mg), M. P (°C) : 128-130,  $^1\text{H}$  NMR ( $\text{CDCl}_3$ , 400 MHz):  $\delta$  7.40 (d,  $J$  = 2.5 Hz, 1H), 7.32 – 7.27 (m, 5H), 7.15 (dd,  $J$  = 8.8, 2.6 Hz, 1H), 6.84 (d,  $J$  = 8.8 Hz, 1H), 6.54 (d,  $J$  = 15.4 Hz, 1H), 5.80 (dd,  $J$  = 15.4, 10.9 Hz, 1H), 4.51 (dd,  $J$  = 13.6, 2.3 Hz, 2H), 4.30 – 4.05 (m, 5H), 3.96 (d,  $J$  = 11.2 Hz, 1H), 3.68 (t,  $J$  = 10.3 Hz, 1H), 2.59 (s, 1H), 1.21 (t,  $J$  = 7.1 Hz, 3H), 1.09 (t,  $J$  = 7.1 Hz, 3H).  $^{13}\text{C}$  NMR ( $\text{CDCl}_3$ , 100 MHz):  $\delta$  172.1, 171.7, 153.0, 136.3, 136.1, 130.4, 129.4, 128.8, 128.2, 126.5, 126.2, 122.2, 121.0, 118.7, 64.5, 63.4, 61.7, 61.7, 58.9, 55.4, 54.9, 14.4. HRMS (ESI): Calc. for  $\text{C}_{25}\text{H}_{26}\text{ClNO}_6$   $[\text{M}+\text{H}]^+$  456.1578, measured 456.1581.

**Butyl 2-methyl (*E*)-3-styryl-1,2,3,9b-tetrahydrochromeno[4,3-b]pyrrole-2,3a(4*H*)-dicarboxylate (8s)**

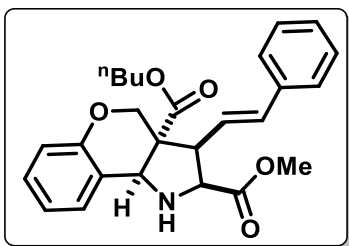

Physical state: White solid, Yield: 87% (112 mg), M. P (°C) :130-132,  $^1\text{H}$  NMR ( $\text{CDCl}_3$ , 400 MHz):  $\delta$  7.41 (dd,  $J = 7.6, 1.3$  Hz, 1H), 7.33 – 7.27 (m, 5H), 7.23 – 7.16 (m, 1H), 6.97 (td,  $J = 7.5, 1.0$  Hz, 1H), 6.90 (d,  $J = 8.2$  Hz, 1H), 6.54 (d,  $J = 15.4$  Hz, 1H), 5.82 (dd,  $J = 15.4, 10.9$  Hz, 1H), 4.58 (s, 1H), 4.51 (dd,  $J = 11.2, 1.2$  Hz, 1H), 4.25 (d,  $J = 9.8$  Hz, 1H), 4.19 – 4.06 (m, 2H), 4.00 (d,  $J = 11.2$  Hz, 1H), 3.70 (t,  $J = 10.3$  Hz, 1H), 3.64 (s, 3H), 2.48 (s, 1H), 1.55 (dd,  $J = 9.7, 6.6$  Hz, 2H), 1.31 – 1.22 (m, 2H), 0.82 (t,  $J = 7.4$  Hz, 3H).  $^{13}\text{C}$  NMR ( $\text{CDCl}_3$ , 100 MHz):  $\delta$  172.3, 172.1, 154.2, 136.3, 136.0, 130.8, 129.2, 128.7, 128.1, 126.4, 121.3, 121.1, 120.4, 117.1, 65.3, 64.2, 63.4, 59.2, 55.5, 55.1, 52.4, 30.5, 19.0, 13.6. HRMS (ESI): Calc. for  $\text{C}_{26}\text{H}_{29}\text{NO}_5$   $[\text{M}+\text{H}]^+$  436.2124, measured 436.2120.

**Butyl 2-ethyl (*E*)-3-styryl-1,2,3,9b-tetrahydrochromeno[4,3-b]pyrrole-2,3a(4*H*)-dicarboxylate (8t)**

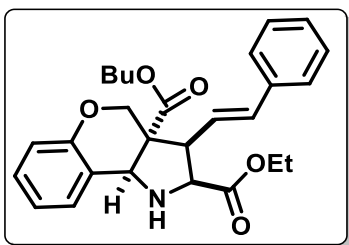

Physical state: White solid, Yield: 92% (124 mg), M. P (°C) :128-130,  $^1\text{H}$  NMR ( $\text{CDCl}_3$ , 400 MHz):  $\delta$  8.18 – 7.17 (m, 4H), 7.17 – 6.87 (m, 1H), 6.57 (d,  $J = 15.4$  Hz, 1H), 5.86 (dd,  $J = 15.5, 10.9$  Hz, 1H), 4.60 (s, 1H), 4.54 (dd,  $J = 11.2, 1.4$  Hz, 1H), 4.34 – 4.00 (m, 4H), 3.73 (t,  $J = 10.4$  Hz, 1H), 2.61 (s, 1H), 1.80 – 1.49 (m, 2H), 1.42 – 1.25 (m, 2H), 1.11 (t,  $J = 7.1$  Hz, 3H), 0.84 (t,  $J = 7.4$  Hz, 3H).  $^{13}\text{C}$  NMR ( $\text{CDCl}_3$ , 100 MHz):  $\delta$  172.4, 171.7, 154.2, 136.2, 135.9, 130.8, 129.2, 128.7, 128.1, 126.4, 121.3, 121.2, 120.5, 117.1, 65.3, 64.2, 63.4, 61.6, 59.3, 55.5, 55.2, 30.6, 19.0, 14.2, 13.6. HRMS (ESI): Calc. for  $\text{C}_{27}\text{H}_{31}\text{NO}_5$   $[\text{M}+\text{H}]^+$  450.2280, measured 450.2279.

**Butyl 2-methyl (*E*)-8-bromo-3-styryl-1,2,3,9b-tetrahydrochromeno[4,3-b]pyrrole 2,3a(4*H*)- dicarboxylate (8u)**

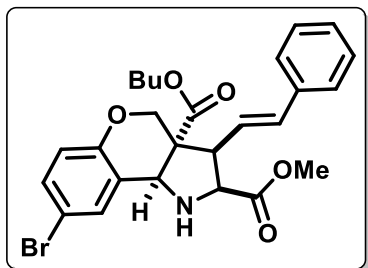

Physical state: White solid, Yield: 82% (121 mg), M. P (°C) :134-136, <sup>1</sup>H NMR (CDCl<sub>3</sub>, 400 MHz): δ 7.56 (d, *J* = 2.2 Hz, 1H), 7.37 – 7.26 (m, 6H), 6.79 (d, *J* = 8.8 Hz, 1H), 6.55 (d, *J* = 15.4 Hz, 1H), 5.78 (dd, *J* = 15.4, 10.9 Hz, 1H), 4.56 (s, 1H), 4.50 (d, *J* = 11.3 Hz, 1H), 4.26 (d, *J* = 9.9 Hz, 1H), 4.20 – 4.05 (m, 2H), 3.98 (d, *J* = 11.3 Hz, 1H), 3.71 (d, *J* = 10.4 Hz, 1H), 3.66 (s, 3H), 1.64 – 1.49 (m, 2H), 1.36 – 1.21 (m, 2H), 0.83 (t, *J* = 7.4 Hz, 3H). <sup>13</sup>C NMR (CDCl<sub>3</sub>, 100 MHz): δ 172.1, 161.9, 153.5, 145.2, 136.3, 134.8, 132.4, 128.9, 127.8, 126.6, 123.4, 122.4, 119.1, 113.8, 113.5, 68.1, 65.6, 55.2, 54.9, 52.7, 30.6, 19.2, 13.7. HRMS (ESI): Calc. for C<sub>26</sub>H<sub>28</sub>BrNO<sub>5</sub> [M+H]<sup>+</sup> 514.1222, measured 514.1232.

**Dimethyl (*E*)-2-methyl-3-styryl-1,2,3,9b-tetrahydrochromeno[4,3-b]pyrrole 2,3a(4*H*)-dicarboxylate (3v)**

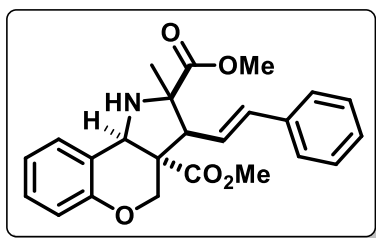

Physical state : Colorless liquid, yield : 64% (78 mg), <sup>1</sup>H NMR (400 MHz, CDCl<sub>3</sub>) δ 7.34 (dd, *J* = 8, 1.4 Hz, 1H), 7.26-7.25 (m, 4H), 7.22 – 7.18 (m, 2H), 7.15 – 7.09 (m, 1H), 6.88 (td, *J* = 7.5, 1.1 Hz, 1H), 6.83 (d, *J* = 8 Hz, 1H), 6.42 (d, *J* = 16 Hz, 1H), 5.73 (dd, *J* = 16, 12 Hz, 1H), 4.60 (s, 1H), 4.46 (d, *J* = 12 Hz, 1H), 4.04 (d, *J* = 12 Hz, 1H), 3.61 (s, 3H), 3.57 (s, 3H), 3.18 (d, *J* = 12 Hz, 1H), 1.56 (s, 3H). <sup>13</sup>C NMR (100 MHz, CDCl<sub>3</sub>) δ 174.67, 172.85, 154.22, 136.35, 135.55, 130.98, 129.19, 128.77, 128.10, 126.46, 121.38,

121.21, 120.28, 117.16, 69.69, 64.94, 63.29, 58.17, 56.82, 52.74, 52.69, 26.33. HRMS (ESI): Calc. For C<sub>24</sub>H<sub>25</sub>NO<sub>5</sub> [M+Na]<sup>+</sup> 430.1630, measured 430.1602.

**Butyl 2-methyl (*E*)-8-bromo-3-styryl-1,2,3,9b-tetrahydrochromeno[4,3-b]pyrrole 2,3a(4*H*)- dicarboxylate (10)**

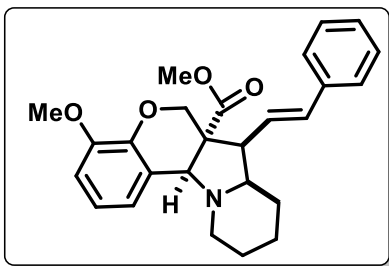

Physical state: White solid, Yield: 81% (83 mg), M. P (°C) :148-150, <sup>1</sup>H NMR (CDCl<sub>3</sub>, 400 MHz): δ δ 7.39 – 7.27 (m, 6H), 6.90 – 6.88 (m, 2H), 6.77 (dd, *J* = 6.5, 3.1 Hz, 1H), 6.45 (d, *J* = 15.8 Hz, 1H), 6.11 (dd, *J* = 15.8, 8.6 Hz, 1H), 4.82 (dd, *J* = 10.9, 1.2 Hz, 1H), 4.34 – 4.24 (m, 1H), 3.84 (s, 3H), 3.67 (s, 3H), 3.20-3.26 (m, 1H), 3.16-3.10 (m, 1H), 2.95 (t, *J* = 9.1 Hz, 1H), 2.15 – 1.93 (m, 4H), 1.71 – 1.57 (m, 1H). <sup>13</sup>C NMR (CDCl<sub>3</sub>, 100 MHz): δ 172.4, 148.6, 142.9, 136.7, 134.1, 129.6, 128.8, 128.0, 126.6, 123.6, 121.2, 121.1, 115.5, 110.9, 77.5, 77.2, 76.8, 68.0, 65.9, 65.1, 57.2, 56.9, 56.1, 55.7, 52.7, 31.3, 29.8, 26.8. HRMS (ESI): Calc. for C<sub>26</sub>H<sub>29</sub>NO<sub>4</sub> [M+H]<sup>+</sup> 420.2175, measured 420.2180.

**Methyl (*E*)-3a-(hydroxymethyl)-3-styryl-1,2,3,3a,4,9b-hexahydrochromeno[4,3-b]pyrrole-2-carboxylate (11)**

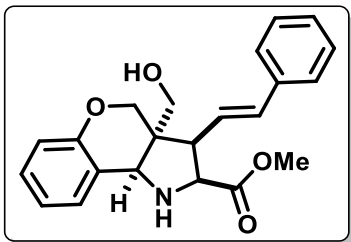

Physical state: colorless oil, Yield: 89% (65 mg), <sup>1</sup>H NMR (CDCl<sub>3</sub>, 400 MHz): δ 7.47 (dd, *J* = 7.7, 1.3 Hz, 1H), 7.32 (d, *J* = 4.4 Hz, 4H), 7.28 – 7.20 (m, 4H), 6.98 (td, *J* = 7.5, 1.1 Hz, 1H), 6.92 – 6.89 (m, 1H), 6.64 (d, *J* = 15.4 Hz, 1H), 4.30 (d, *J* = 10.0 Hz, 1H),



4.24 (s, 1H), 4.04 (d,  $J = 11.6$  Hz, 1H), 3.95 (d,  $J = 10.6$  Hz, 1H), 3.76 (dd,  $J = 19.1, 8.7$  Hz, 2H), 3.68 (s, 2H), 3.66 (s, 3H), 2.51 (s, 1H).  $^{13}\text{C}$  NMR (100 MHz,  $\text{CDCl}_3$ )  $\delta$  172.3, 154.1, 136.4, 135.9, 131.4, 129.9, 128.9, 128.2, 126.5, 121.9, 121.8, 119.8, 117.4, 65.0, 62.5, 62.4, 57.5, 52.8, 51.4, 49.5. HRMS (ESI): Calc. for  $\text{C}_{22}\text{H}_{23}\text{NO}_4$   $[\text{M}+\text{H}]^+$  366.1705, measured 366.1706

### References:

1. K. H. Kim, H. S. Lee, Y. M. Kim, J. N. Kim. Remarkable Rate Acceleration of Baylis-Hillman Reaction of Notorious  $\alpha,\beta$ -Unsaturated Aldehydes Catalyzed by Proton Donor. *Bull. Korean Chem. Soc.* **2011**, 32, 1087- 1090
2. K. H. Kim, S. H. Kim, S. Park, J. N. Kim. Palladium-catalyzed synthesis of indane and cyclobuta[a]indenes from homoallylic alcohols derived from Baylis-Hillman adducts: base-dependent stereoselectivity for the benzylidene group in cyclobuta[a]indene. *Tetrahedron*, **2011**, 67, 3328- 3336

# **$^1\text{H}$ and $^{13}\text{C}$ spectrums of the compounds**

**Dimethyl (*E*)-3-styryl-1,2,3,9b-tetrahydrochromeno[4,3-b]pyrrole-2,3a(4*H*)-dicarboxylate (8a)**

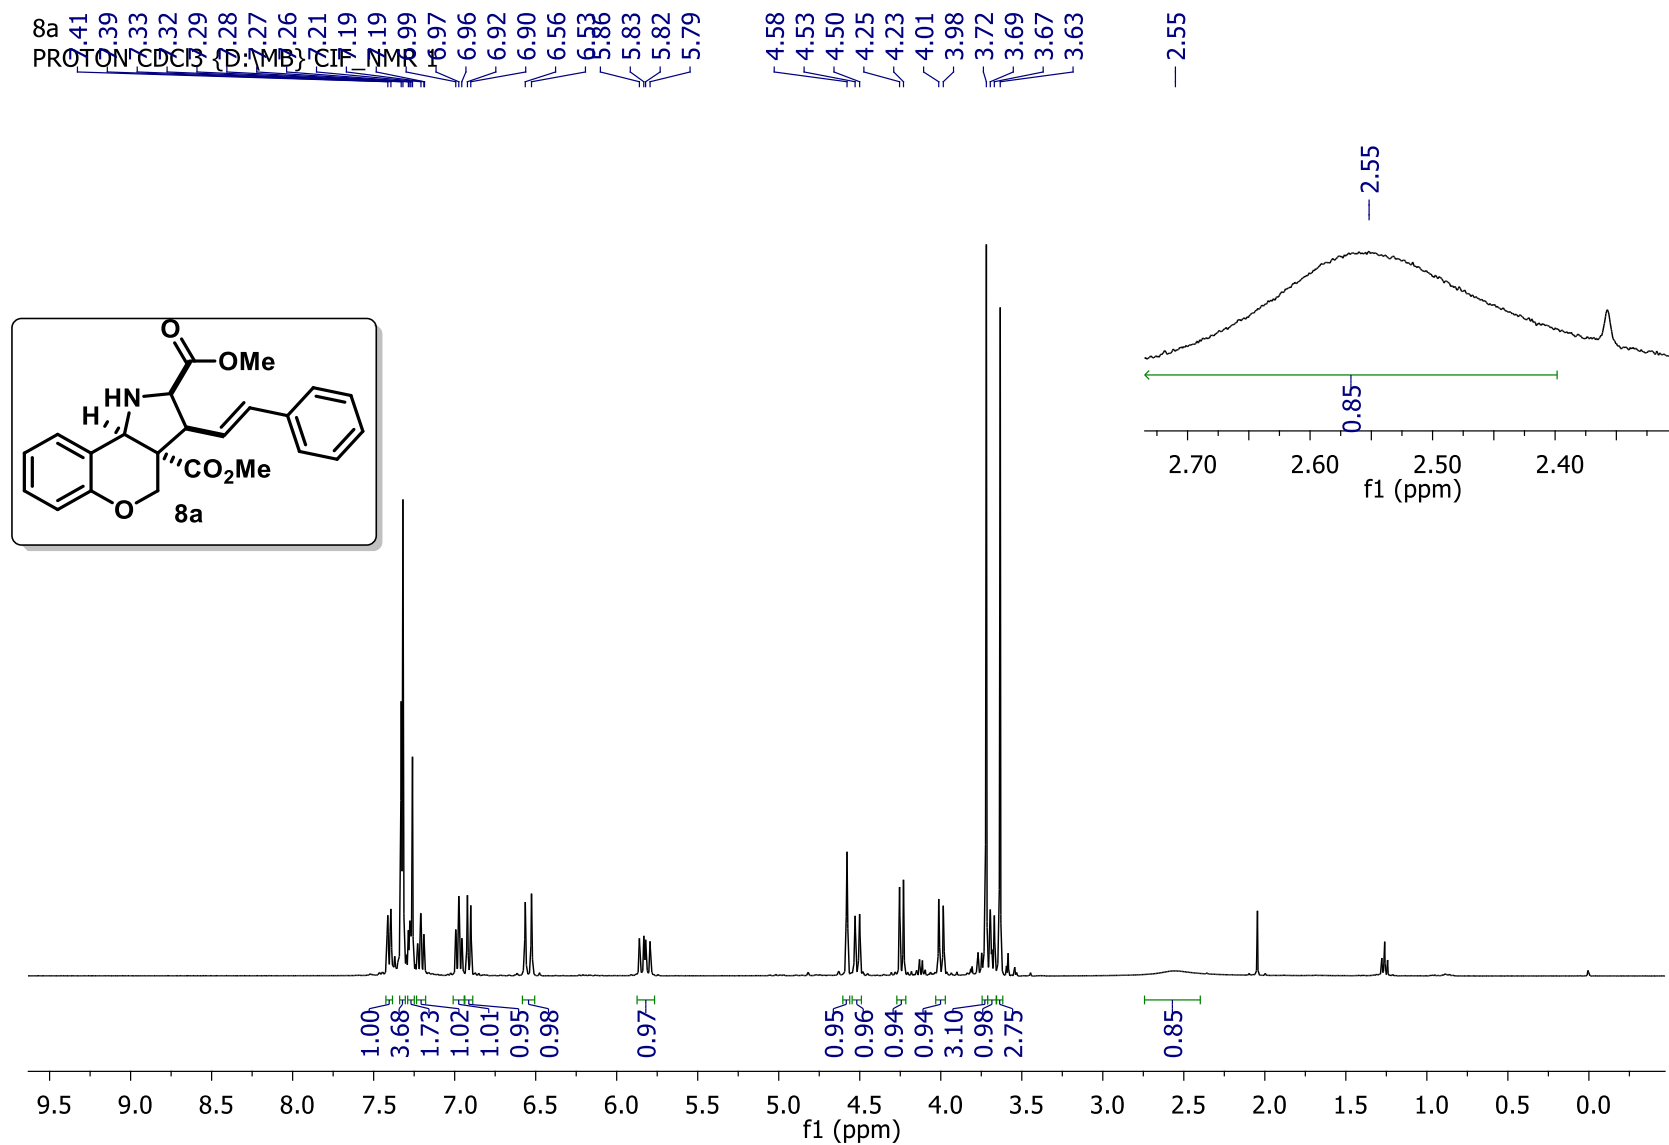

173.09  
172.24

154.30

136.39  
135.98  
130.84  
129.29  
128.82  
128.19  
126.56  
121.46  
121.18  
120.73  
117.27

77.49  
77.17  
76.85

64.26  
63.67  
59.47  
55.70  
55.33  
52.80  
52.43

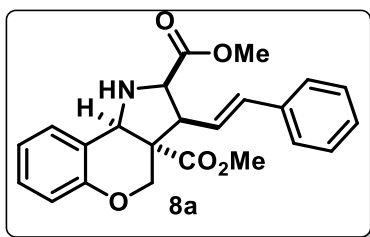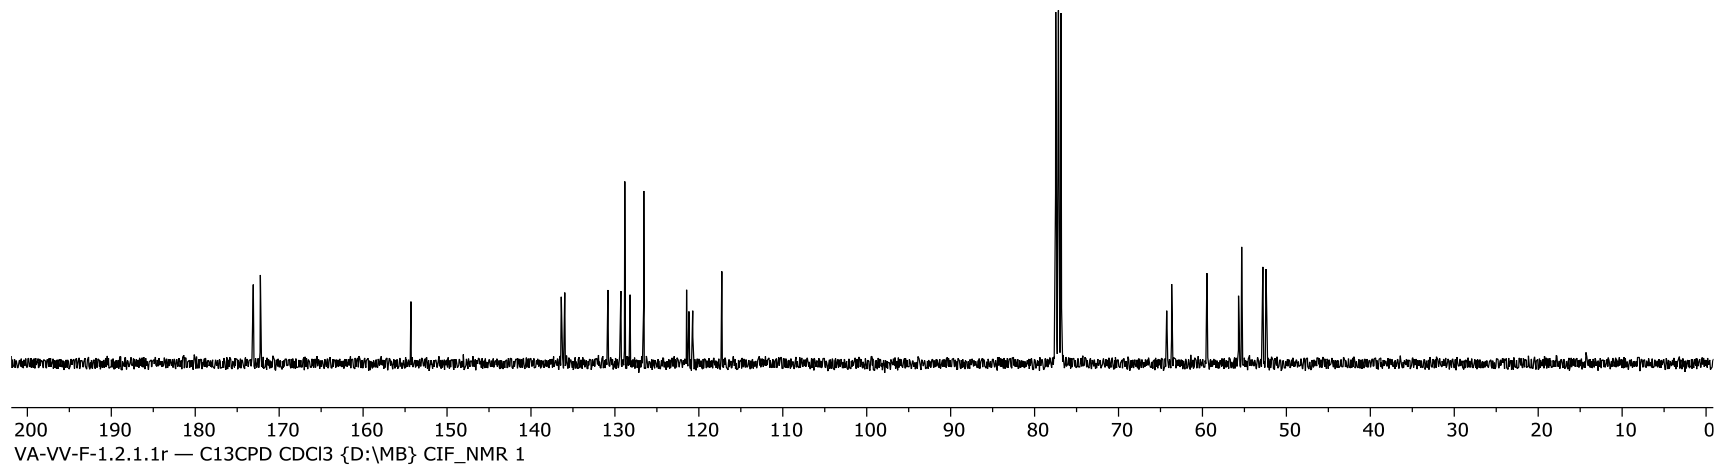

**3a-Ethyl 2-methyl (*E*)-3-styryl-1,2,3,9b-tetrahydrochromeno[4,3-b]pyrrole-2,3a(4*H*)-dicarboxylate (8b)**

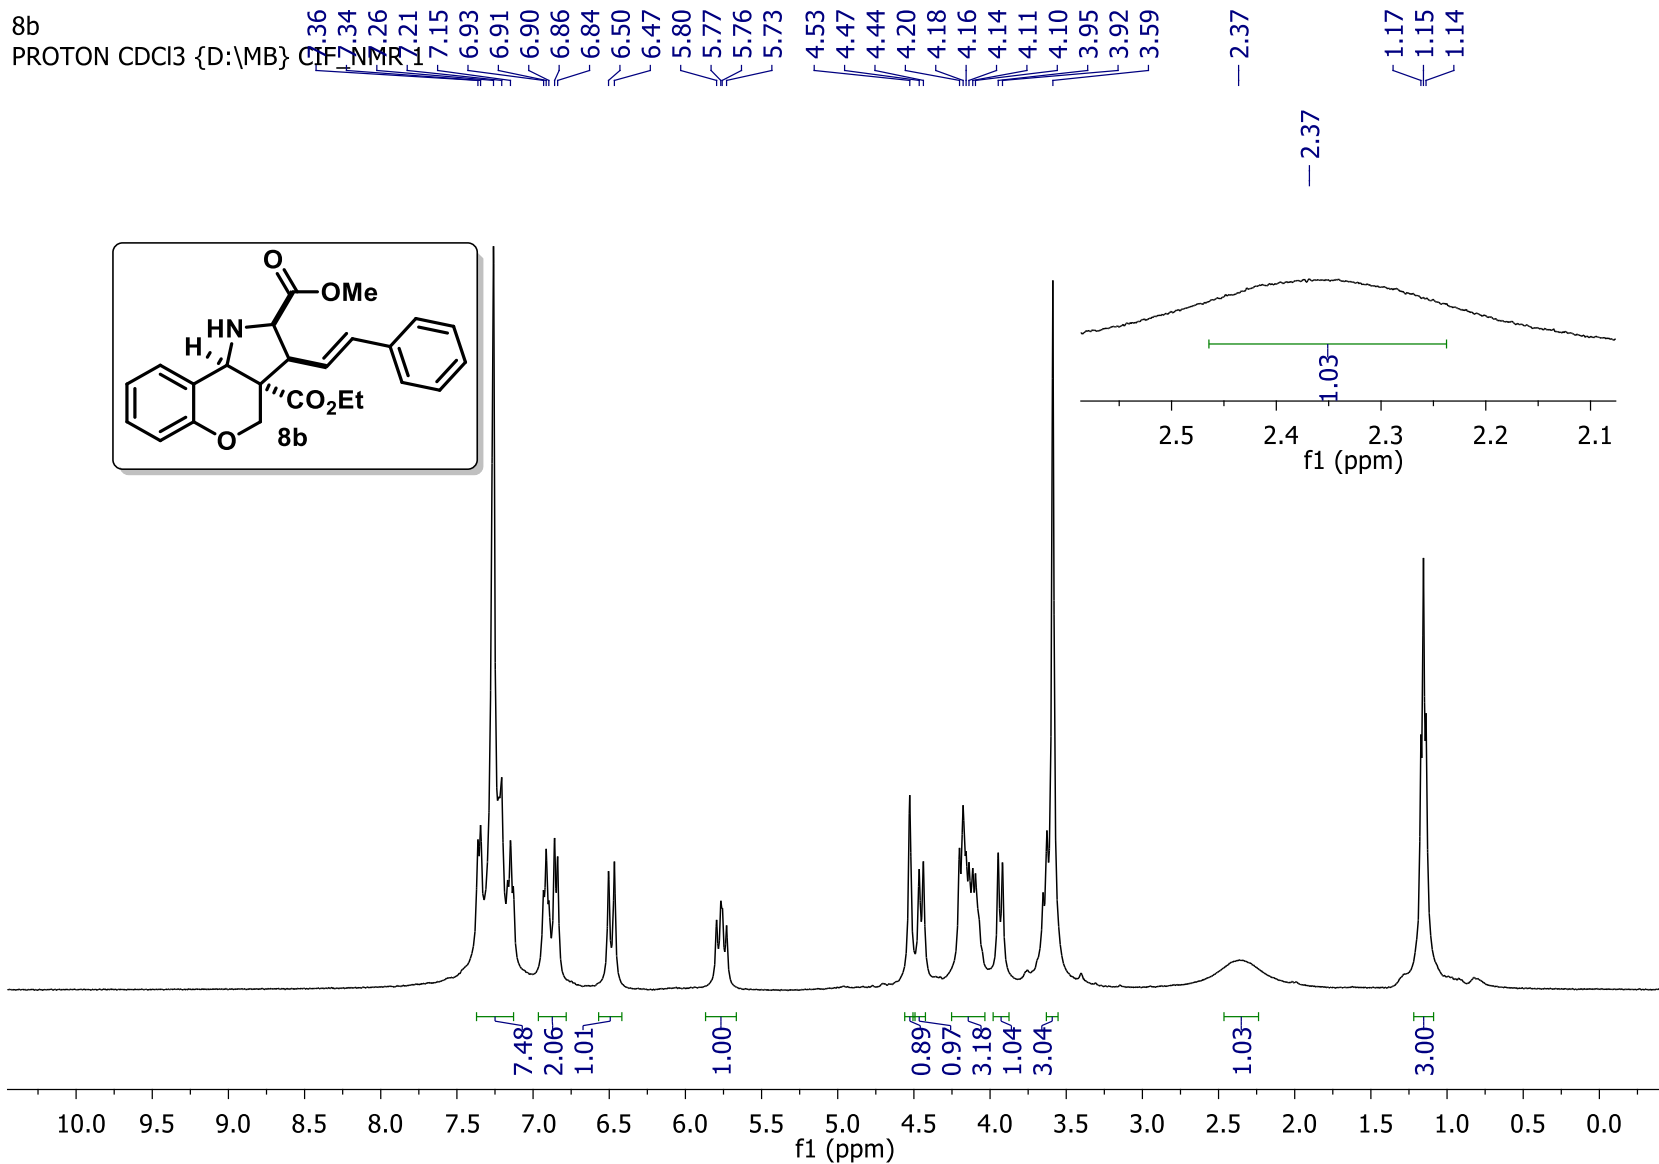

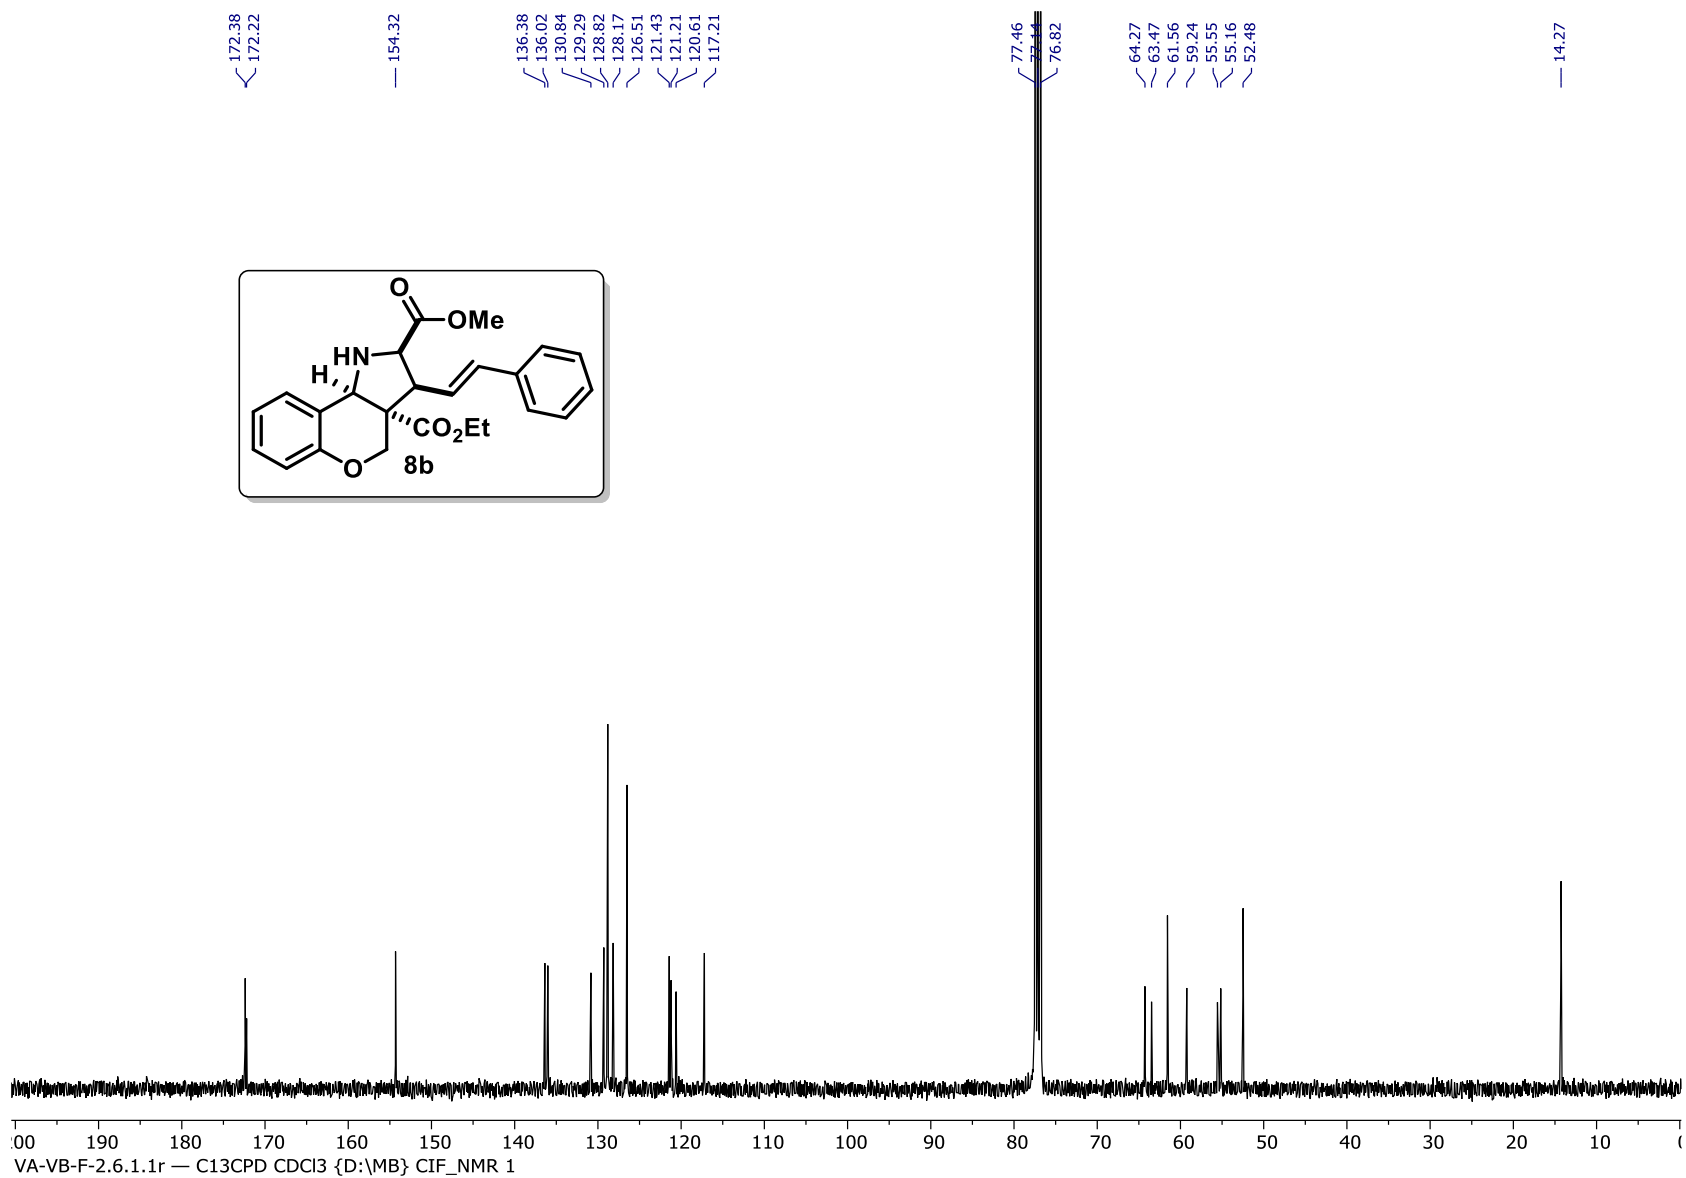

Dimethyl (*E*)-6,8-dichloro-3-styryl-1,2,3,9b-tetrahydrochromeno[4,3-b]pyrrole-2,3a(4*H*)-dicarboxylate (8c):

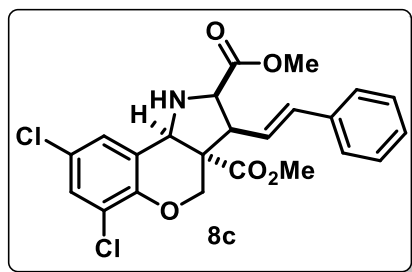

7.33  
7.31  
7.30  
7.30  
7.29  
7.26  
6.57  
6.53  
5.81  
5.79  
5.77  
5.75  
4.66  
4.63  
4.63  
4.53  
4.22  
4.20  
4.05  
4.02  
3.73  
3.68  
3.64  
— 2.69

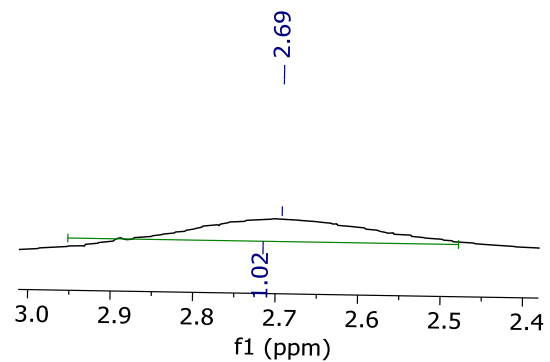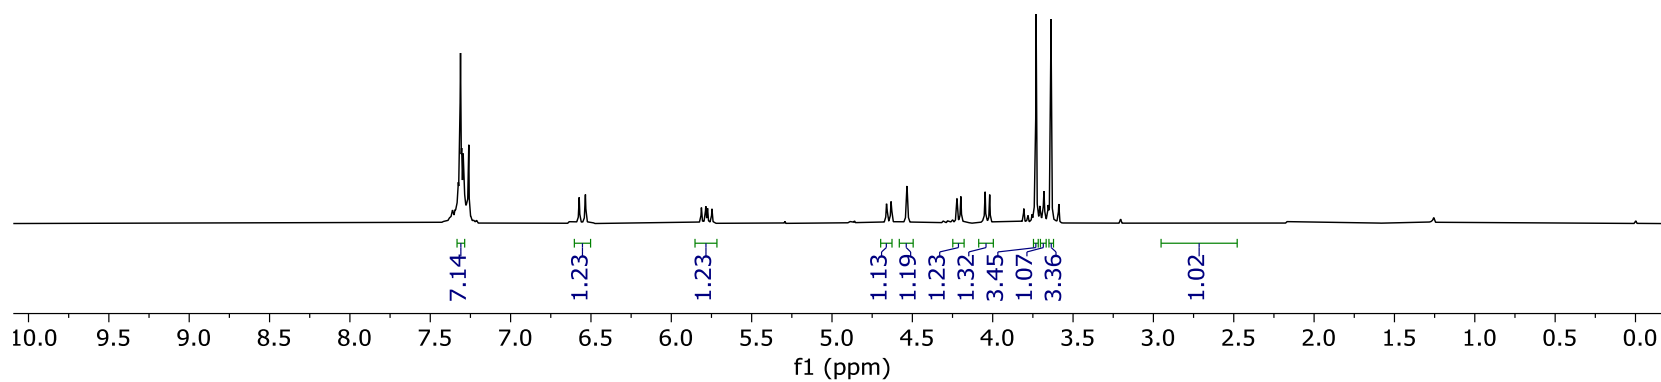

8c — PROTON CDCl<sub>3</sub> {D:\MB} CIF\_NMR 1 —

VA-VB-F-4.6.1.1r  
C13CPD CDCl3 {DMSO-d6} CIF\_NMR 1

172.49  
172.08

149.06

136.43  
136.22  
129.63  
128.96  
128.87  
128.35  
126.57  
126.07  
123.58  
122.95  
120.51

77.49  
77.17  
76.86

65.21  
63.40  
58.90  
55.19  
54.92  
53.04  
52.58

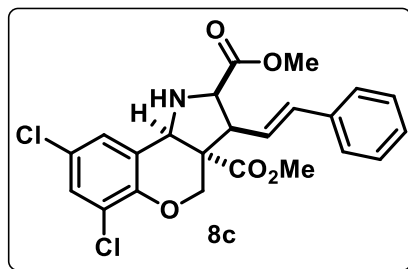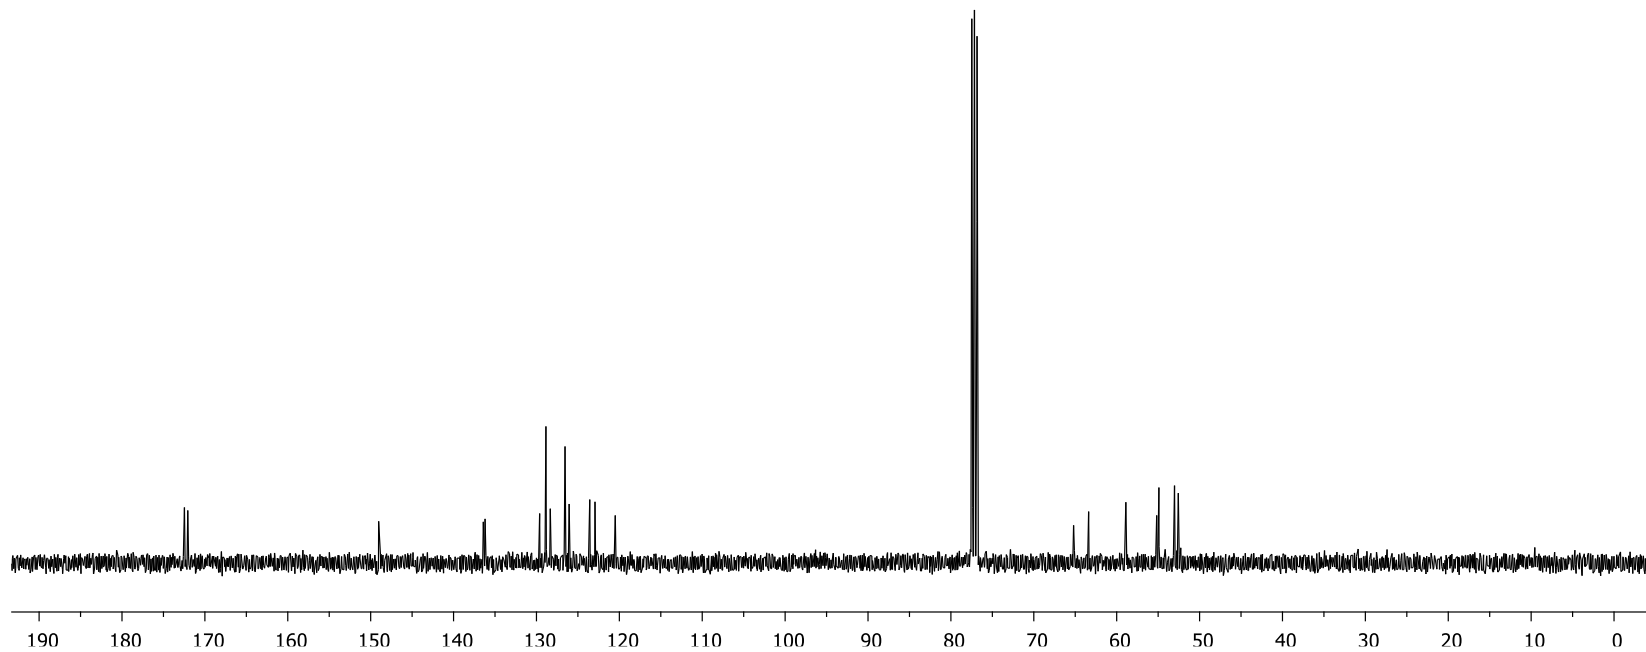



# Dimethyl (*E*)-6-ethoxy-3-styryl-1,2,3,9b-tetrahydrochromeno[4,3-b]pyrrole-2,3a(4*H*)-dicarboxylate (8d)

VA-VB-F-5.1.1.1r

PROTON CDCl<sub>3</sub> {D:\MB} CIF\_NMR 1

7.34  
7.34  
7.33  
7.28  
7.09  
7.08  
7.07  
7.06  
6.95  
6.93  
6.91  
6.84  
6.84  
6.82  
6.82  
6.82  
6.59  
6.55  
5.88  
5.85  
5.84  
5.81

4.67  
4.65  
4.65

4.29  
4.11  
4.09  
4.09

3.74  
3.74  
3.73  
3.72  
3.65  
3.63  
3.62

1.47  
1.45  
1.44

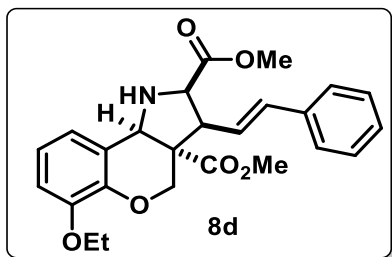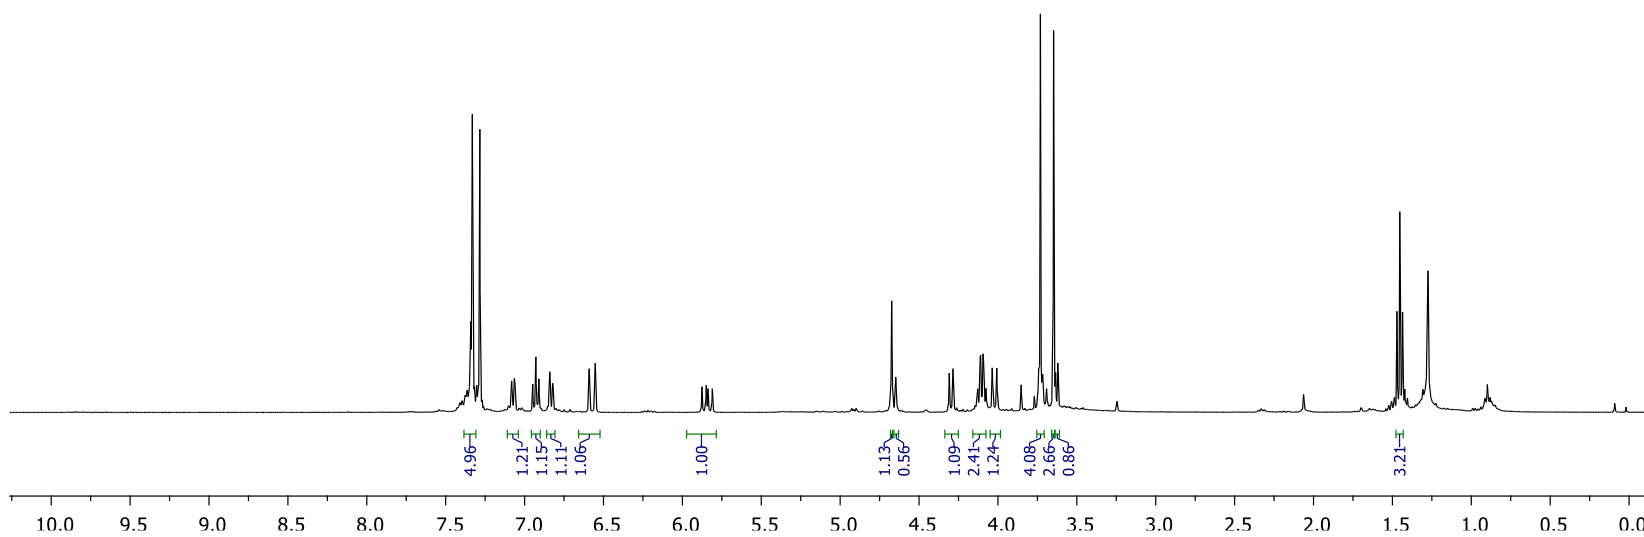

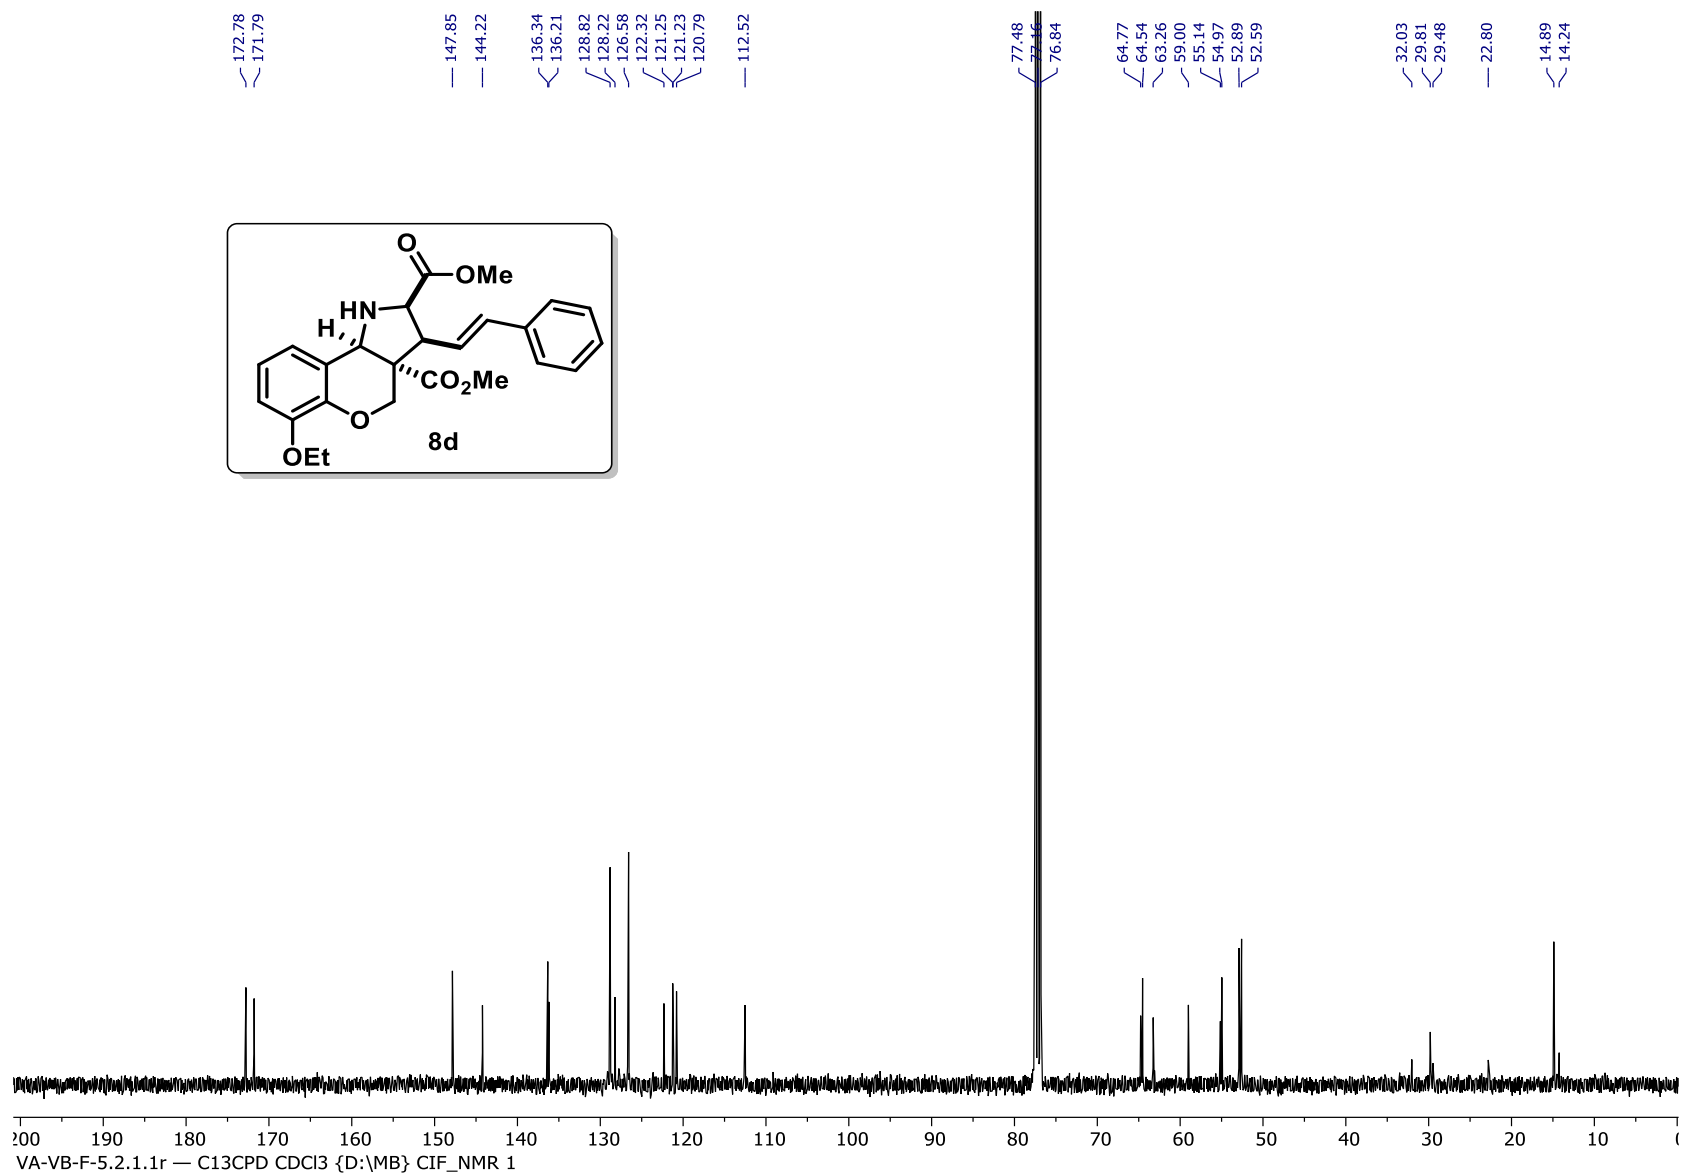

**Dimethyl (*E*)-8-bromo-3-styryl-1,2,3,9b-tetrahydrochromeno[4,3-b]pyrrole-2,3a(4*H*)-dicarboxylate (8e):**

7.53  
7.52  
7.33  
7.32  
7.31  
7.31  
7.30  
7.28  
7.28  
7.26  
6.80  
6.78  
6.56  
6.52  
5.82  
5.80  
5.78  
5.76  
4.52  
4.49  
4.49  
4.23  
4.21  
3.72  
3.68  
3.64  
— 2.44

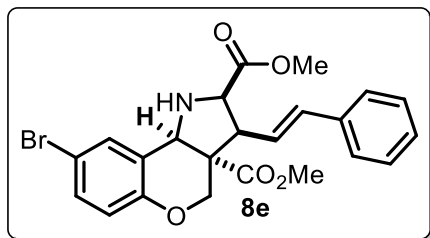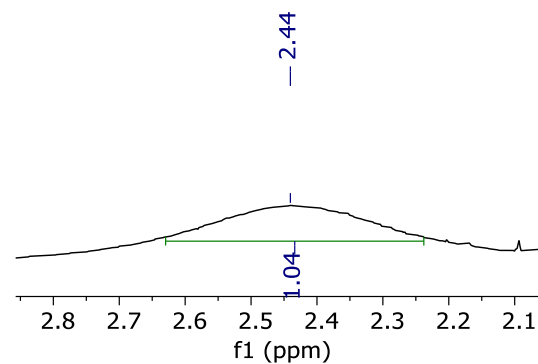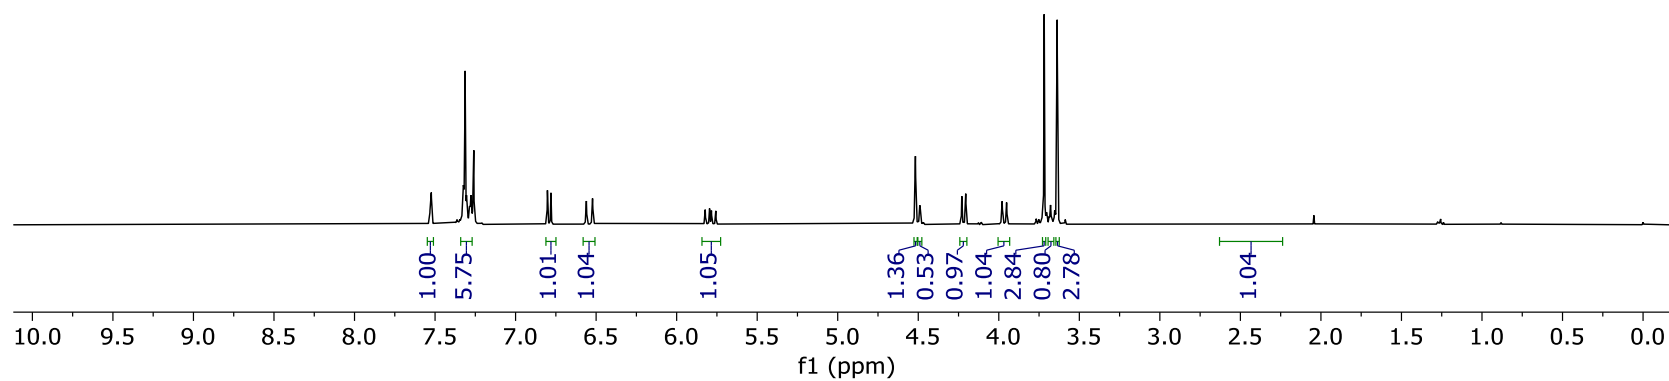

8e — PROTON CDCl<sub>3</sub> {D:\MB} CIF\_NMR 1 —

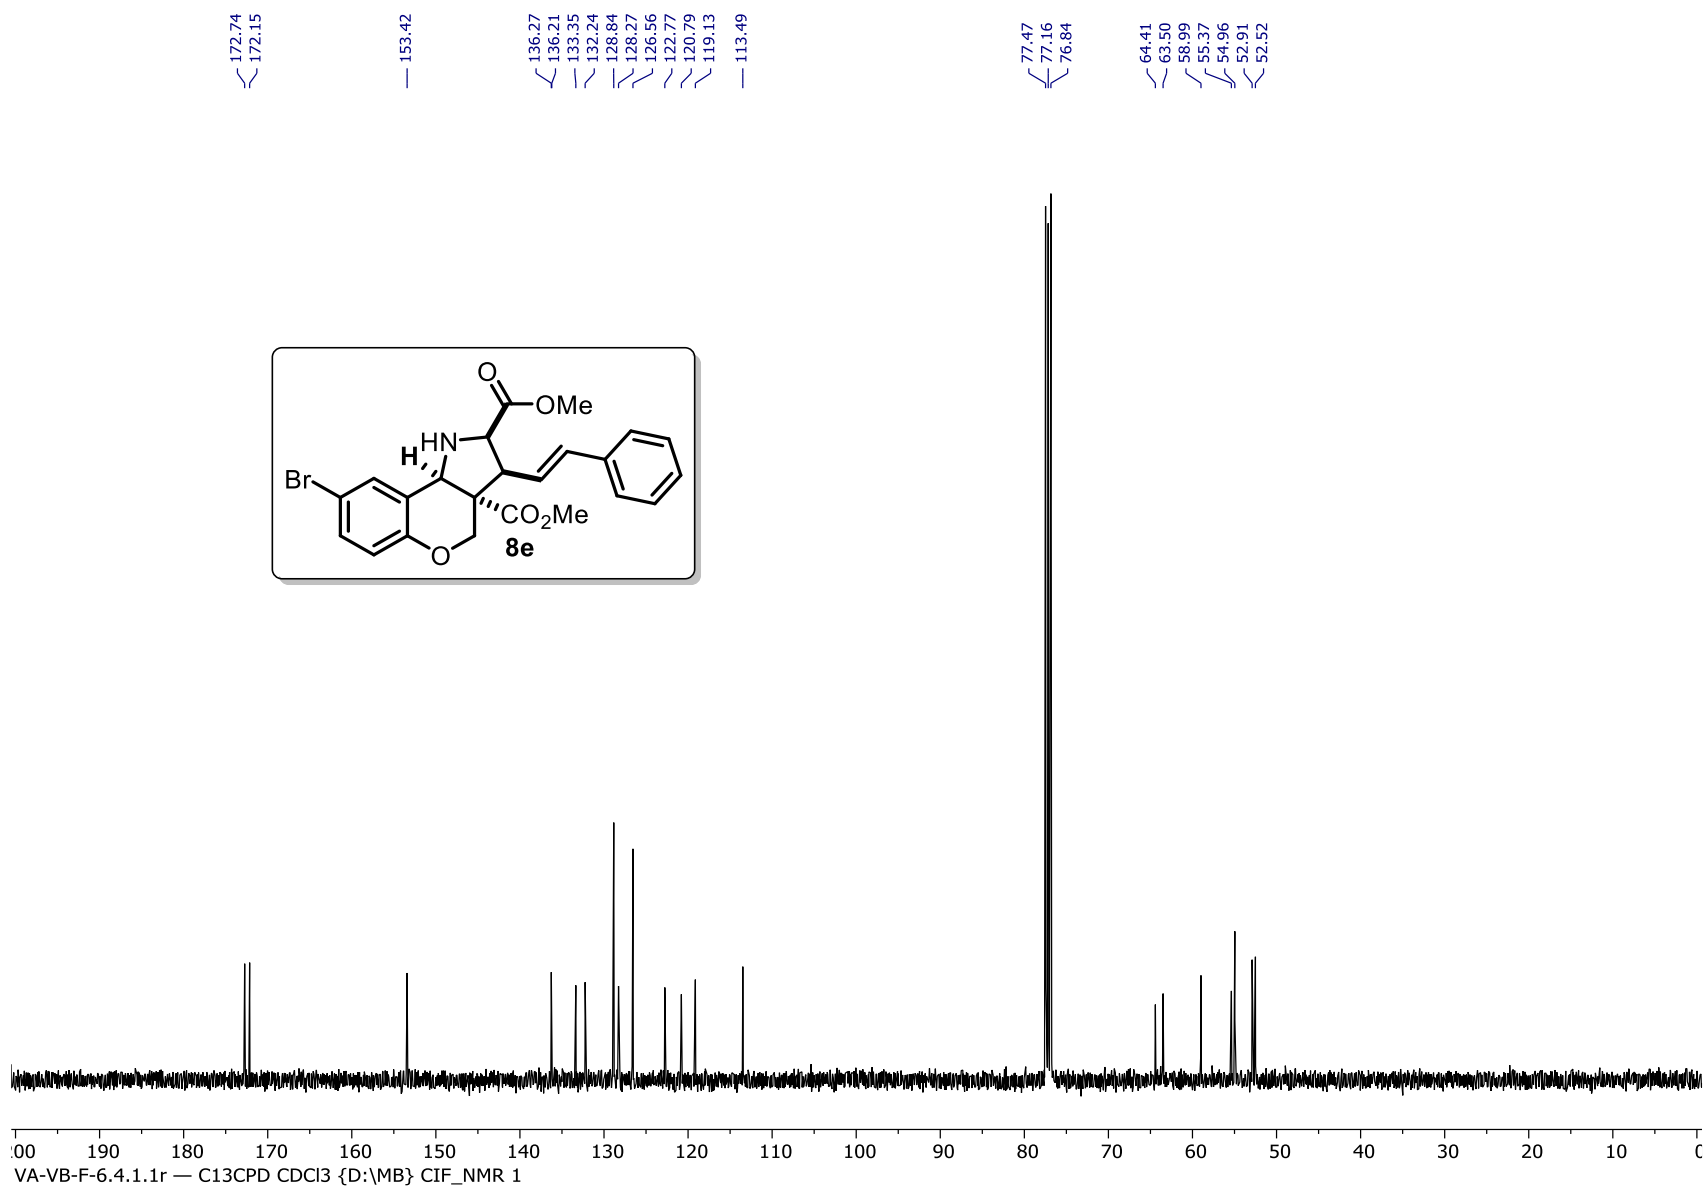

**Dimethyl (*E*)-3-styryl-1,2,3,11c-tetrahydrobenzo[5,6]chromeno[4,3-b]pyrrole-2,3a(4*H*)-dicarboxylate (8f):**

8f

PROTON CDCl<sub>3</sub> {DMSO-*d*<sub>6</sub>}

8.30, 8.27, 7.72, 7.70, 7.36, 7.35, 7.26, 7.12, 7.09, 6.80, 6.57, 5.89, 5.86, 5.85, 5.82

— 5.02

4.39, 4.37

4.19, 4.17

3.69, 3.65

— 2.87

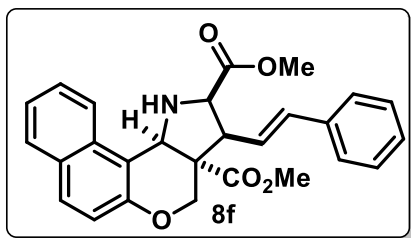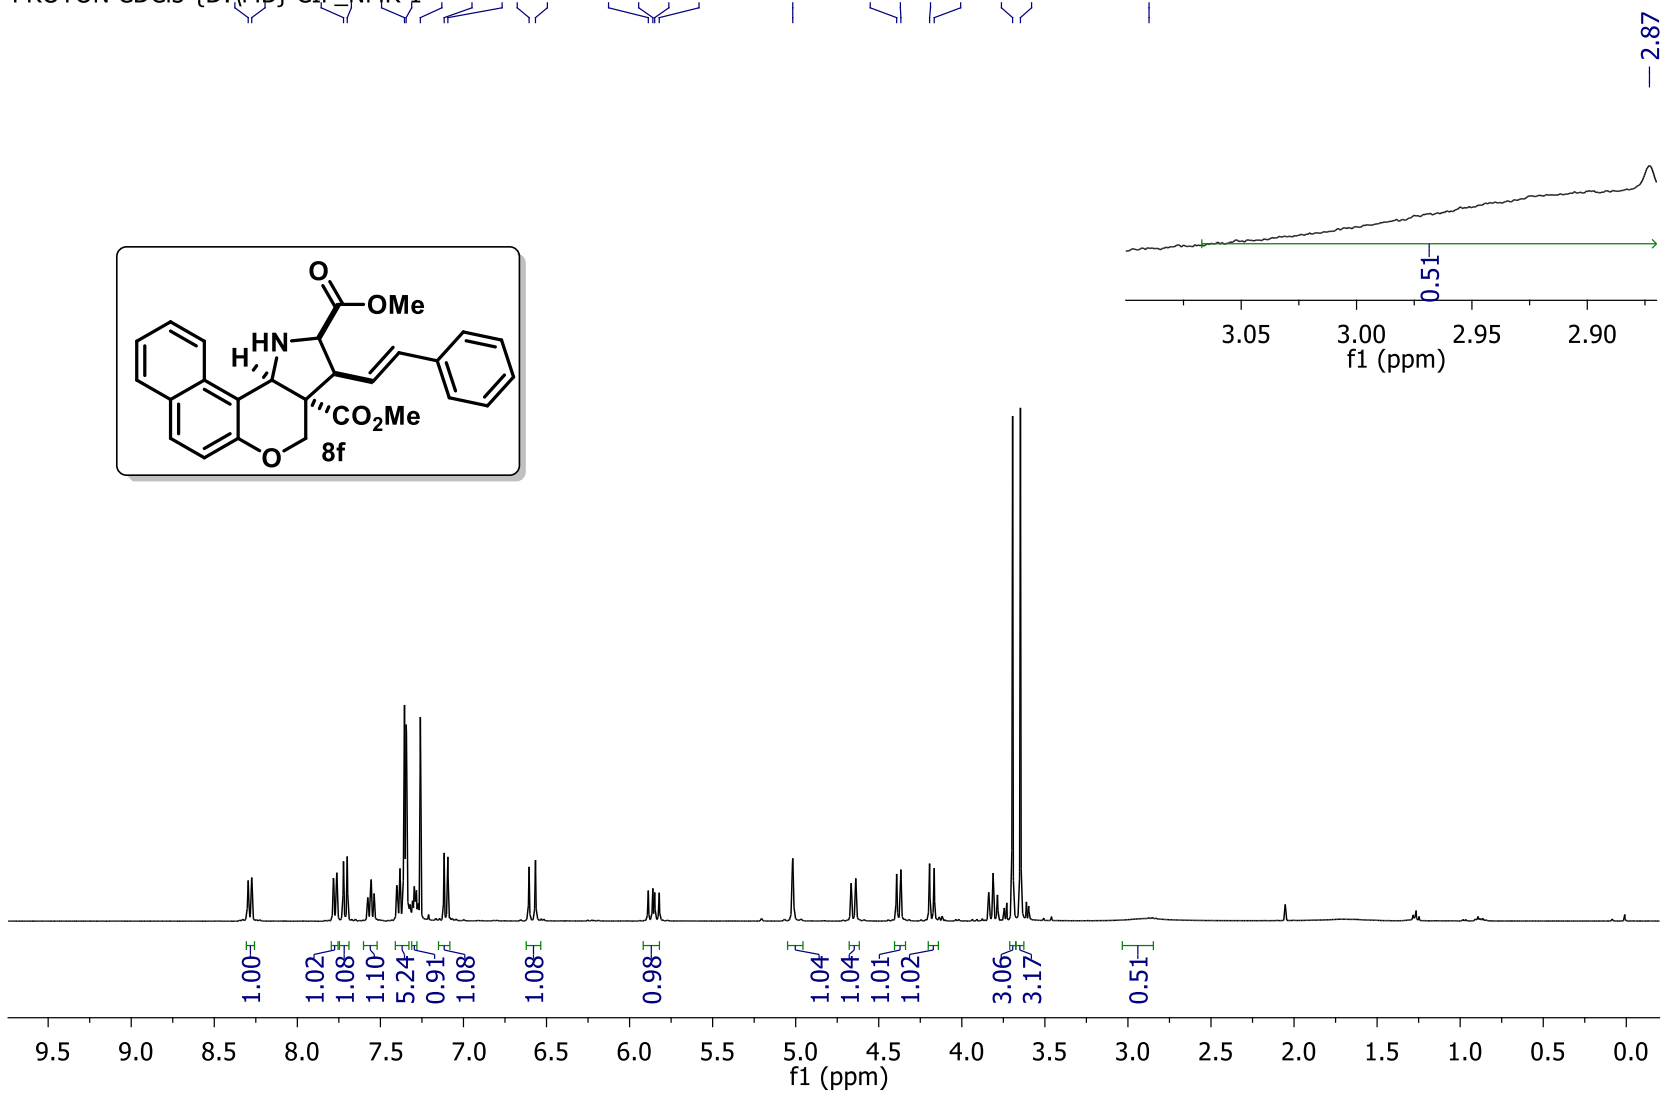

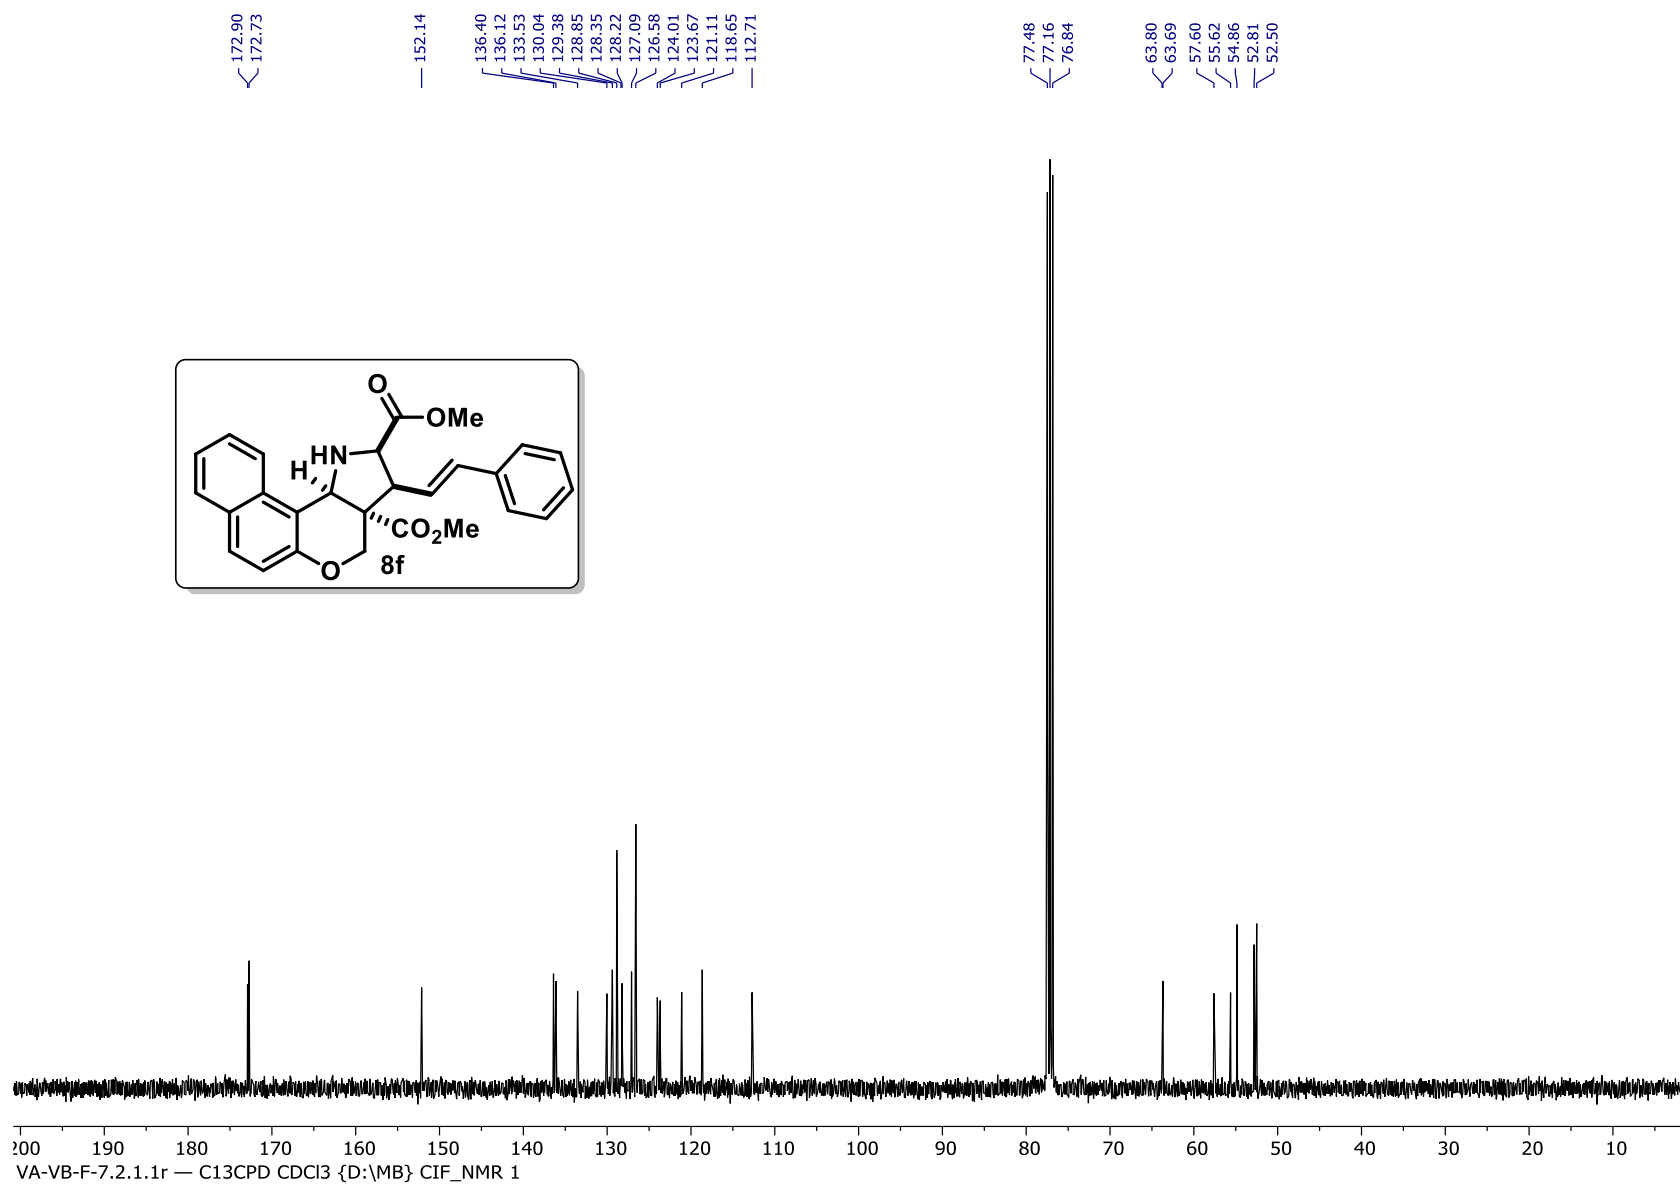



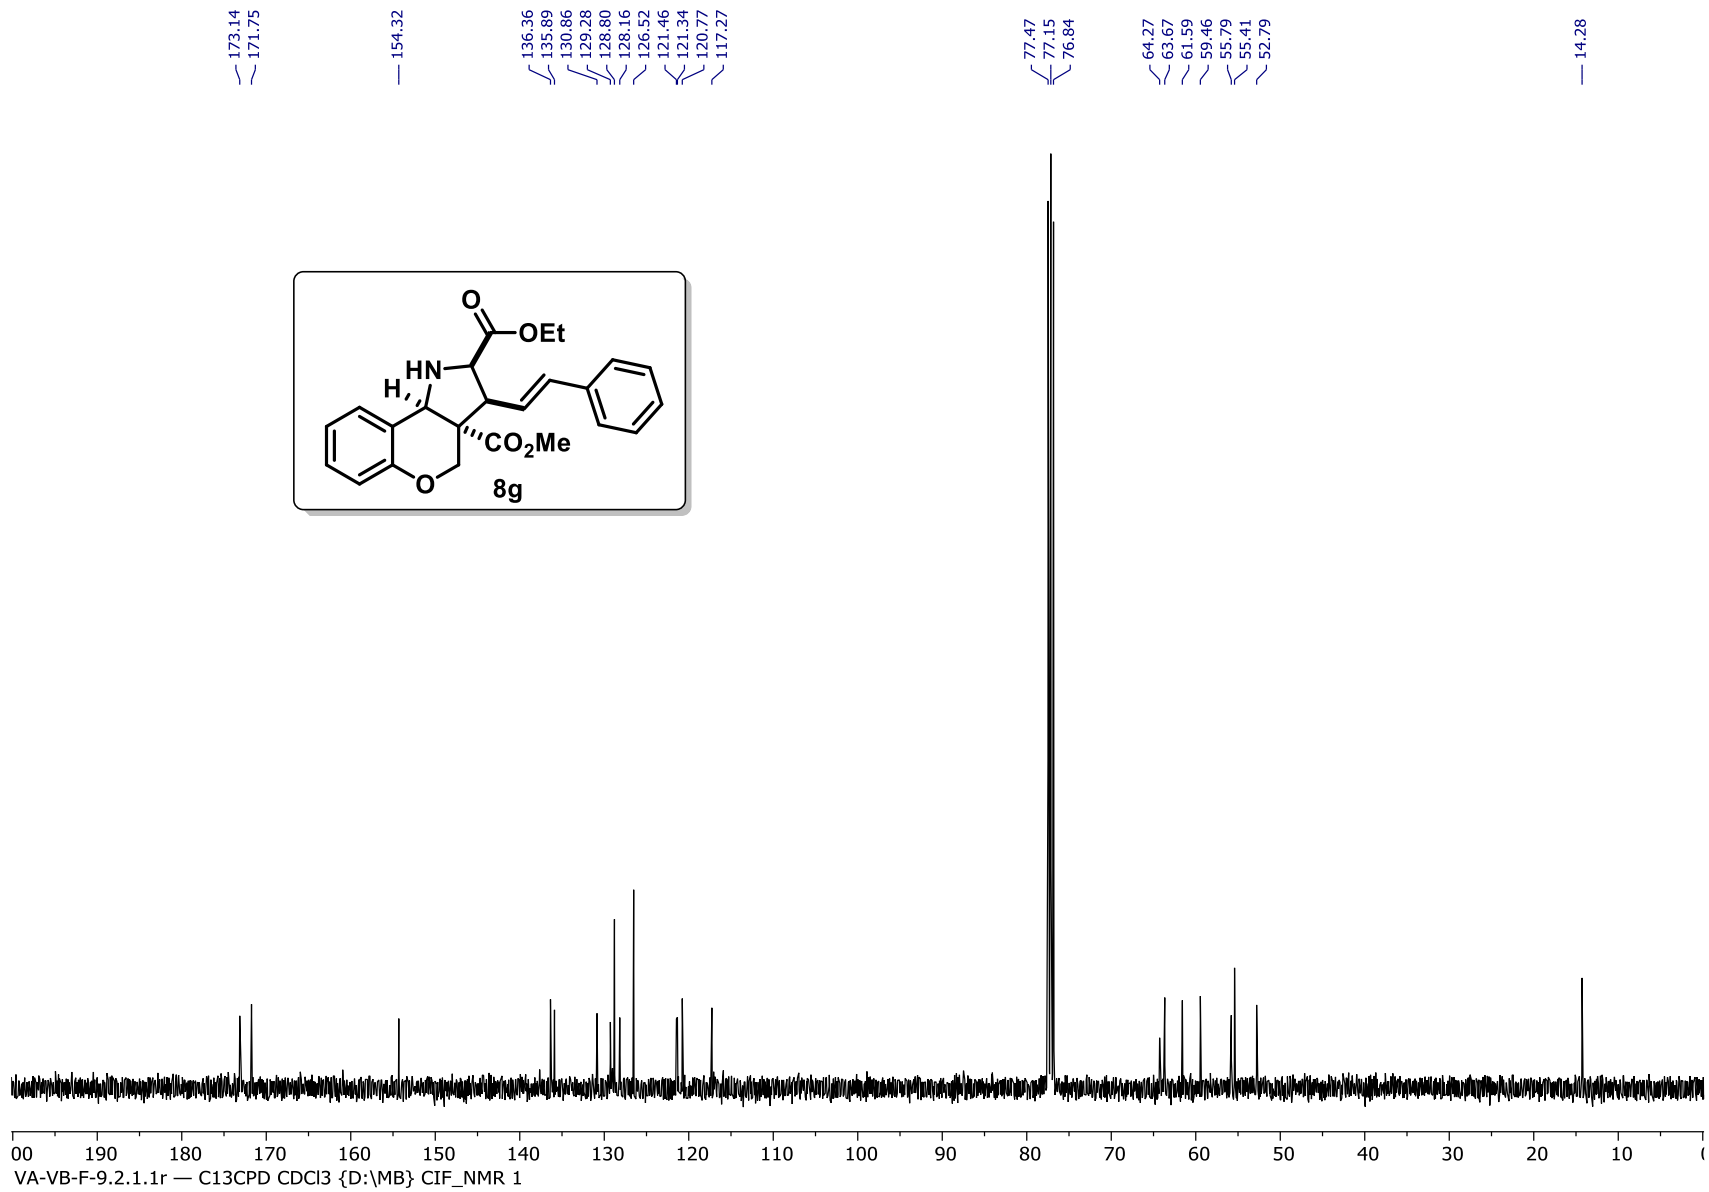





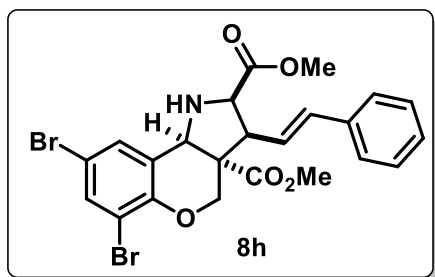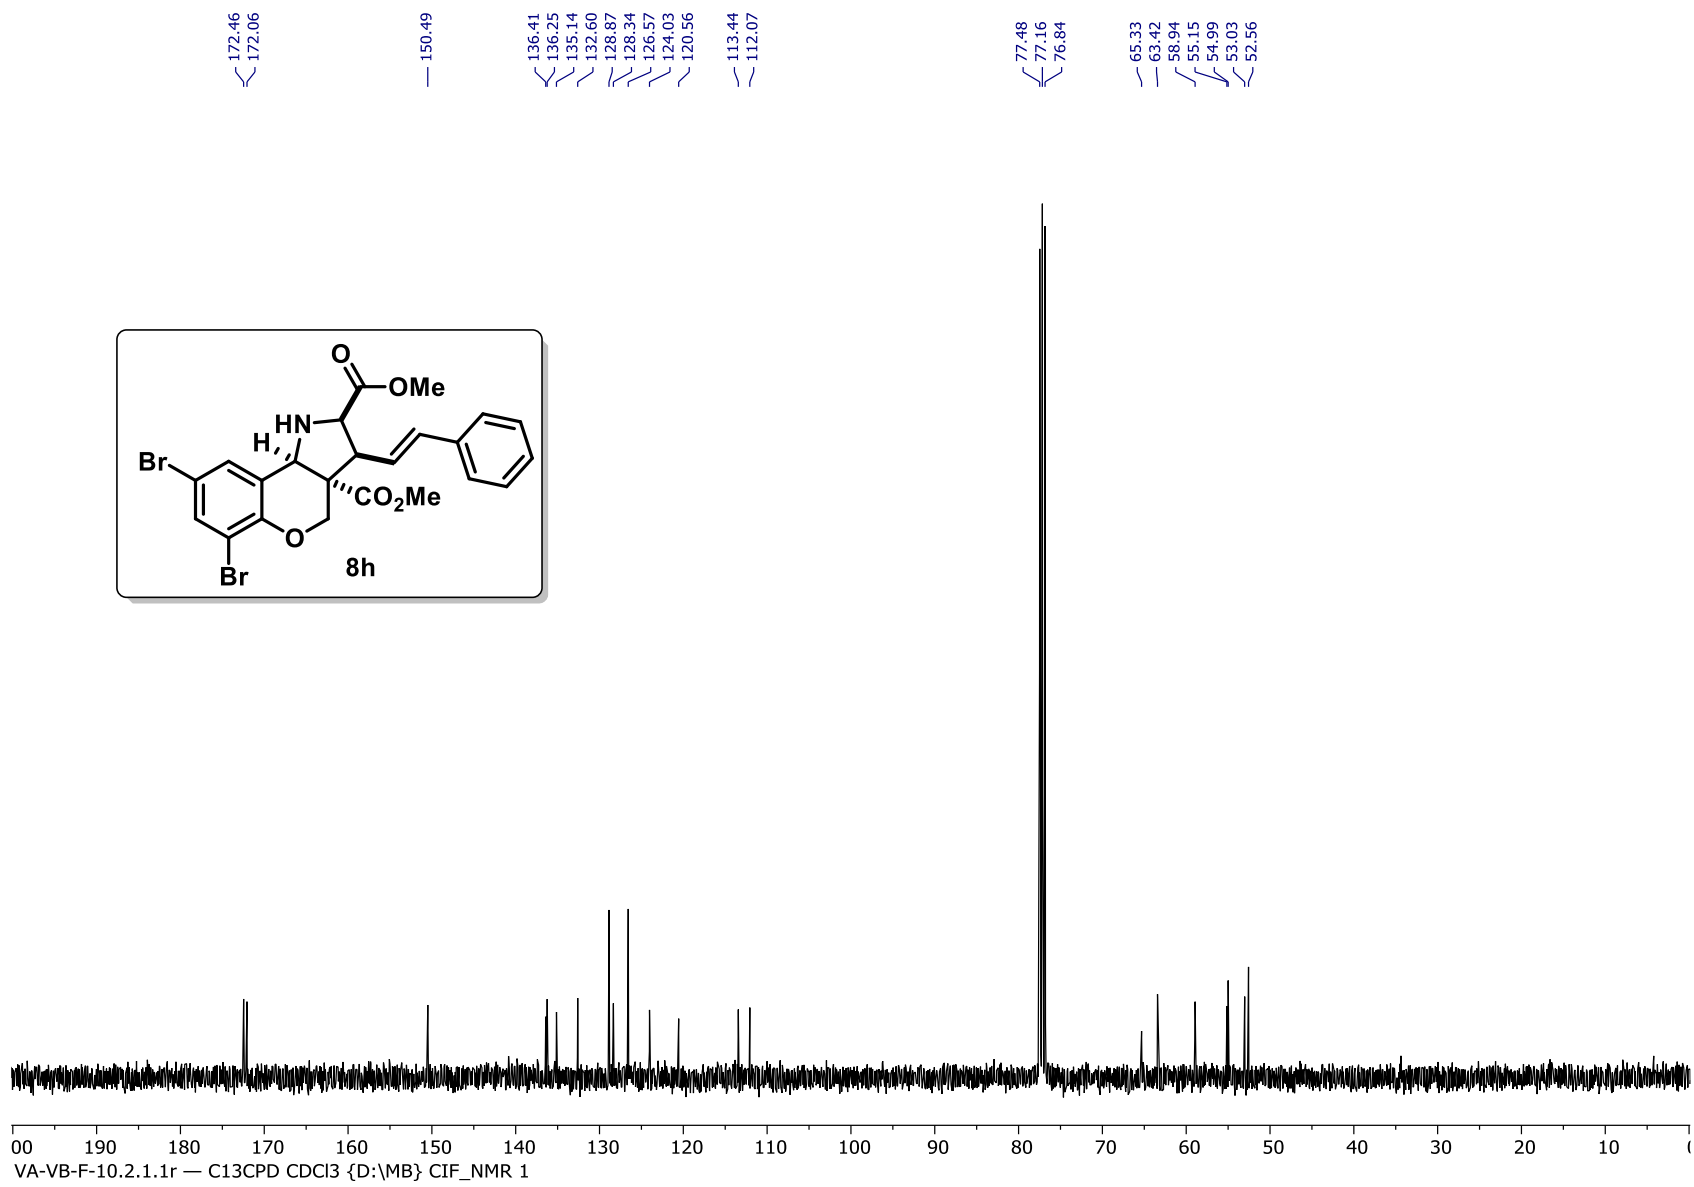



172.45  
171.52

150.45

136.26  
136.15  
135.05  
132.59  
128.80  
128.26  
126.48  
124.02  
120.67

113.37  
112.00

77.48  
77.16  
76.84

65.27  
63.34  
61.70  
58.86  
55.17  
54.99  
52.97

14.24

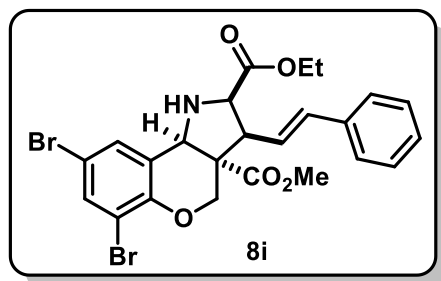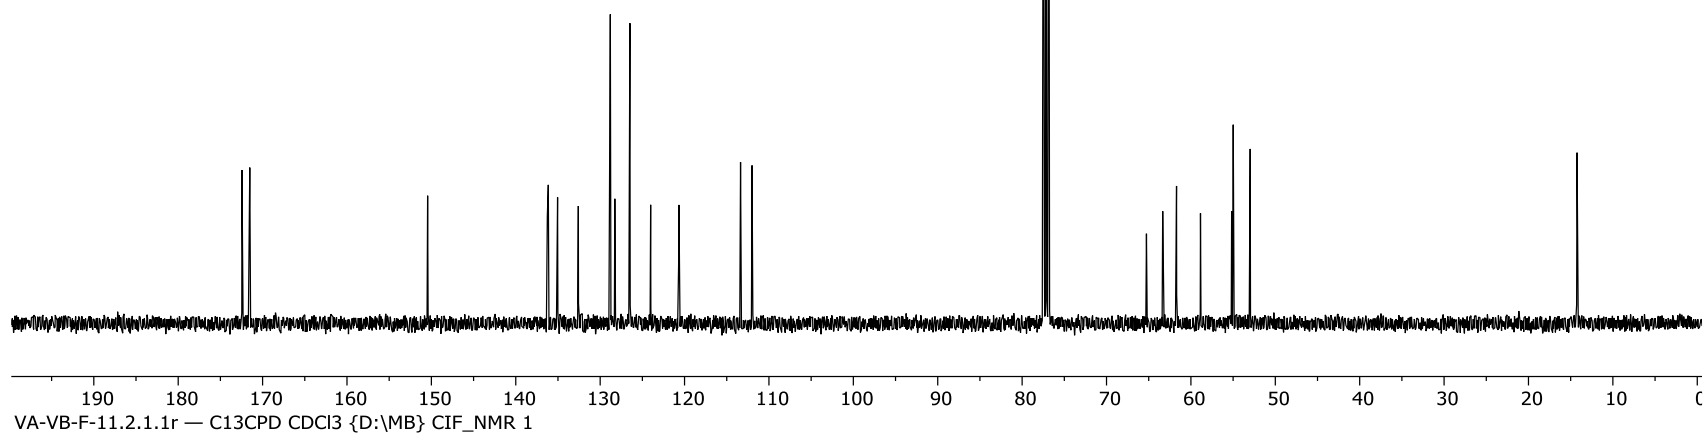

## 2-Ethyl 3a-methyl (*E*)-3-styryl-1,2,3,11c-tetrahydrobenzo[5,6]chromeno[4,3-b]pyrrole-2,3a(4*H*)-dicarboxylate (8j)

VA-VB-F-12.1.1.1r  
 PROTON CDCl<sub>3</sub> {D:\MB}

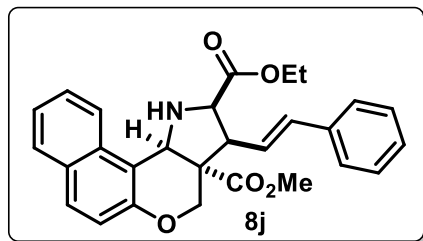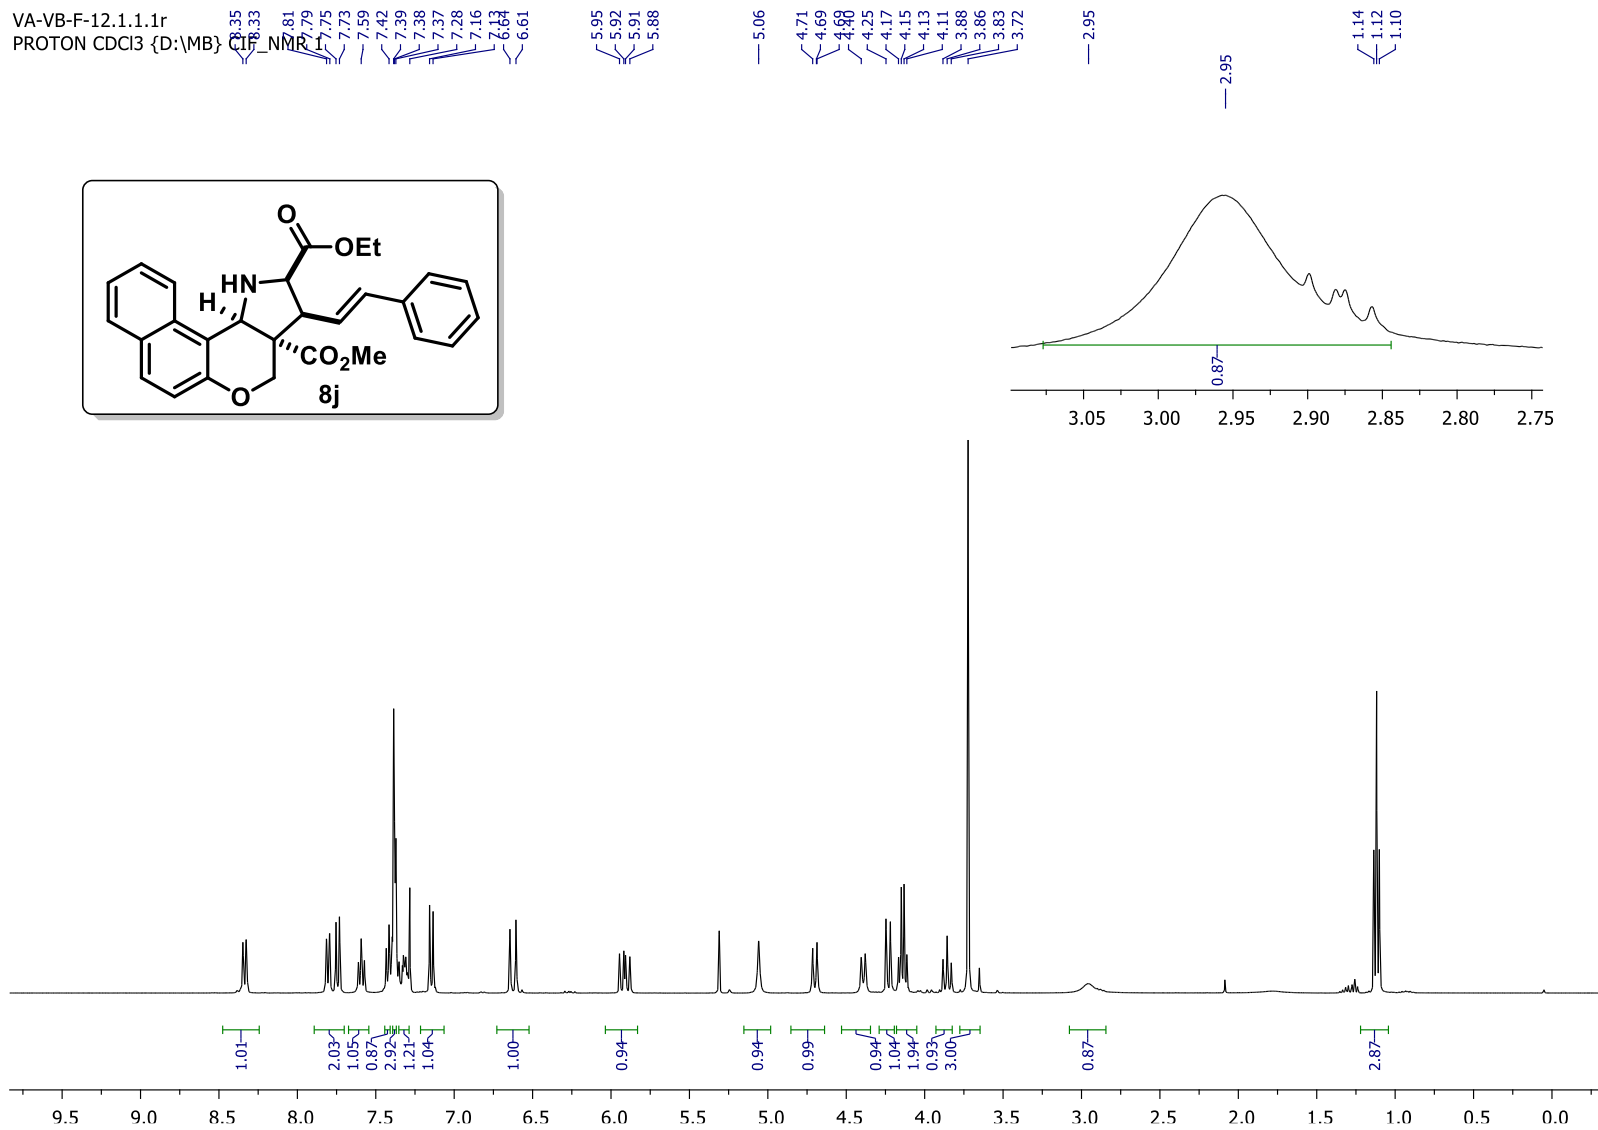

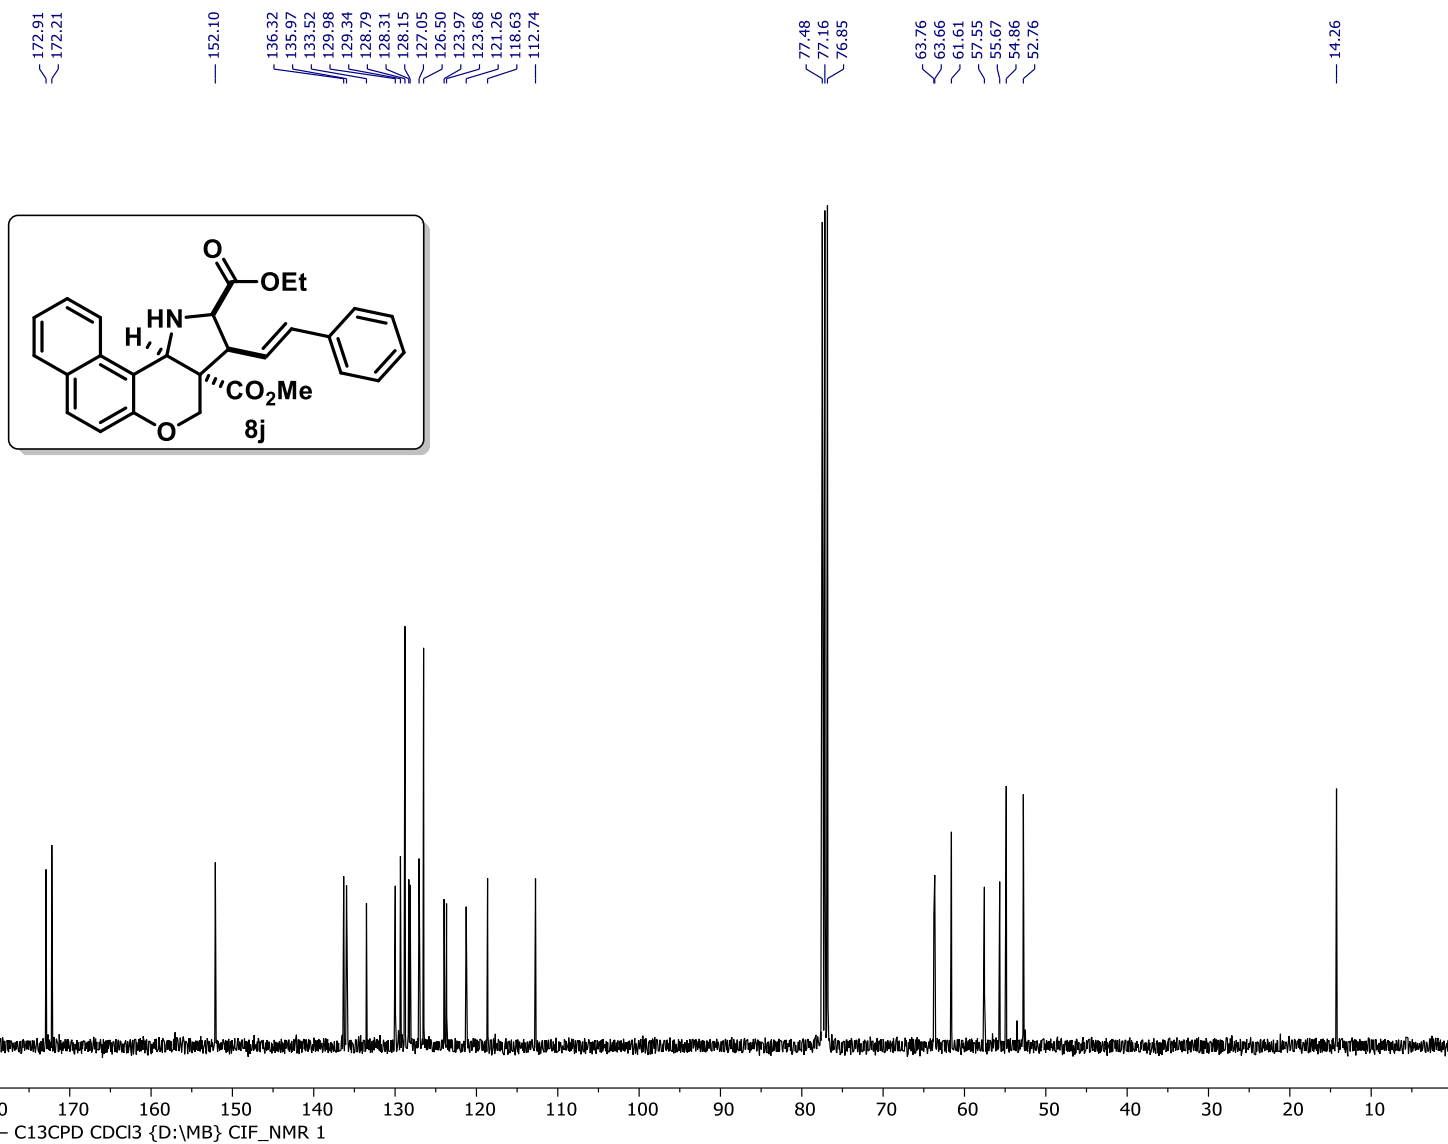

## 2-Ethyl 3a-methyl (*E*)-8-chloro-3-styryl-1,2,3,9b-tetrahydrochromeno[4,3-b]pyrrole-2,3a(4*H*)-dicarboxylate (8k):

VA-VB-F-15.3.fid

PROTON CDCl<sub>3</sub> {D:\MB\CIF\_NMR\1

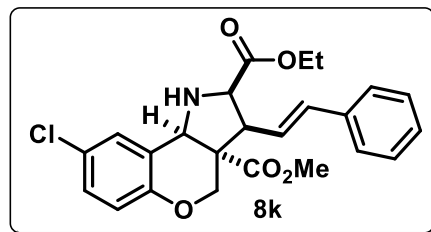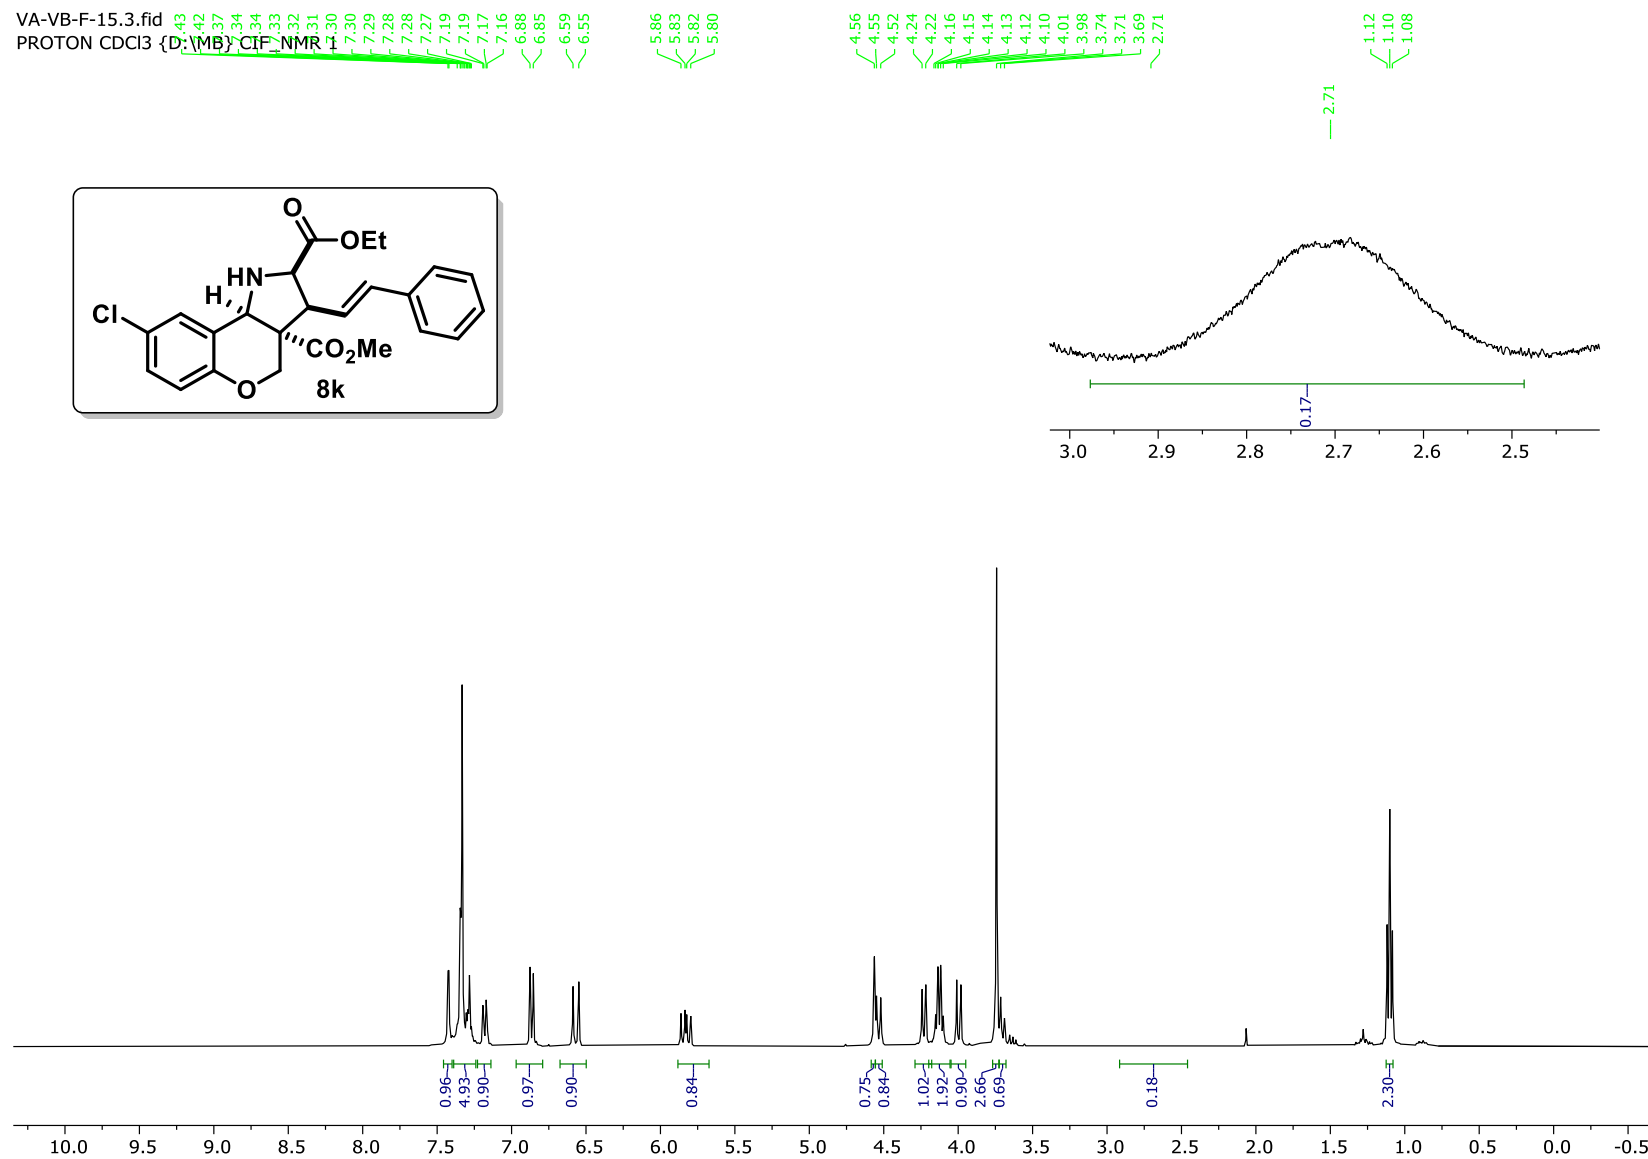

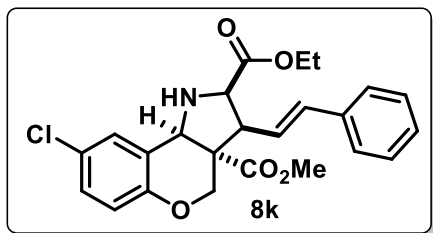

172.74  
171.57

152.92

136.22  
136.18  
130.43  
129.44  
128.82  
128.26  
126.53  
126.27  
122.08  
120.88  
118.70

77.48  
77.16  
76.84

64.47  
63.43  
61.75  
59.01  
55.36  
55.02  
52.91

14.27

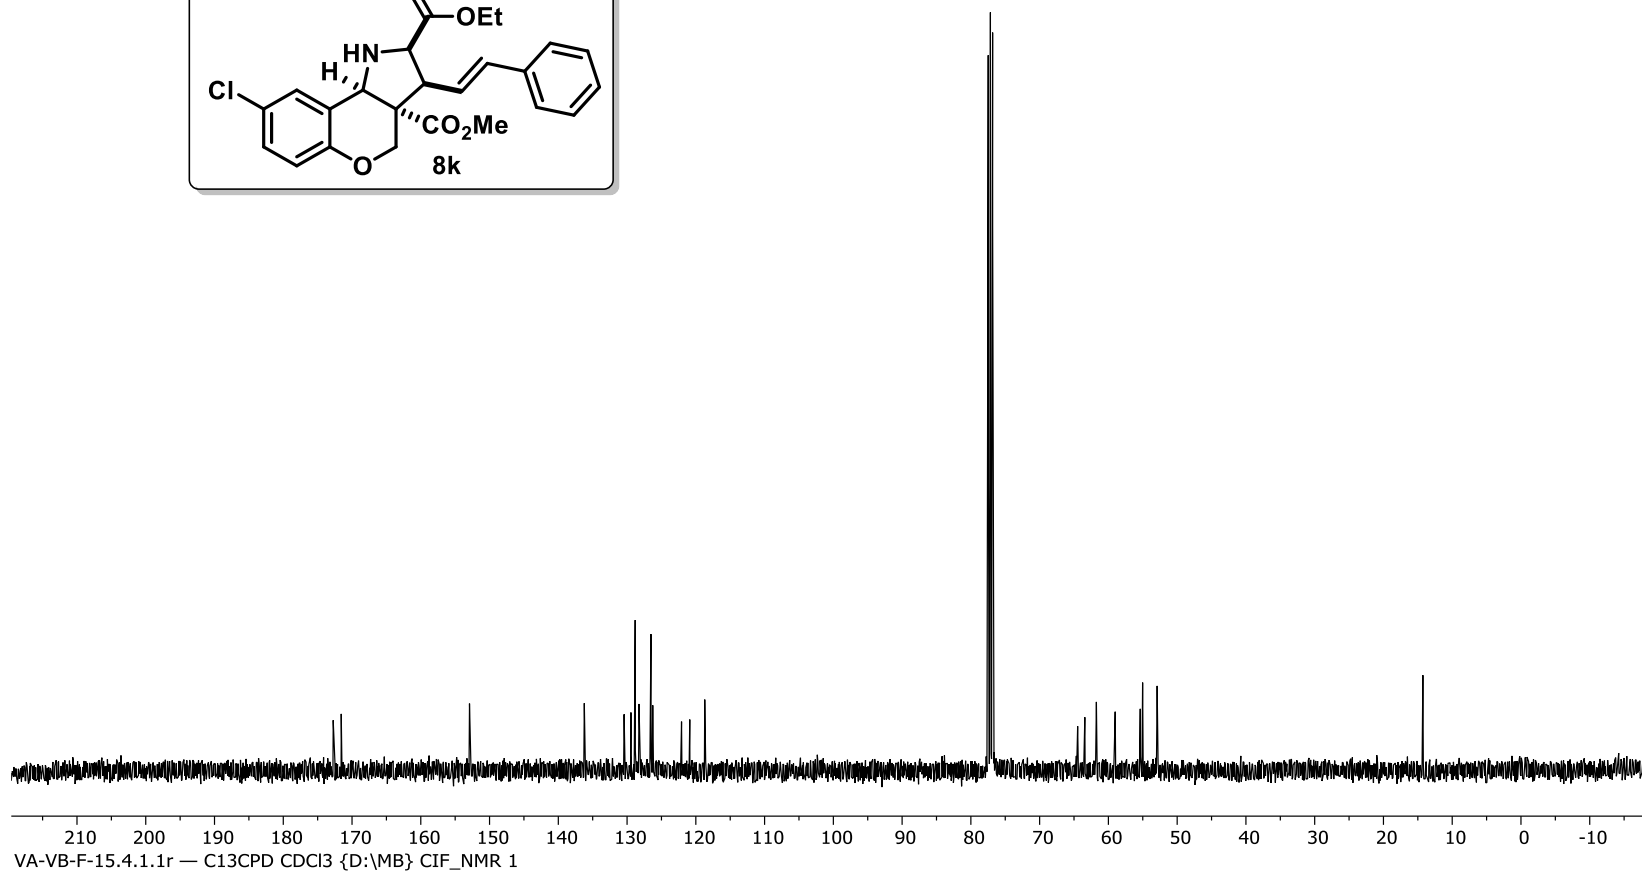



## 2-Ethyl 3a-methyl (*E*)-6,8-dichloro-3-styryl-1,2,3,9b-tetrahydrochromeno[4,3-b]pyrrole-2,3a(4*H*)-dicarboxylate (81)

VA-VB-F-18.1.1.1r

PROTON CDCl<sub>3</sub> {D:\MB} CIF\_NMR 1

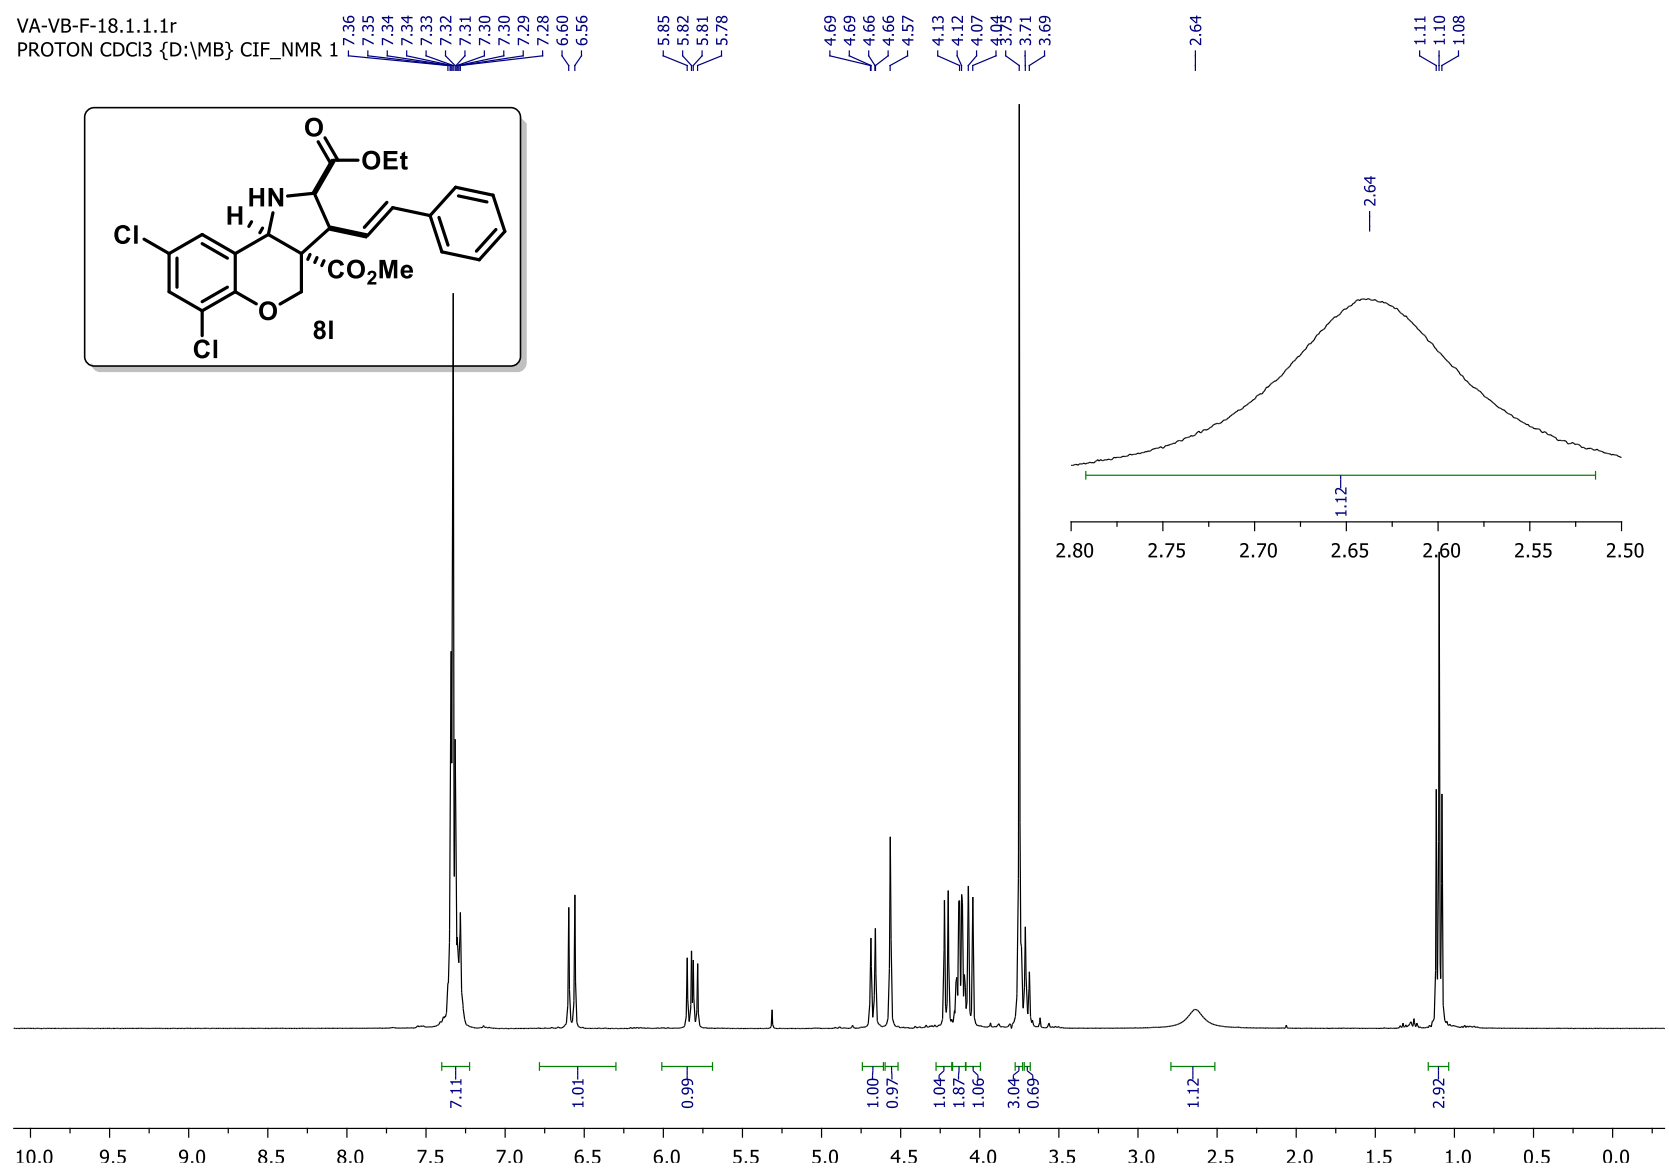

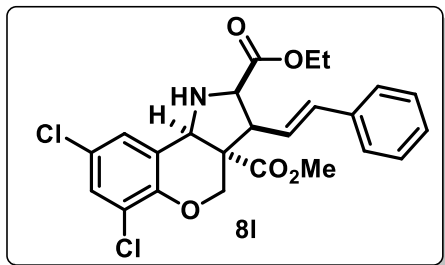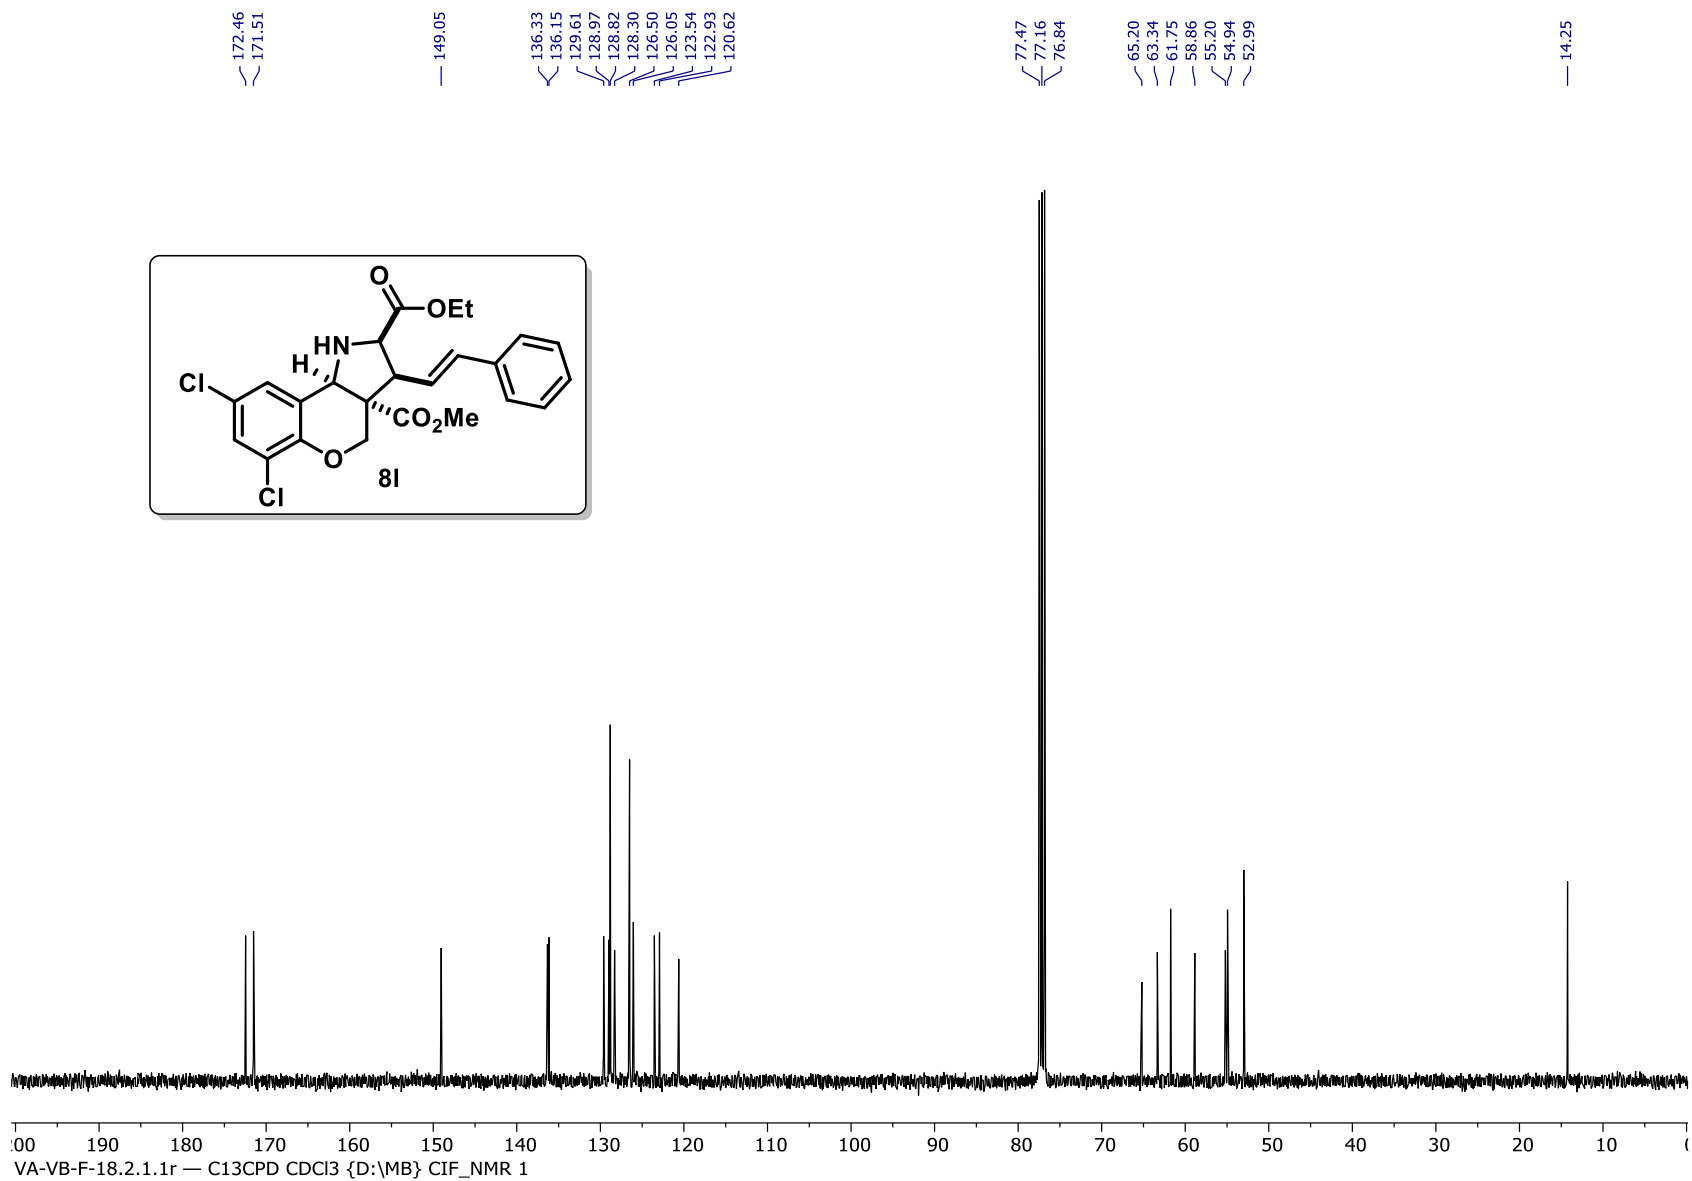

## 2-Ethyl 3a-methyl (*E*)-6-methoxy-3-styryl-1,2,3,9b-tetrahydrochromeno[4,3-b]pyrrole-2,3a(4*H*)-dicarboxylate (8m)

VA-VB-F-17.13.16  
 PROTON CDCl<sub>3</sub> (DMSO)-CIF-NMR

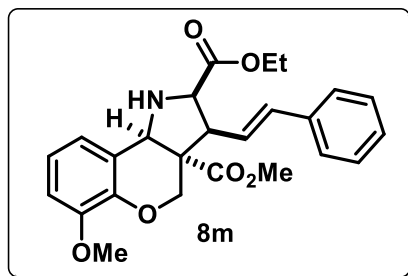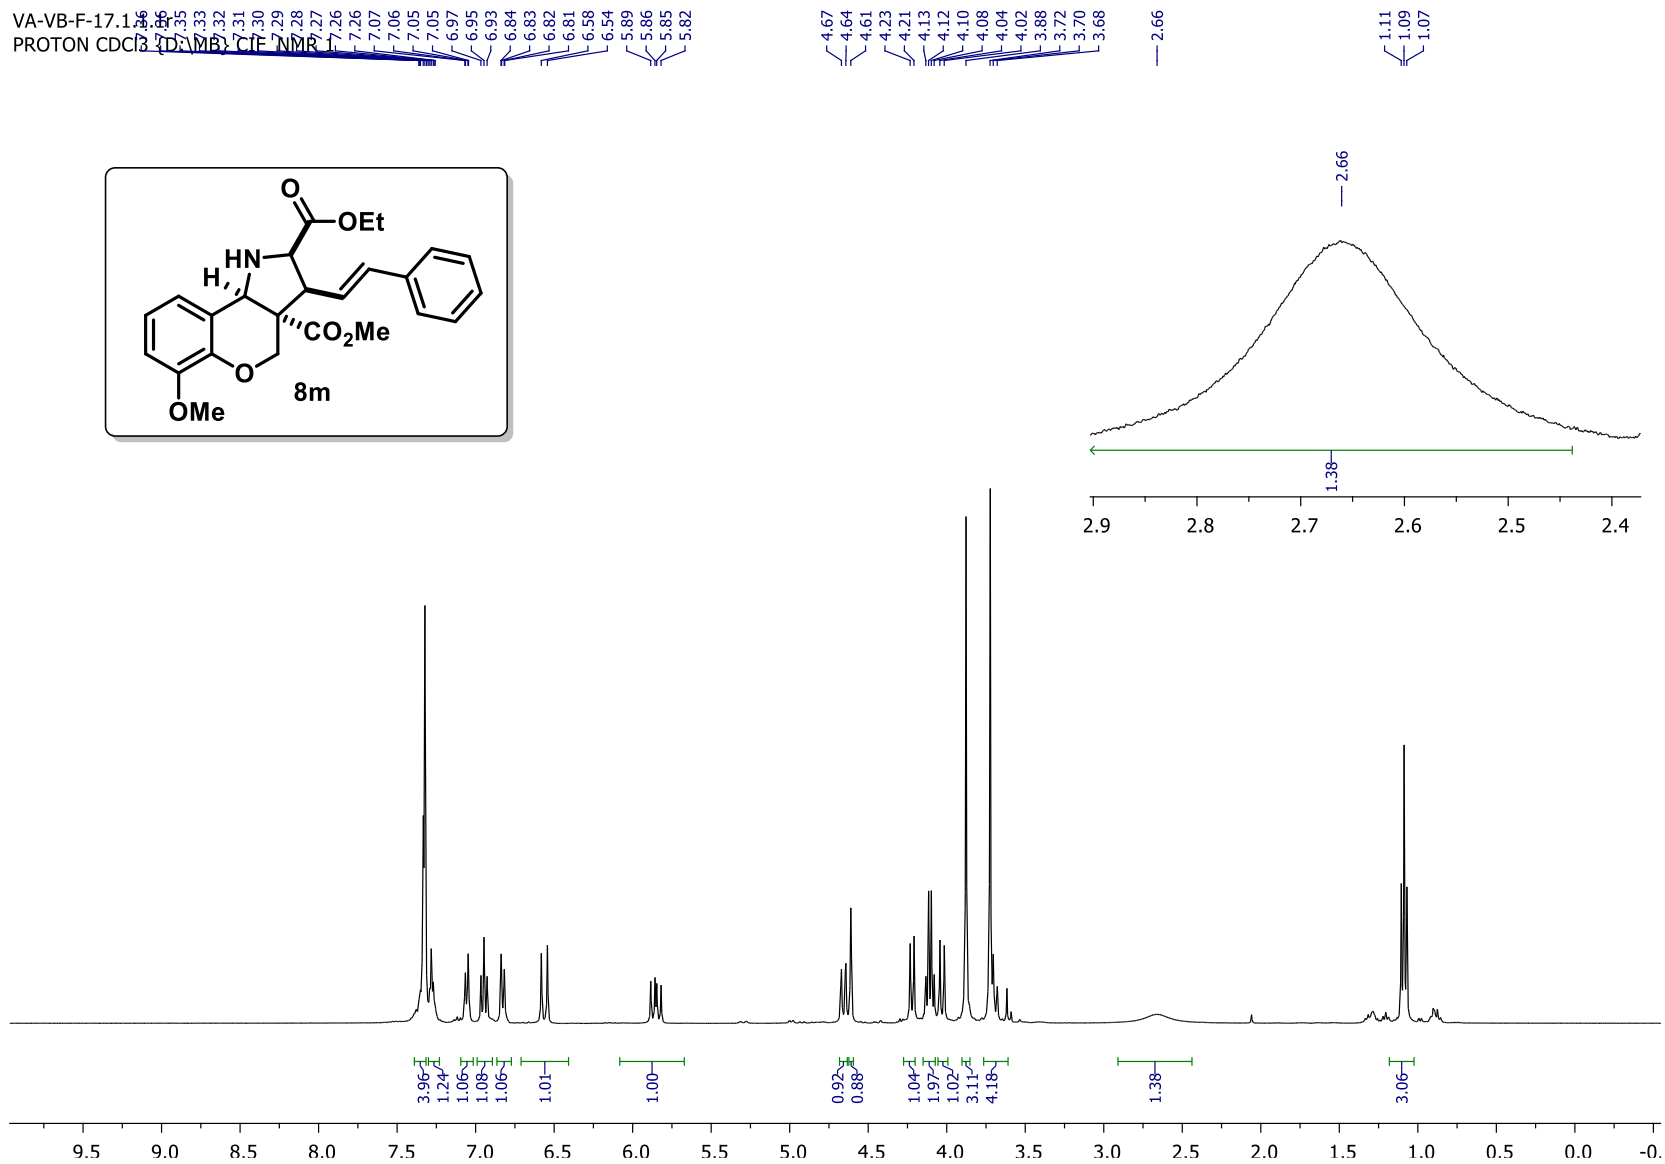

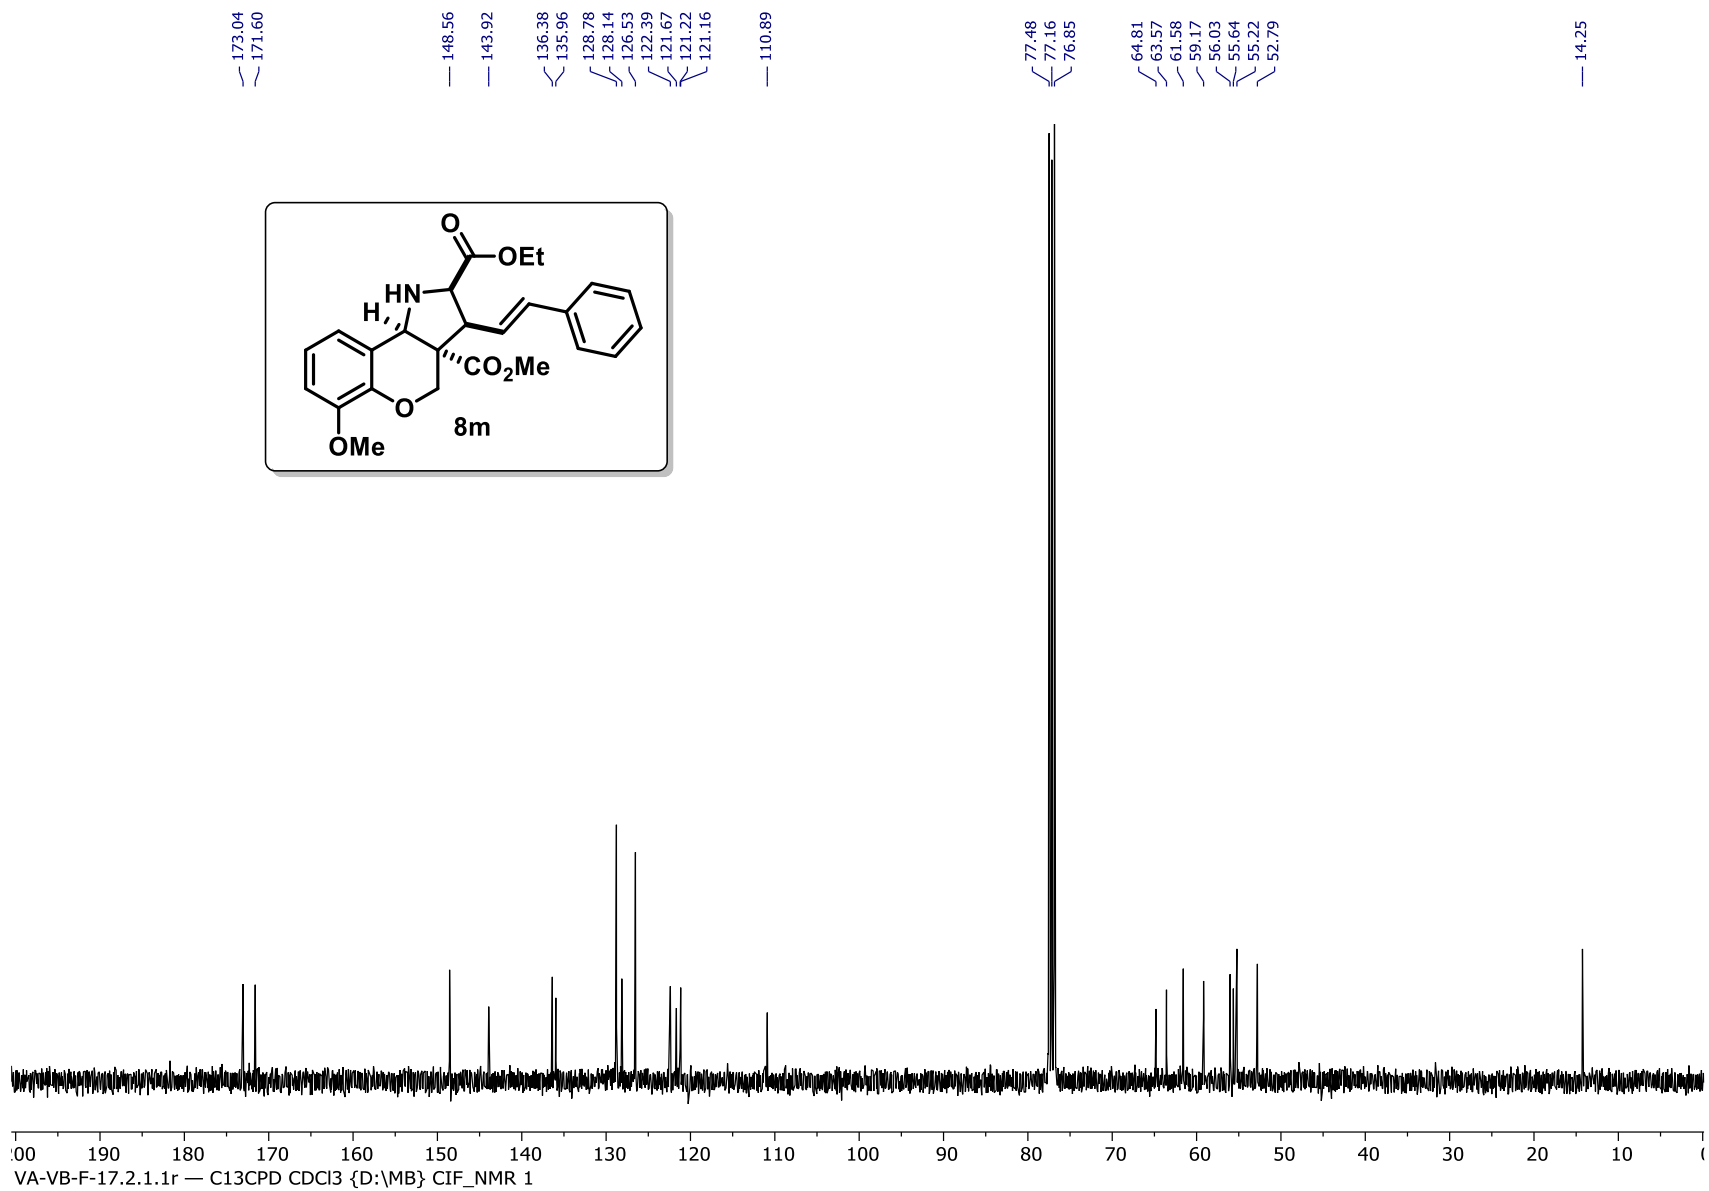

Diethyl (*E*)-3-styryl-1,2,3,9b-tetrahydrochromeno[4,3-b]pyrrole-2,3a(4*H*)-dicarboxylate (**8n**)

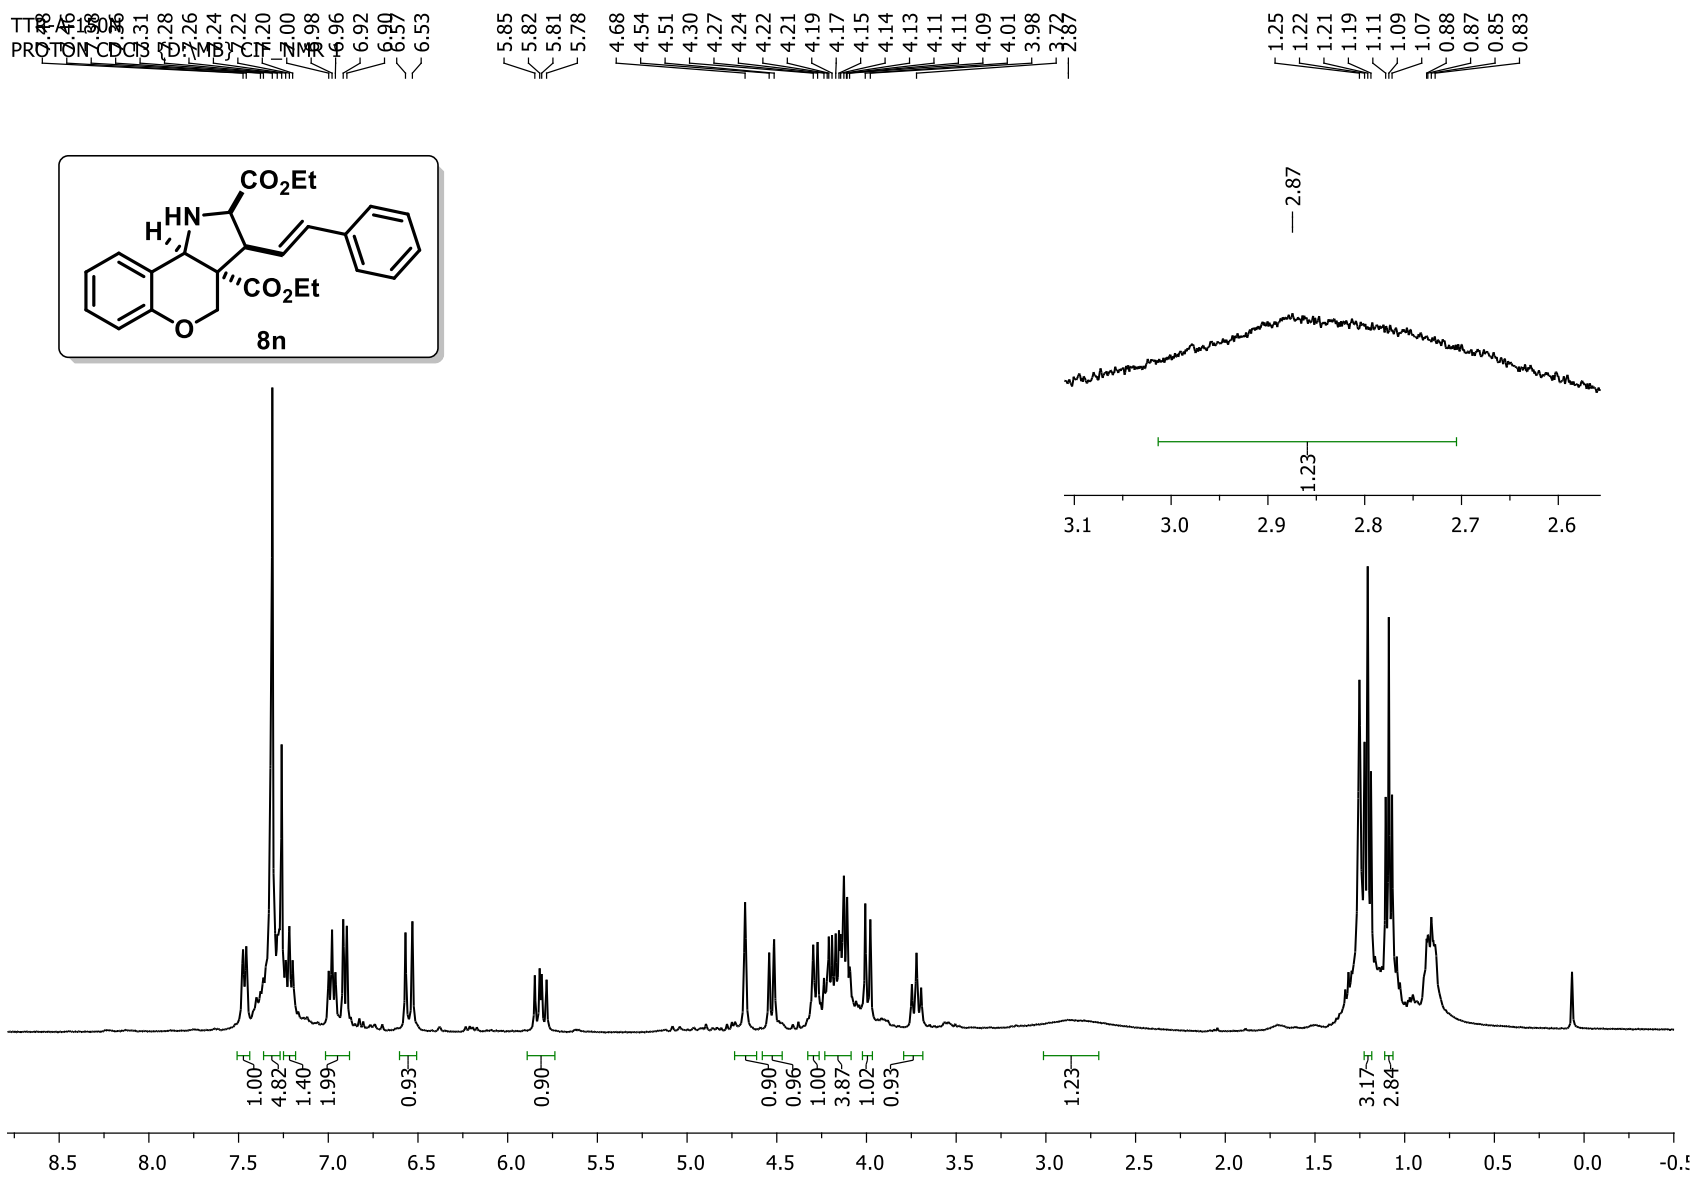

TTR-A-150N  
C13CPD CDCl3

172.00  
171.37

(DMSO-d6) CIF\_NMR

154.33

136.29  
136.24

129.60

128.84

128.27

125.83

125.83

120.87

119.90

117.30

77.48

76.84

64.24

63.09

61.96

61.73

59.10

55.22

55.03

14.28

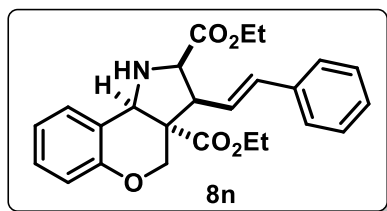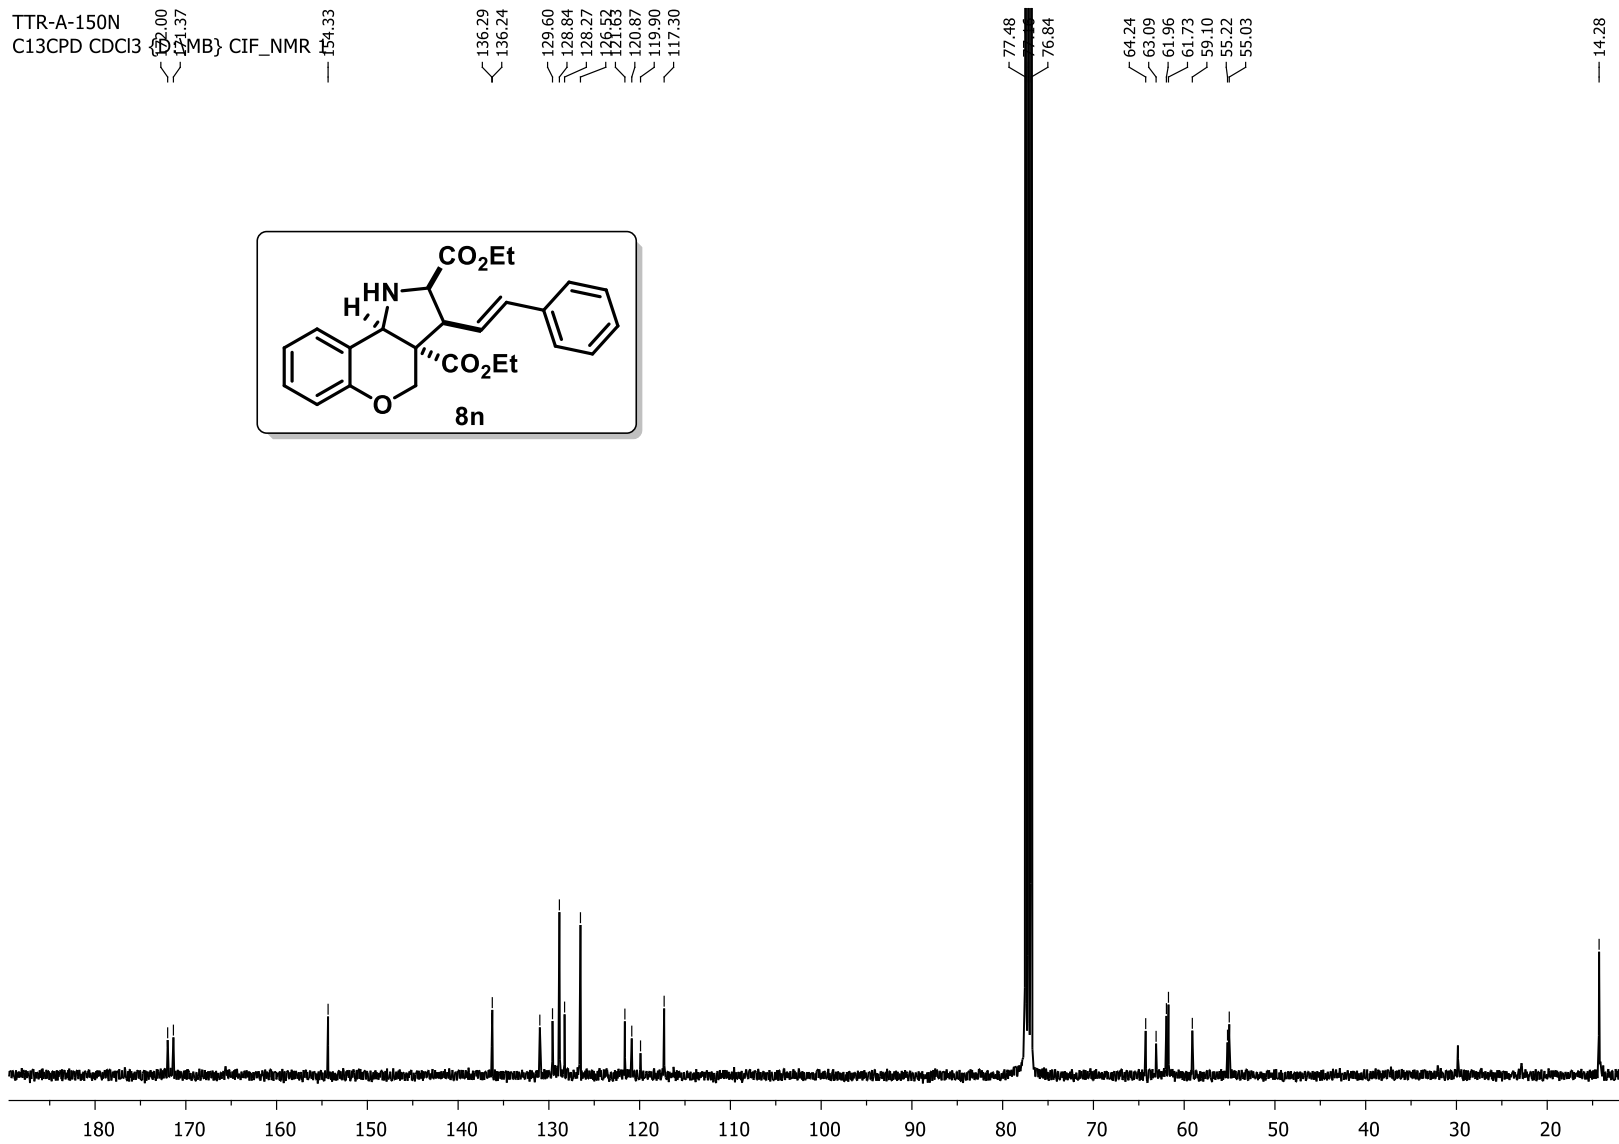

**Ethyl 2-methyl (*E*)-8-bromo-3-styryl-1,2,3,9b-tetrahydrochromeno[4,3-b]pyrrole-2,3a(4*H*)-dicarboxylate (8o)**

TTR-A-151  
 PROTON CDCl<sub>3</sub> {D:\MB} CIF

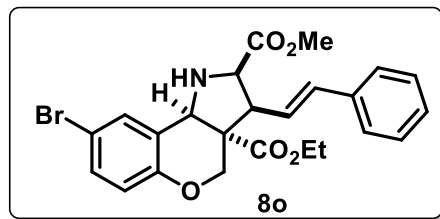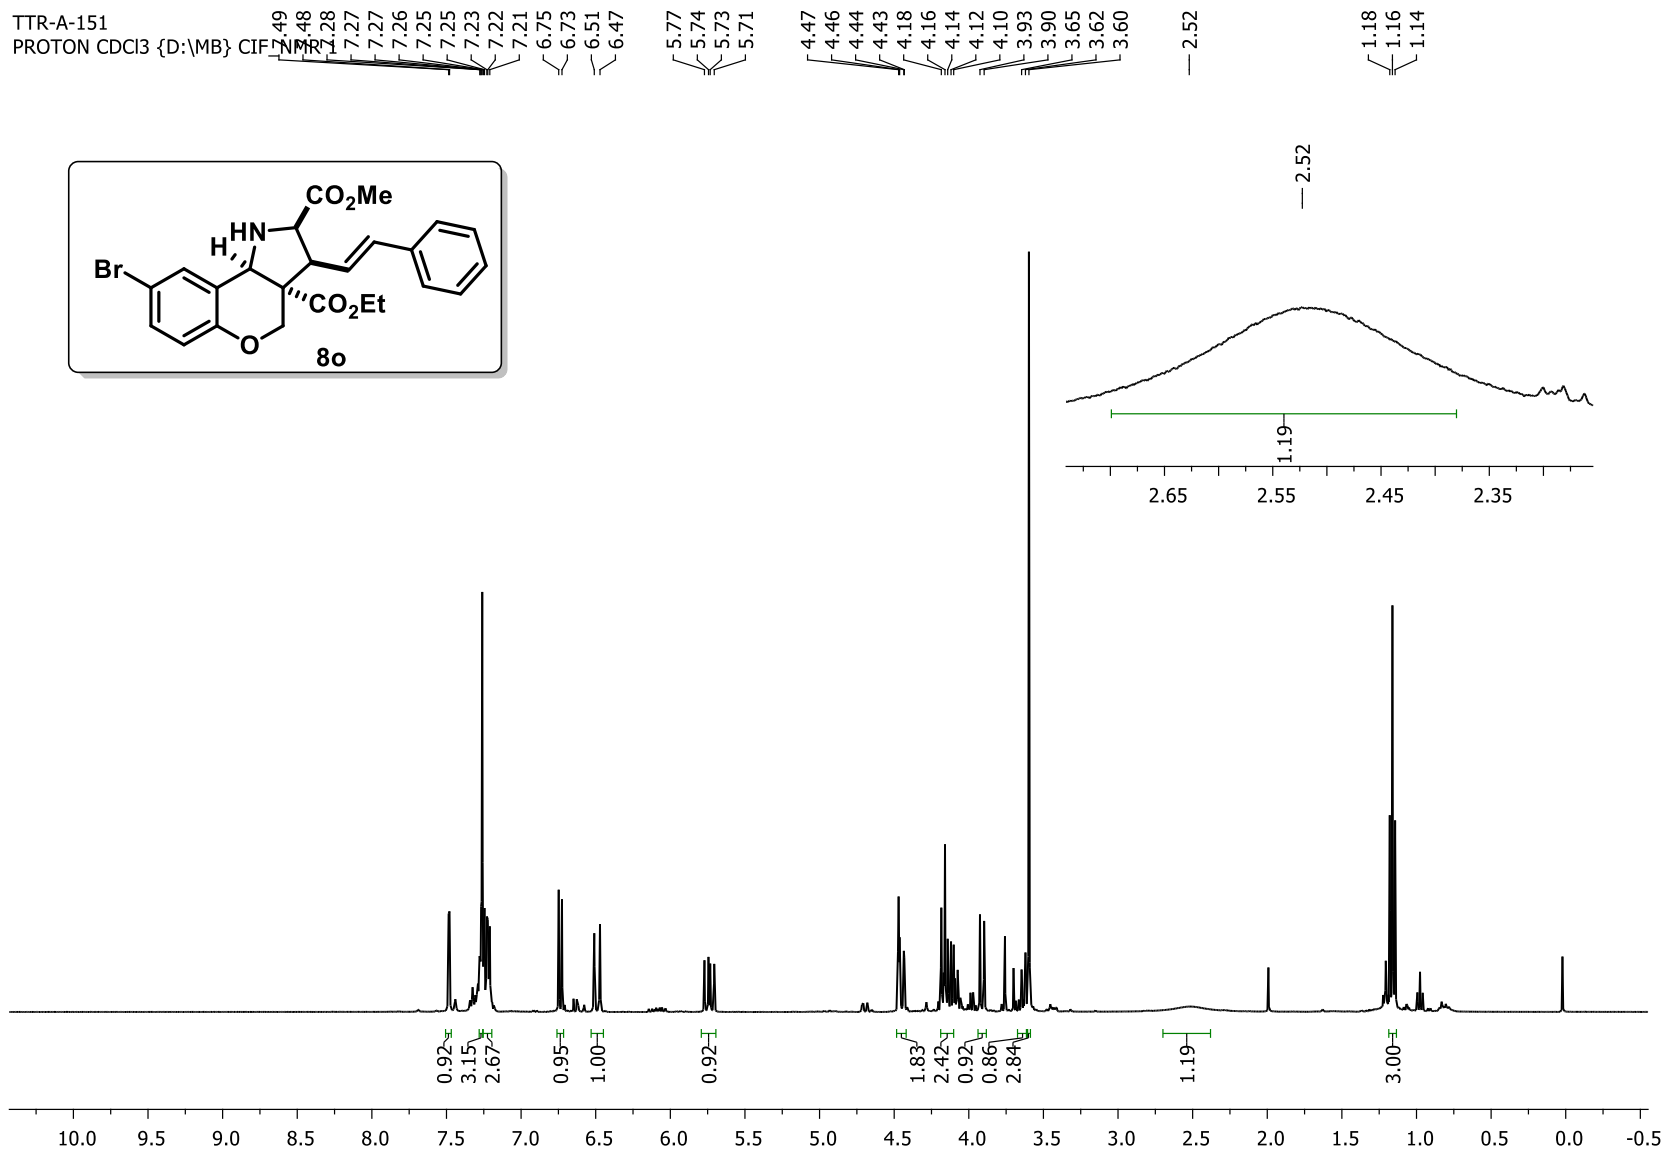

TTR-A-157  
C13CPD

172.17  
170.11  
153.49  
136.32  
136.23  
133.35  
132.23  
128.85  
128.25  
126.52  
122.79  
120.94  
119.09  
113.45

77.48  
77.16  
76.84  
64.48  
63.40  
61.70  
58.83  
55.31  
54.87  
52.53

14.29

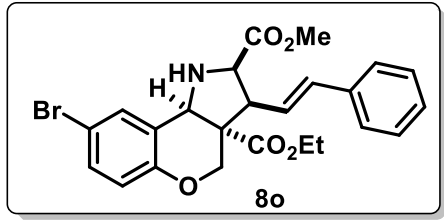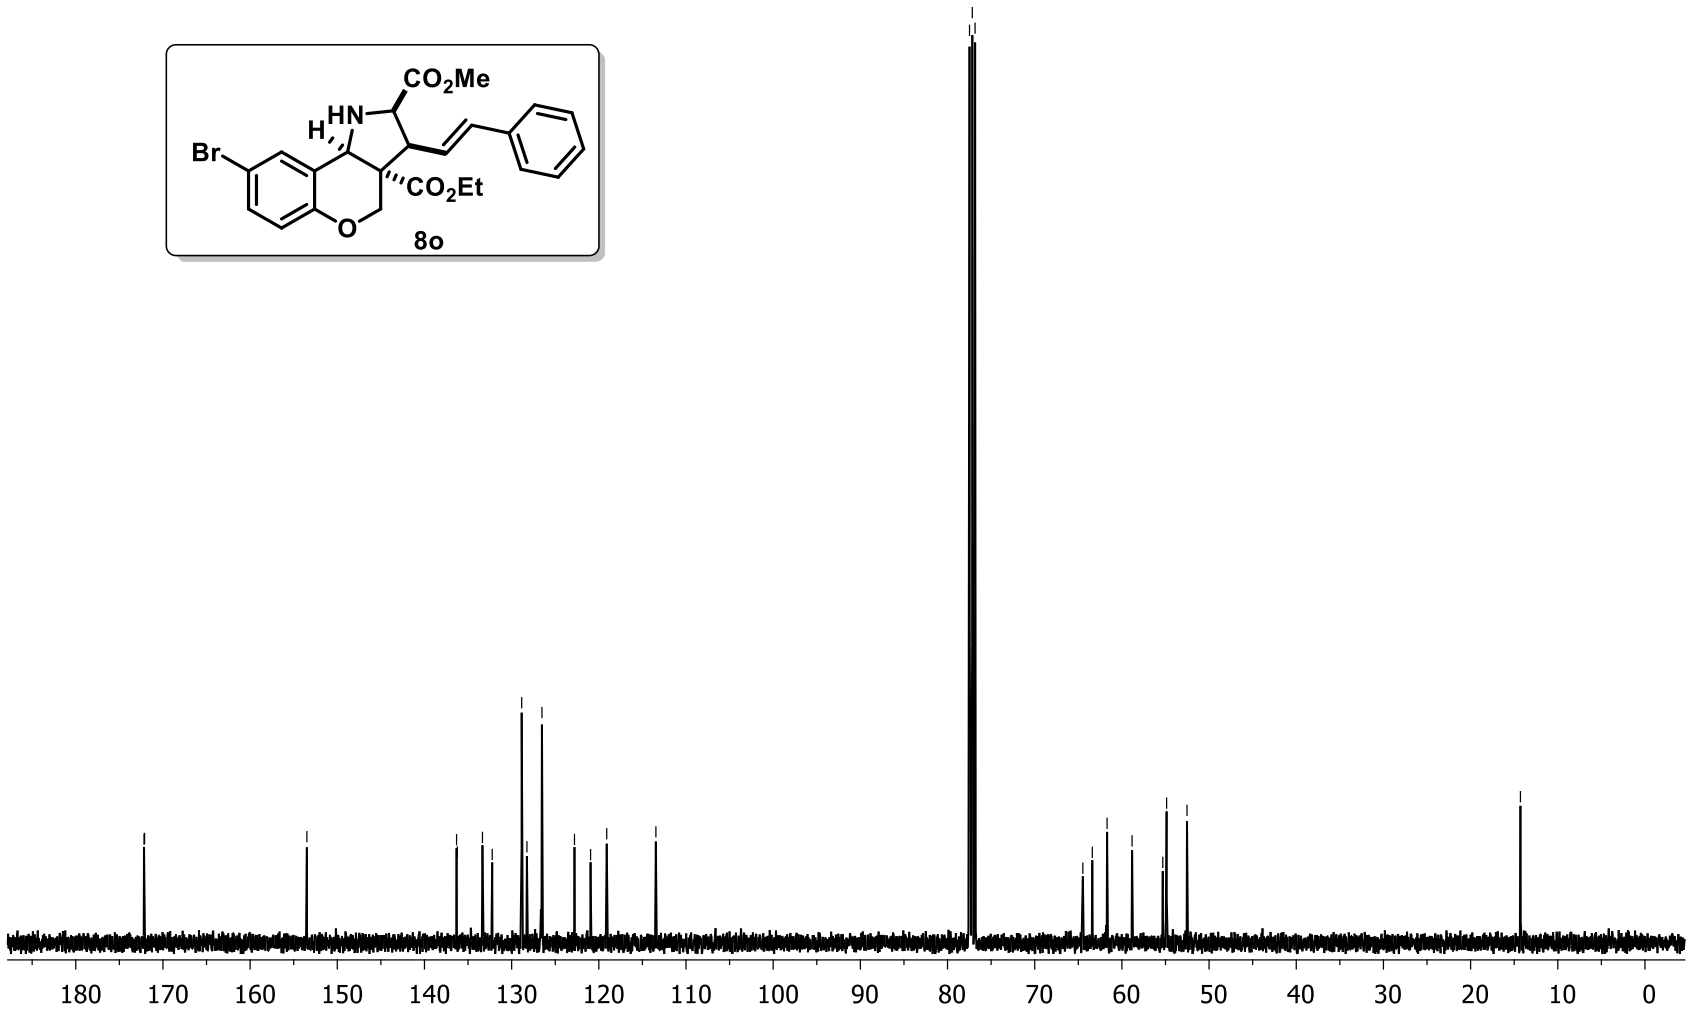



**Ethyl 2-methyl (*E*)-6,8-dichloro-3-styryl-1,2,3,9b-tetrahydrochromeno[4,3-b]pyrrole-2,3a(4*H*)-dicarboxylate (8p)**

TTR-A-153N

PROTON CDCI3 {D:\MB} CIF\_NMR 1

7.31  
7.29  
7.28  
7.27  
7.26

6.57  
6.54

5.81  
5.78  
5.77  
5.74

4.66  
4.63  
4.53  
4.24  
4.23  
4.21  
4.20  
4.17  
4.15

4.05  
3.70  
3.68  
3.65

— 2.64

1.23  
1.21  
1.19

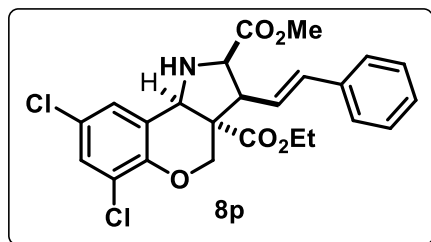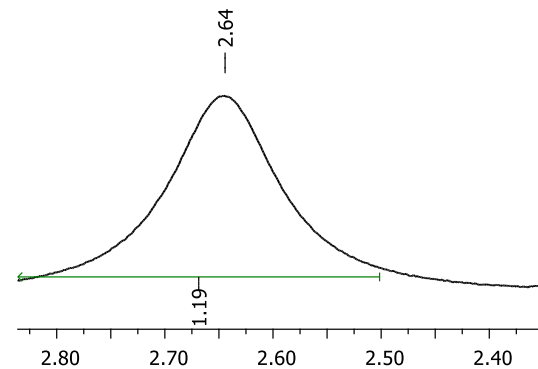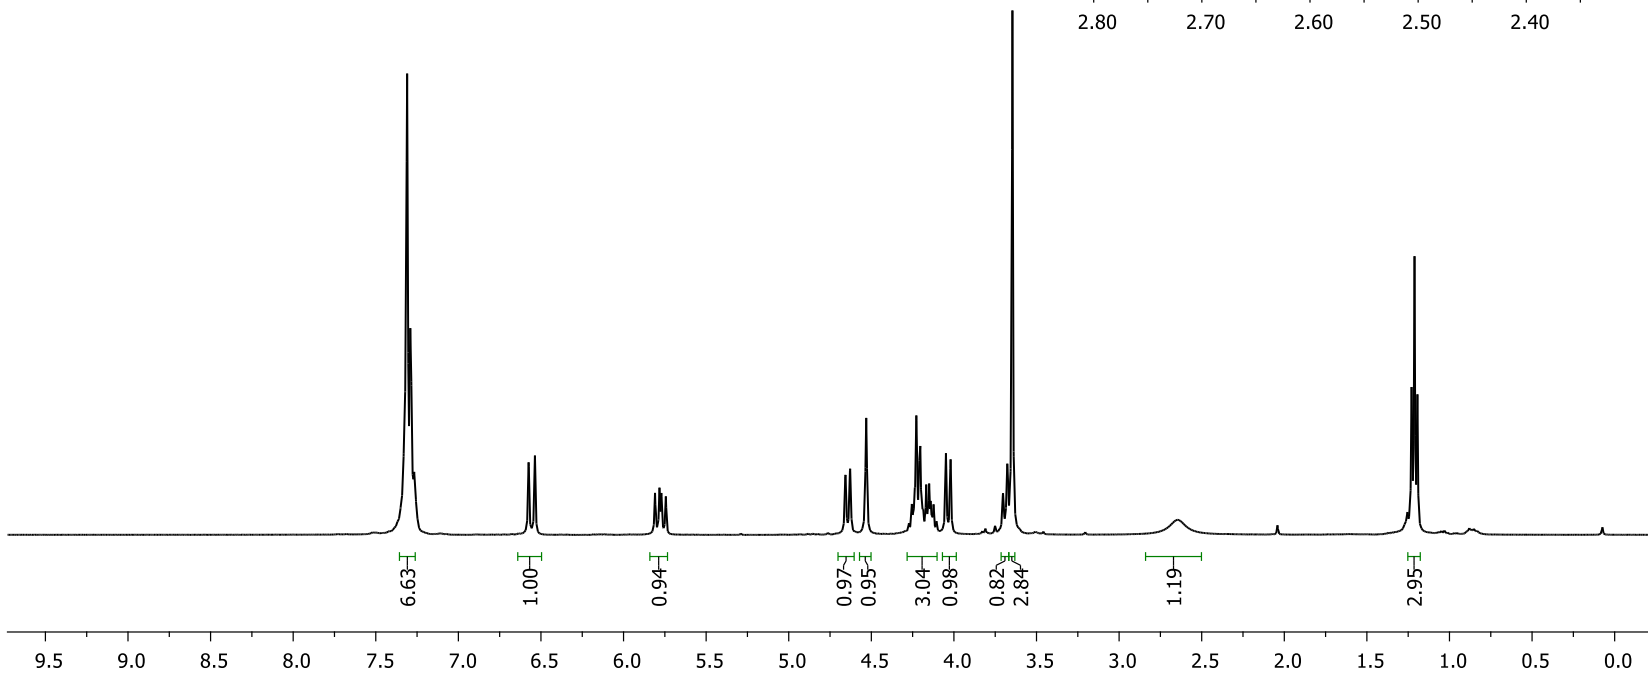

TTR-A-153N  
C13CPD CDCl3 {DMSO} CIF\_NMR 1

172.10  
171.81

149.07

136.44  
136.23  
129.58  
128.95  
128.85  
128.29  
126.50  
125.97  
123.54  
122.88  
120.61

77.48  
77.16  
76.84

65.20  
63.24  
61.82  
58.74  
55.07  
54.77  
52.57

14.25

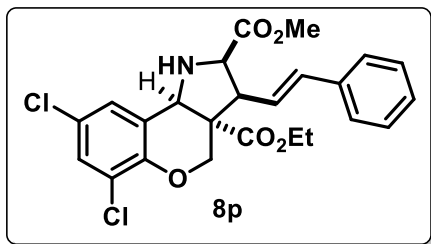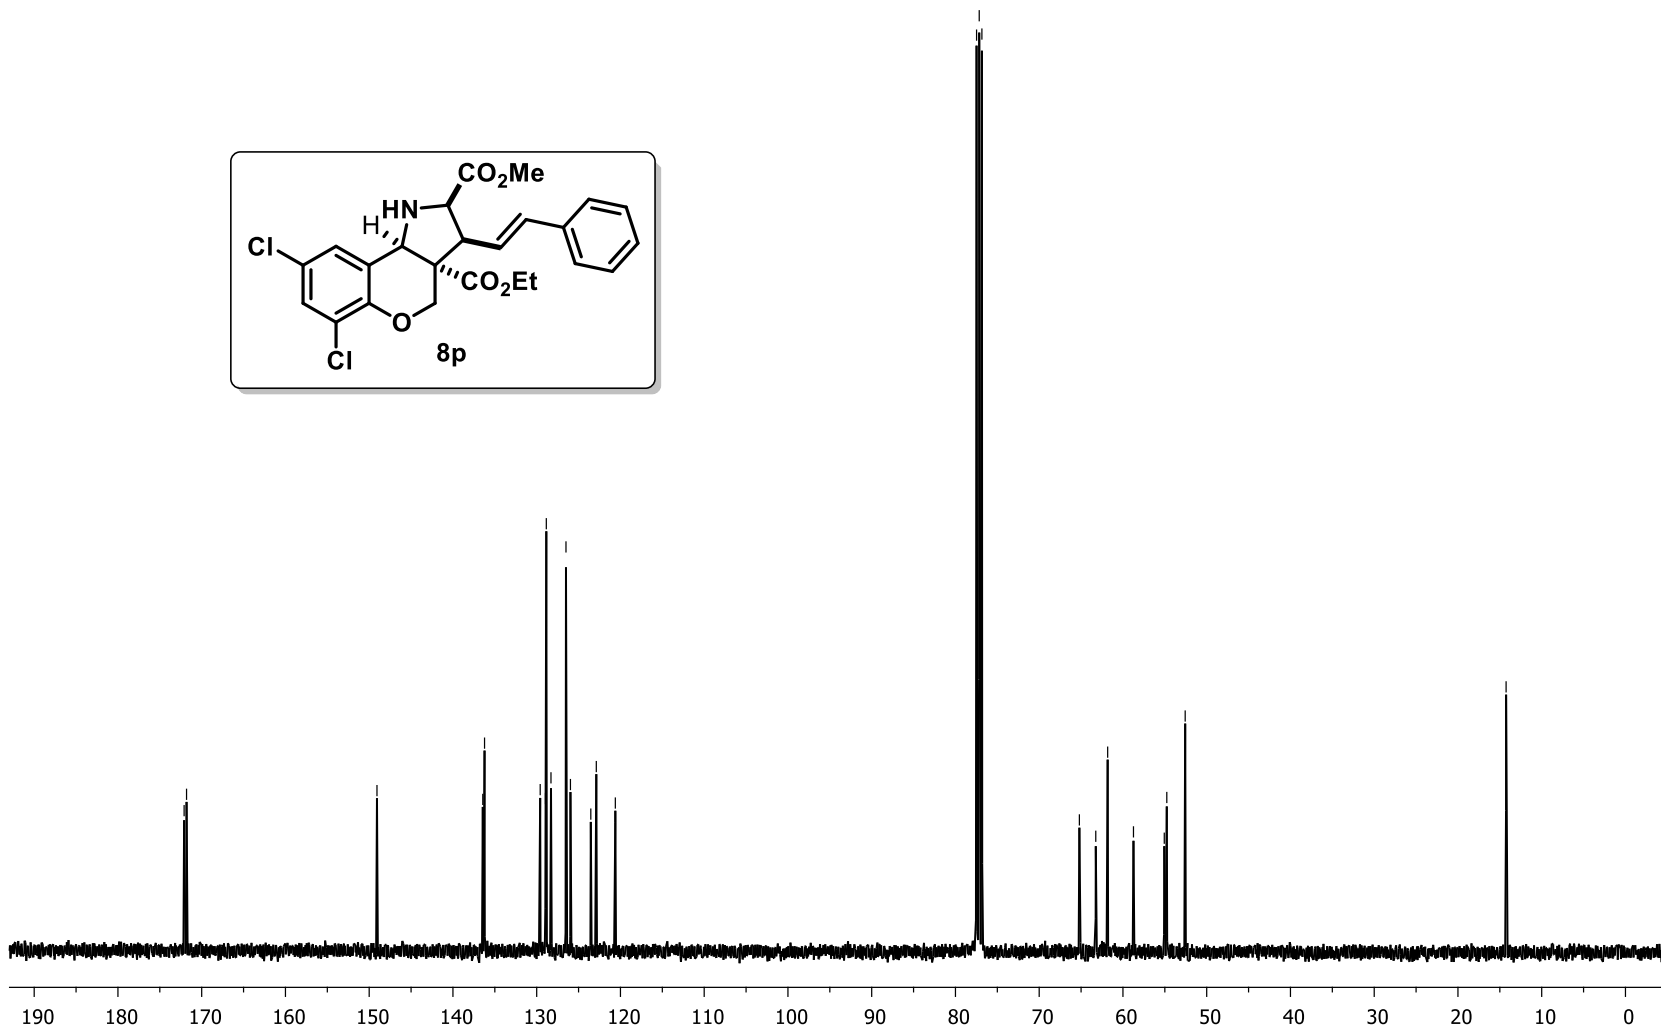

Diethyl (*E*)-6,8-dichloro-3-styryl-1,2,3,9b-tetrahydrochromeno[4,3-b]pyrrole-2,3a(4*H*)-dicarboxylate (8q)

TTR-A-154  
PROTON CDCl<sub>3</sub> {D:\MB} CIF\_NMR

7.33  
7.32  
7.30  
7.29  
7.26  
6.57  
6.54  
5.82  
5.79  
5.78  
5.76  
4.54  
4.23  
4.21  
4.17  
4.15  
4.12  
4.12  
4.11  
4.10  
4.05  
3.97  
3.69  
3.66

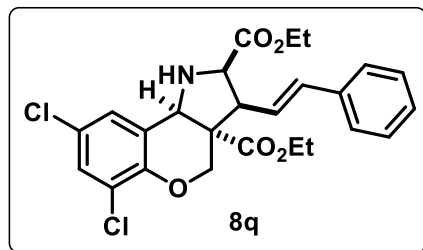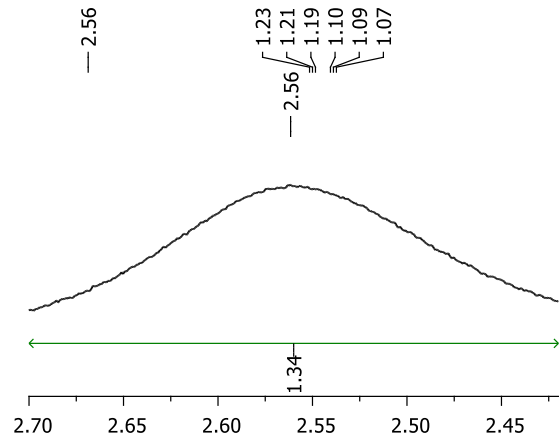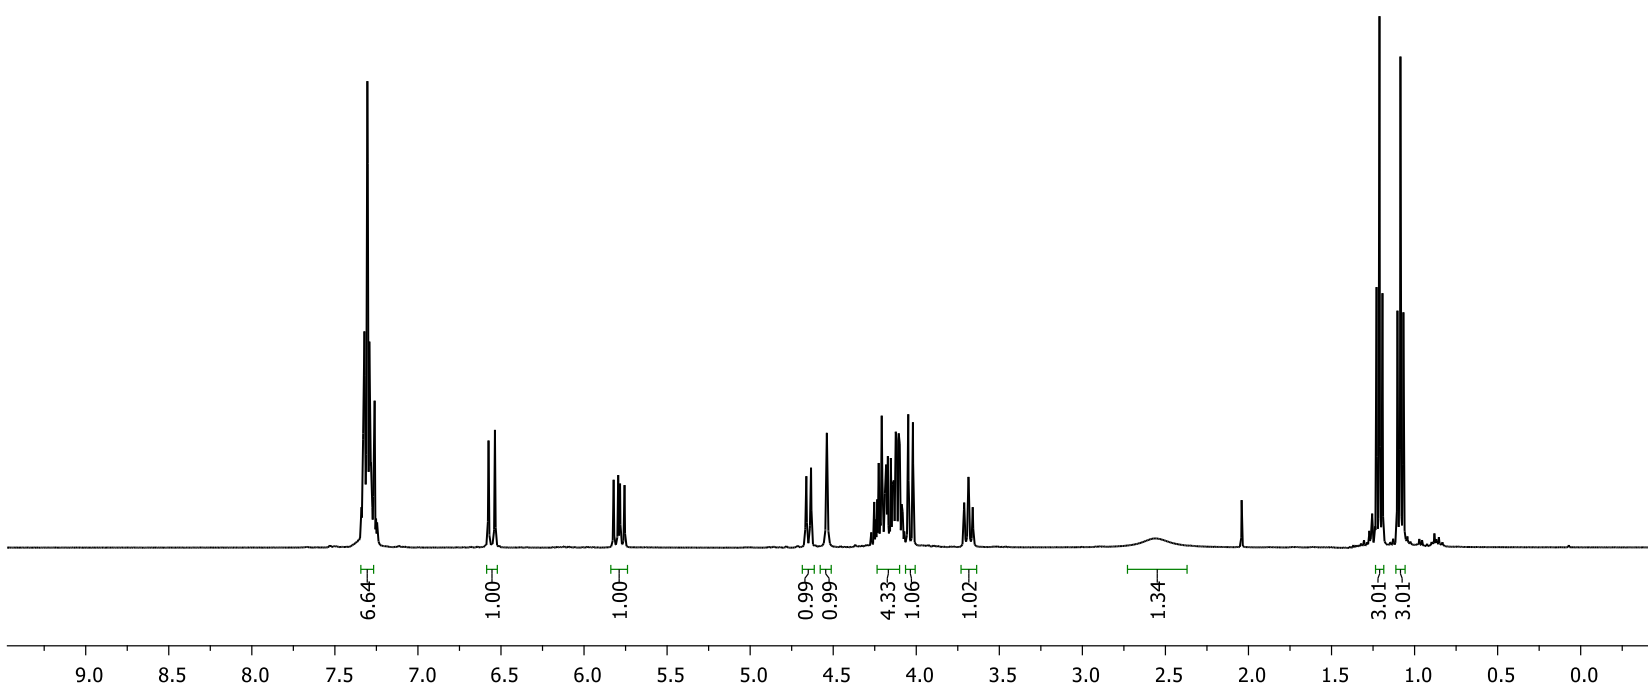

TTR-A-154.82  
C13CPD CDCl<sub>3</sub> (D:\MB) CIF

171.82  
171.57  
149.08  
136.36  
136.18  
129.60  
128.98  
128.83  
128.28  
126.46  
125.99  
123.49  
122.89  
120.74

77.48  
77.16  
76.84  
65.21  
63.23  
61.83  
61.79  
58.74  
55.14  
54.83

14.27

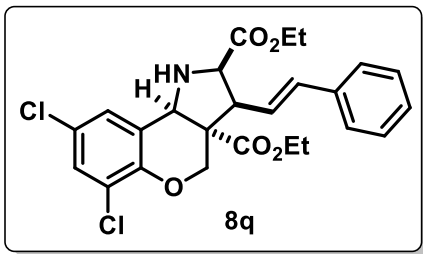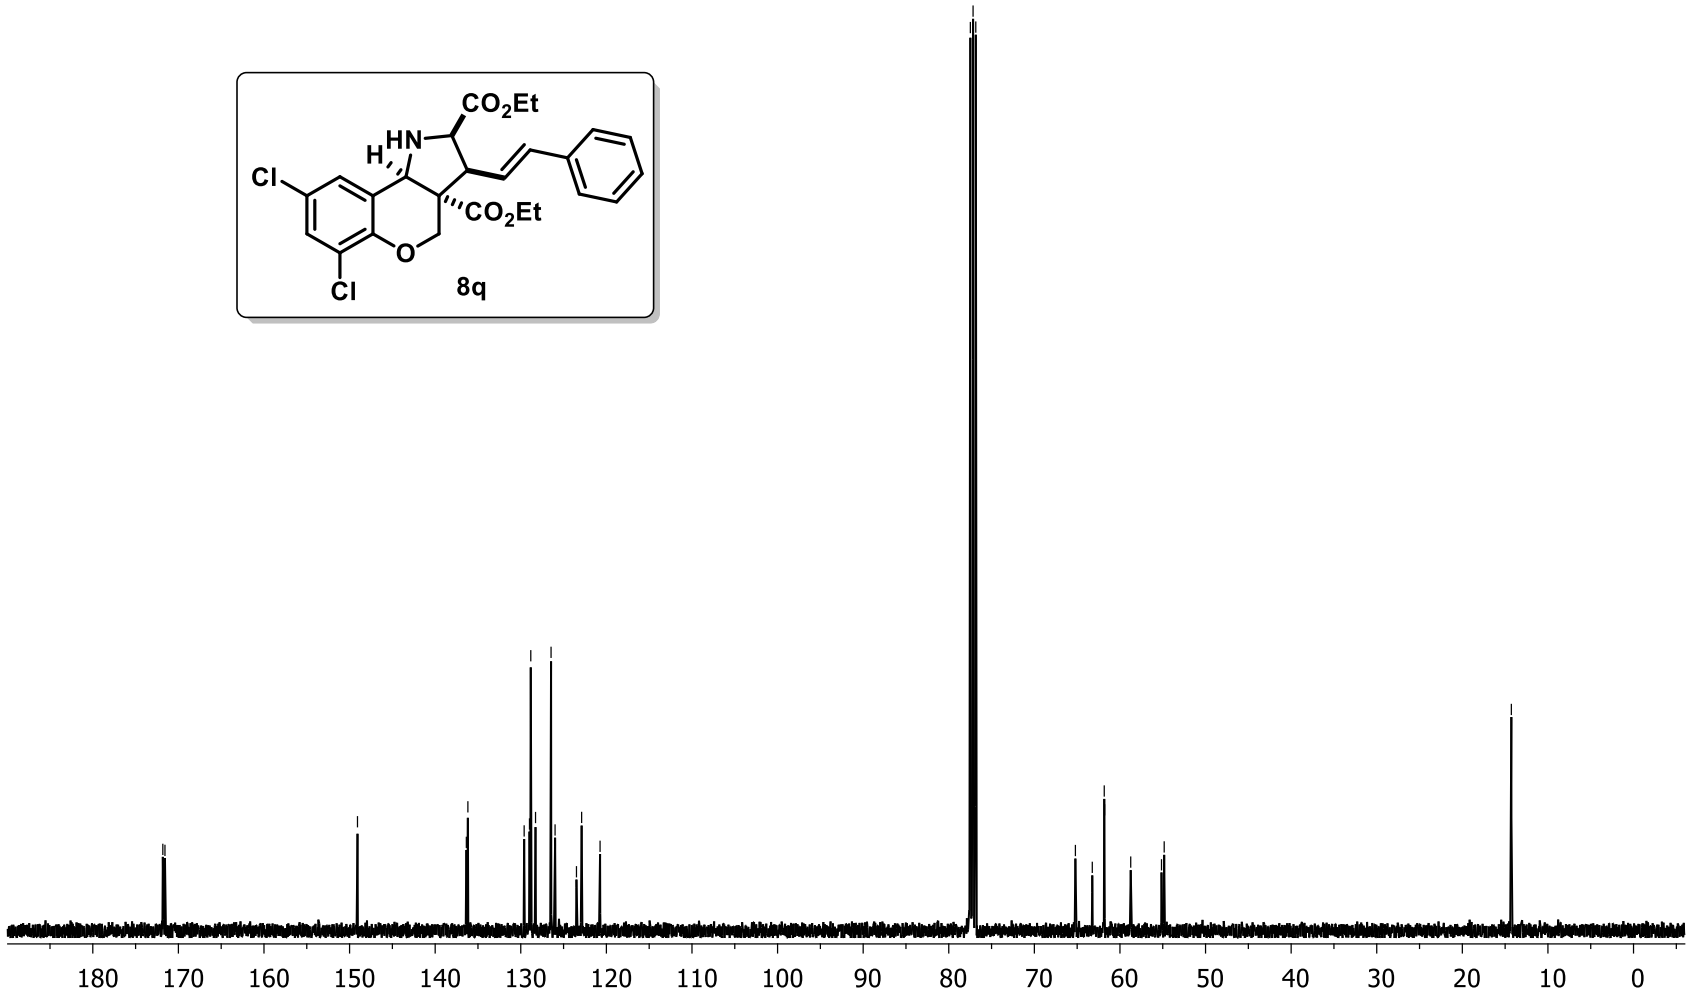

Diethyl (*E*)-8-chloro-3-styryl-1,2,3,9b-tetrahydrochromeno[4,3-b]pyrrole-2,3a(4*H*)-dicarboxylate (**8r**)

<sup>1</sup>H NMR (CDCl<sub>3</sub>, 40 °C): δ 7.27 (d, 1H), 7.26 (d, 1H), 7.24 (d, 1H), 7.17 (d, 1H), 7.16 (d, 1H), 7.14 (d, 1H), 7.14 (d, 1H), 6.85 (d, 1H), 6.83 (d, 1H), 6.56 (d, 1H), 5.83 (d, 1H), 5.80 (d, 1H), 5.79 (d, 1H), 5.77 (d, 1H), 4.53 (m, 1H), 4.52 (m, 1H), 4.49 (m, 1H), 4.49 (m, 1H), 4.21 (m, 1H), 4.21 (m, 1H), 4.19 (m, 1H), 4.17 (m, 1H), 4.15 (m, 1H), 4.14 (m, 1H), 4.14 (m, 1H), 4.12 (m, 1H), 4.12 (m, 1H), 4.10 (m, 1H), 4.10 (m, 1H), 3.97 (m, 1H), 3.95 (m, 1H), 3.70 (m, 1H), 3.68 (m, 1H), 1.23 (t, 3H), 1.21 (t, 3H), 1.19 (t, 3H), 1.10 (t, 3H), 1.09 (t, 3H), 1.07 (t, 3H)

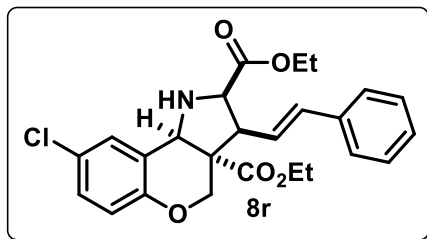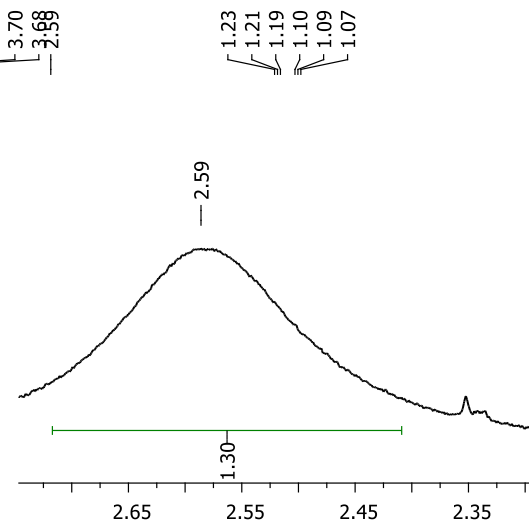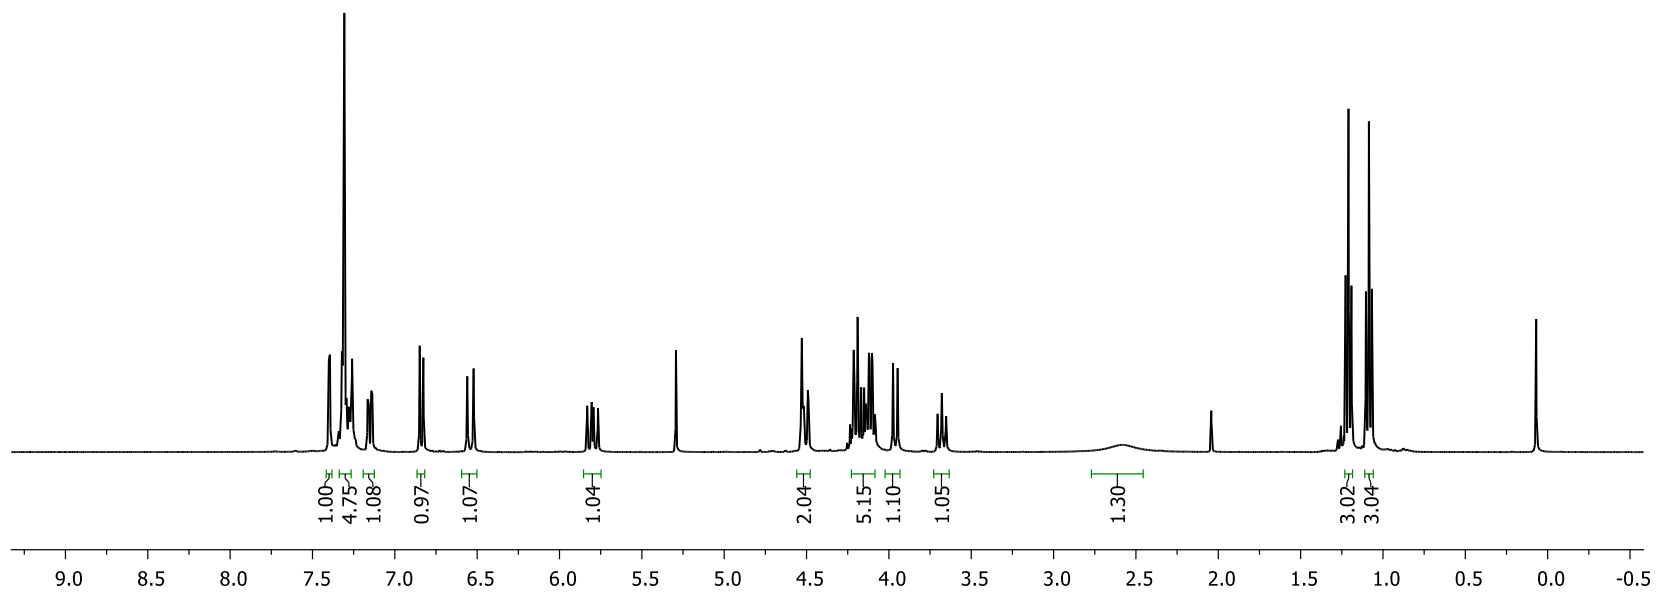

MSP-717  
C13CPD CDCI3

172.12  
171.65

152.95

136.25

136.14

130.41

129.38

128.82

128.22

126.47

126.18

122.16

121.04

118.65

77.48

77.46

76.84

64.50

63.35

61.74

61.69

58.88

55.37

54.92

14.29

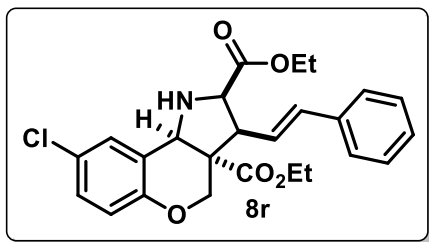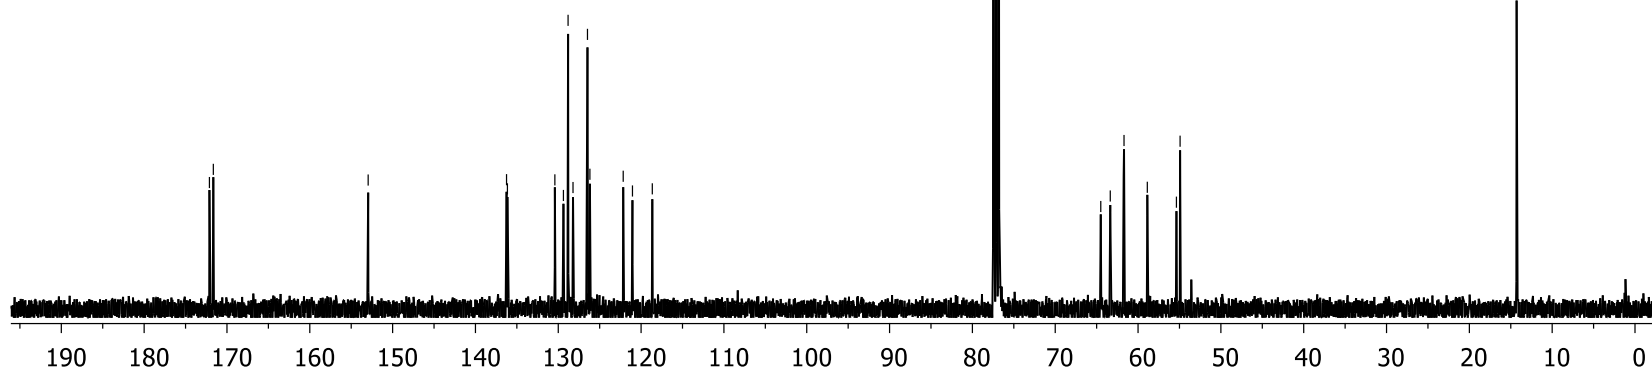



RK-CNM-N-ME-84  
C13CPD CDCl3

172.94  
172.03  
154.22  
NMR 1

136.27  
135.98  
130.77  
129.22  
128.71  
128.07  
126.42  
121.32  
121.05  
120.42  
117.10

77.36  
77.01  
76.72  
65.30  
64.19  
63.37  
59.24  
55.37  
55.12  
52.39

30.54

19.02

13.58

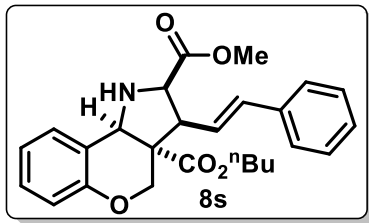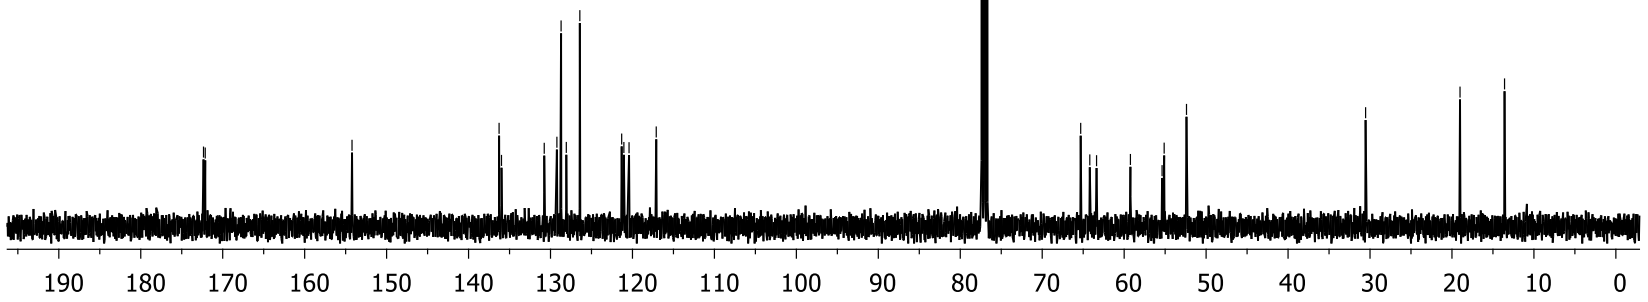





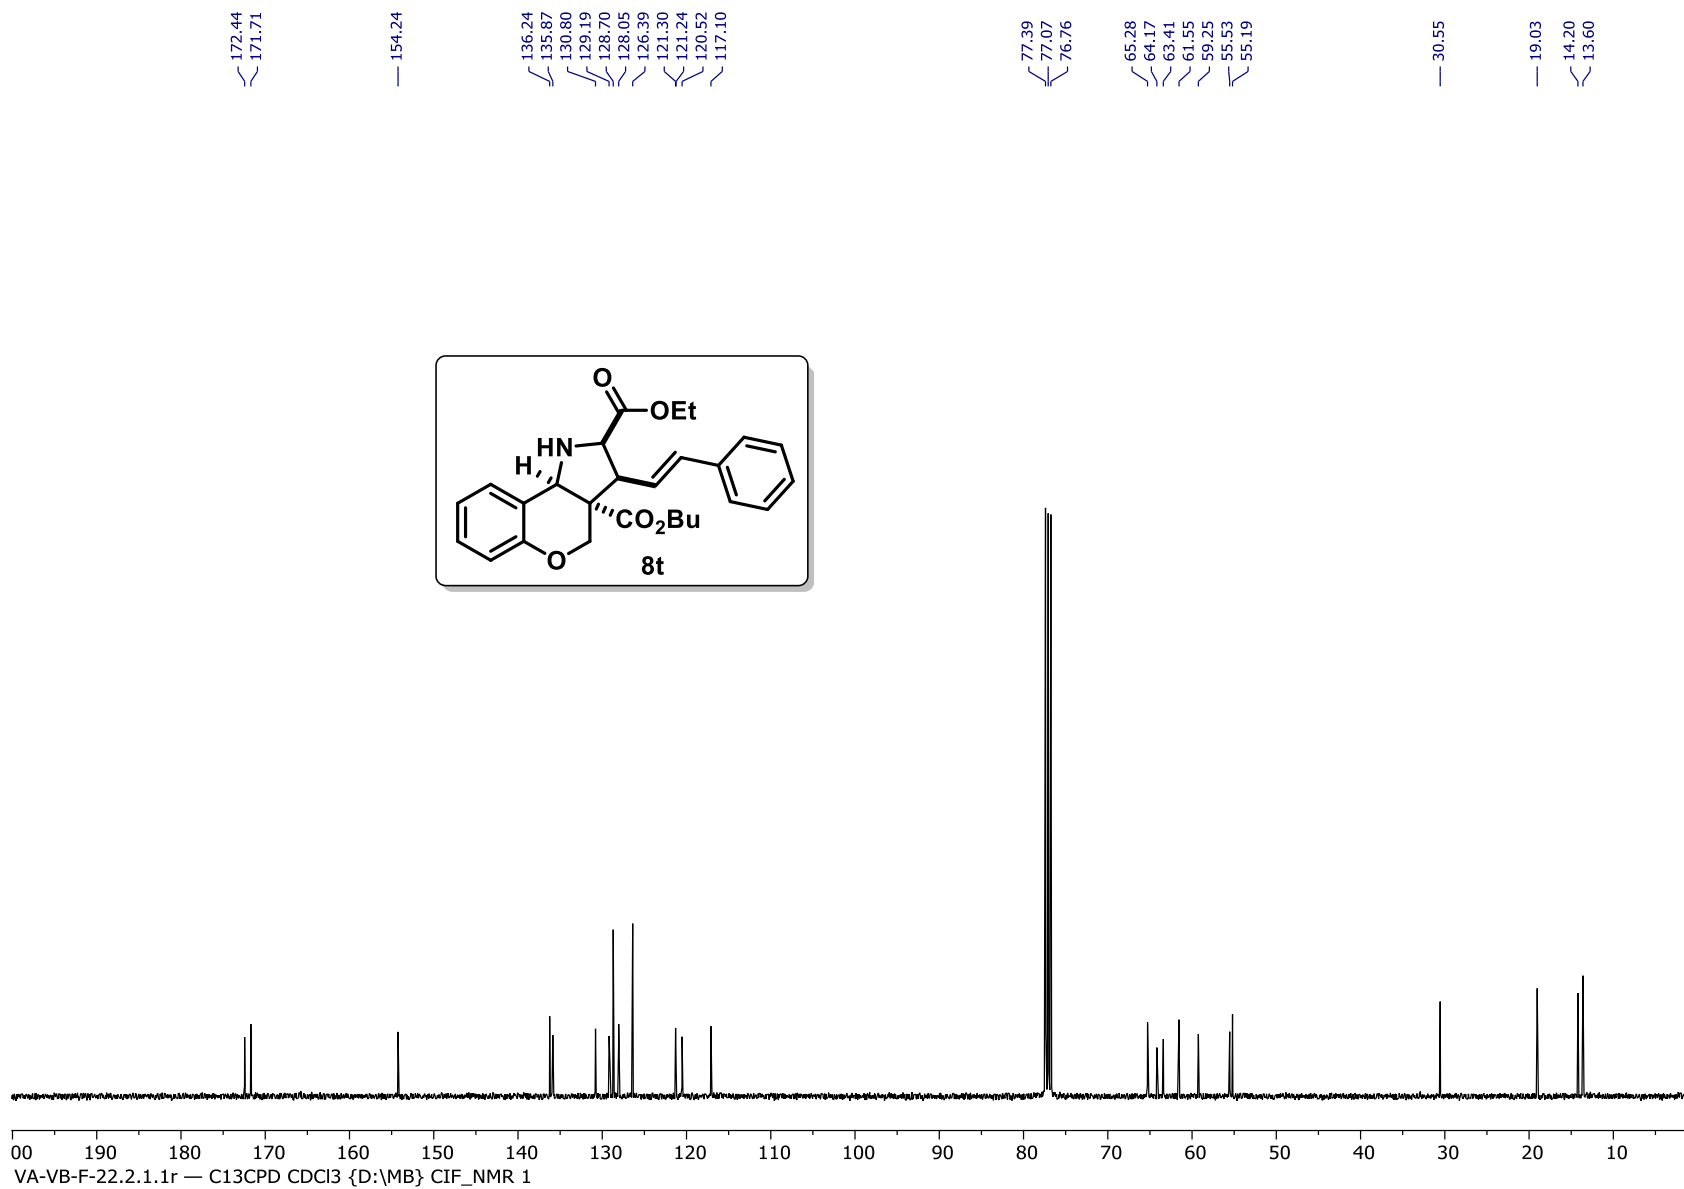



RK-5-Br-CNM-N-165  
 C13CPD CDCl3 {O, MB} 161.86  
 151.50  
 145.22  
 136.26  
 134.82  
 132.43  
 128.87  
 127.78  
 126.56  
 123.40  
 122.39  
 119.12  
 113.78  
 113.54

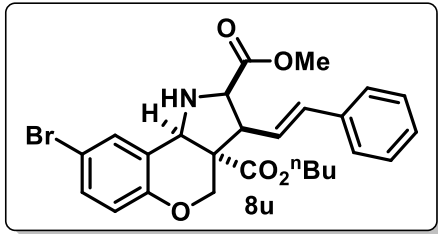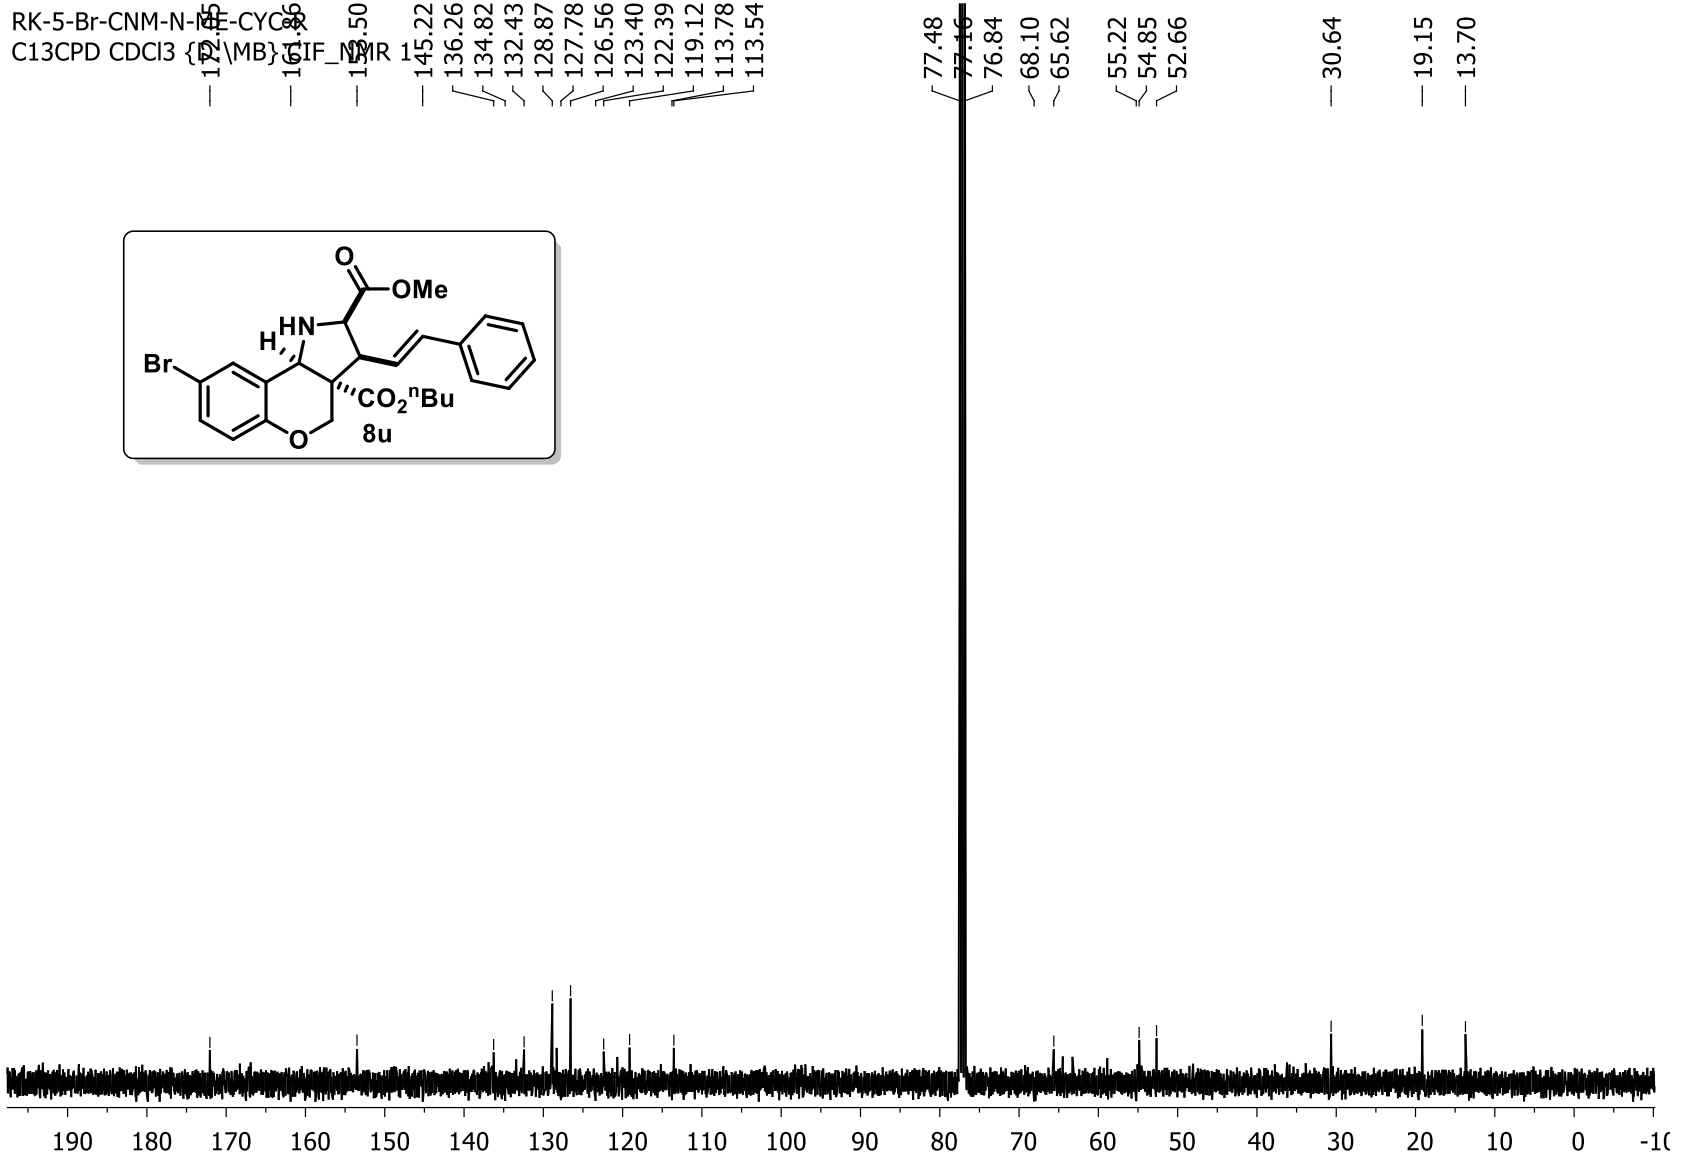

**Dimethyl (E)-2-methyl-3-styryl-1,2,3,9b-tetrahydrochromeno[4,3-b]pyrrole 2,3a(4H)-dicarboxylate (8v)**

7.36  
7.35  
7.34  
7.33  
7.26  
7.25  
7.21  
7.20  
7.19  
7.18  
7.12  
6.88  
6.88  
6.84  
6.84  
6.44  
6.40  
5.76  
5.74  
5.73  
5.70  
4.60  
4.47  
4.45  
4.05  
4.03  
3.61  
3.57  
3.20  
3.17  
1.56

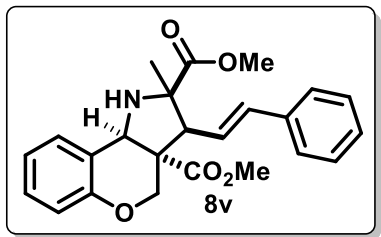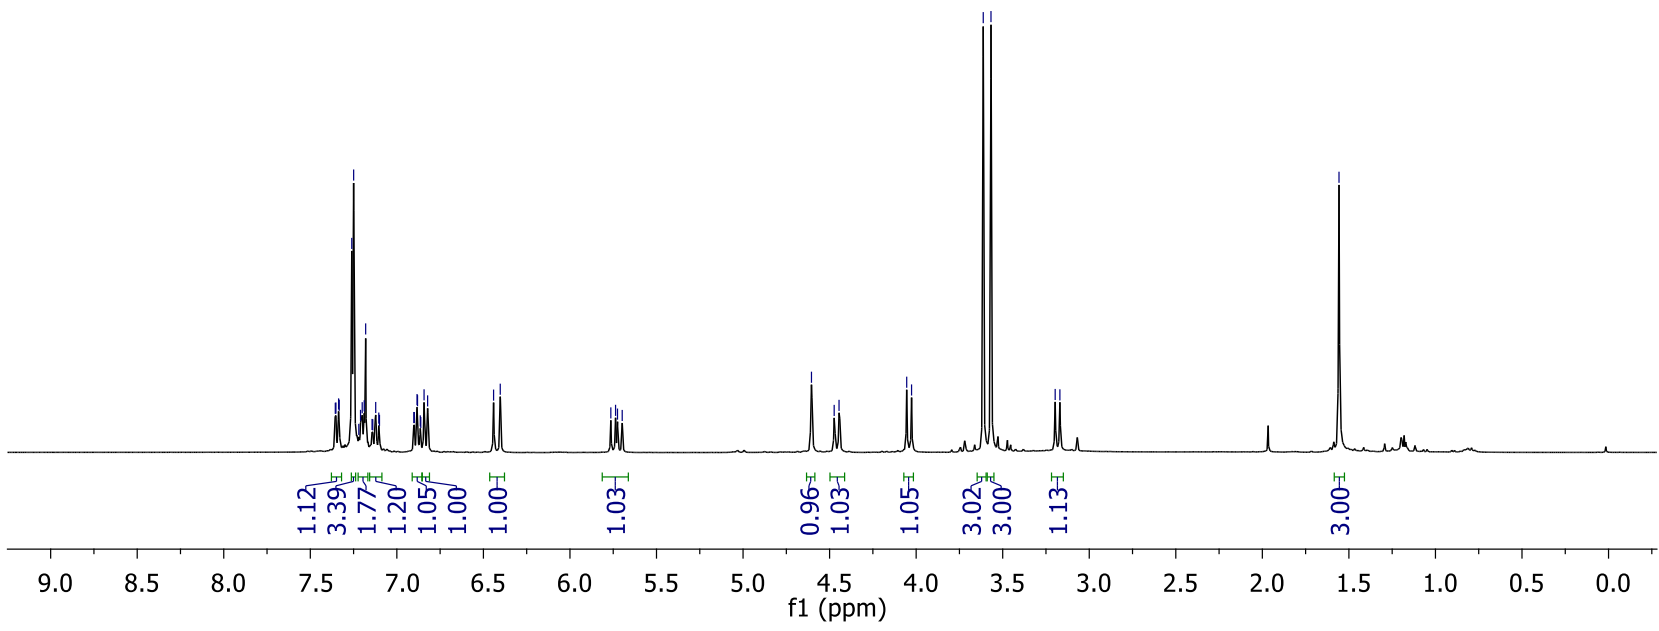

174.67  
172.85

154.23

136.35  
135.55  
130.98  
129.19  
128.77  
128.10  
126.46  
121.38  
121.21  
120.28  
117.16

77.48  
77.16  
76.84  
69.69  
64.94  
63.29  
58.17  
56.82  
52.74  
52.69

26.33

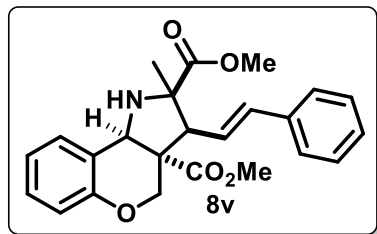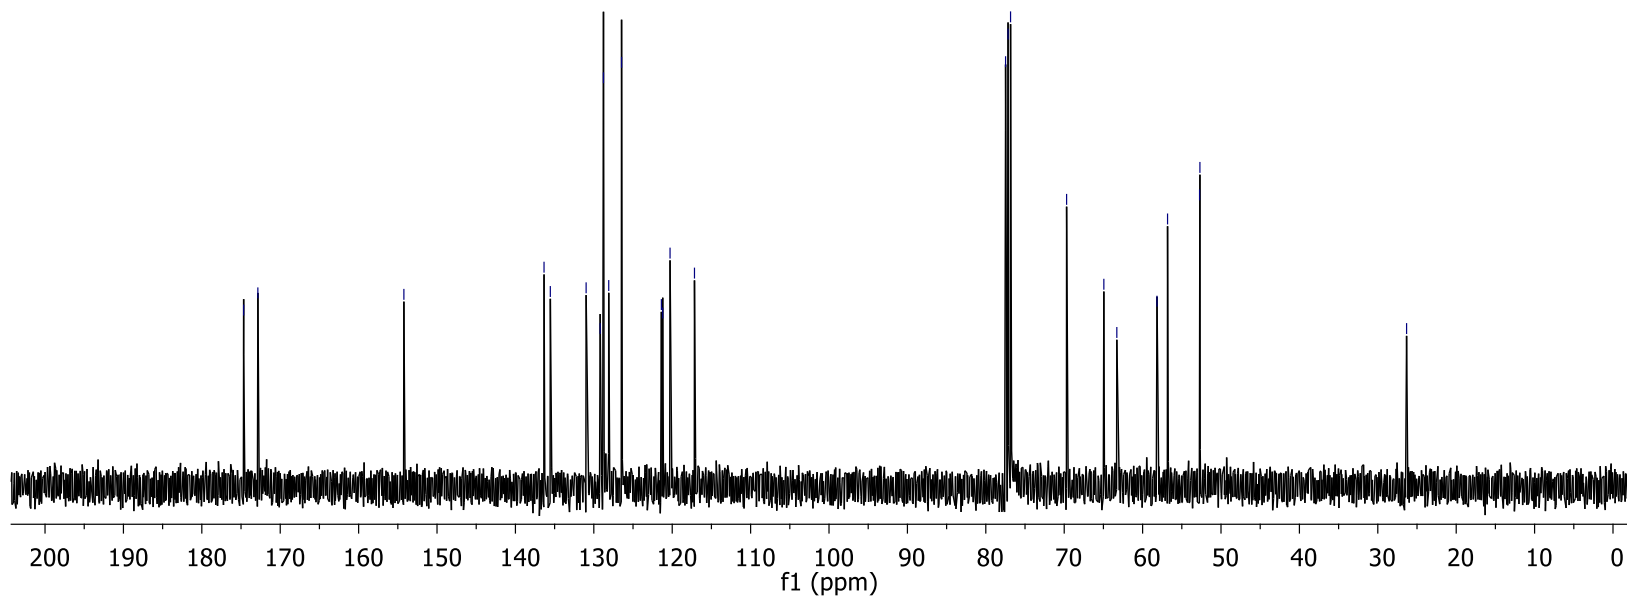

Butyl 2-methyl (*E*)-8-bromo-3-styryl-1,2,3,9b-tetrahydrochromeno[4,3-b]pyrrole 2,3a(4*H*)- dicarboxylate (10)

7.39  
7.38  
7.37  
7.36  
7.36  
7.35  
7.35  
7.34  
7.34  
7.33  
7.32  
7.32  
7.28  
7.28  
7.28  
7.26  
7.26  
6.90  
6.89  
6.88  
6.87  
6.79  
6.78  
6.77  
6.76  
6.47  
6.43  
6.14  
6.12  
6.10  
6.08  
4.84  
4.83  
4.81  
4.81  
4.31  
4.29  
4.29  
4.28  
3.85  
3.85  
3.84  
3.67  
3.30  
3.29  
3.27  
3.26  
3.26  
3.16  
3.14  
3.13  
3.12  
3.11  
3.10  
2.98  
2.97  
2.96  
2.95  
2.95  
2.93  
2.93  
2.10  
2.09  
2.08  
2.08  
2.06  
2.06  
2.05  
2.04  
2.04  
2.03  
2.02  
2.01  
2.01  
2.00  
1.99  
1.99  
1.98  
1.97  
1.96  
1.95  
1.68  
1.66  
1.66  
1.65  
1.65

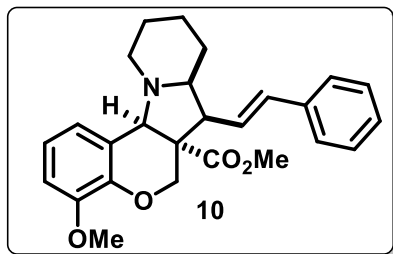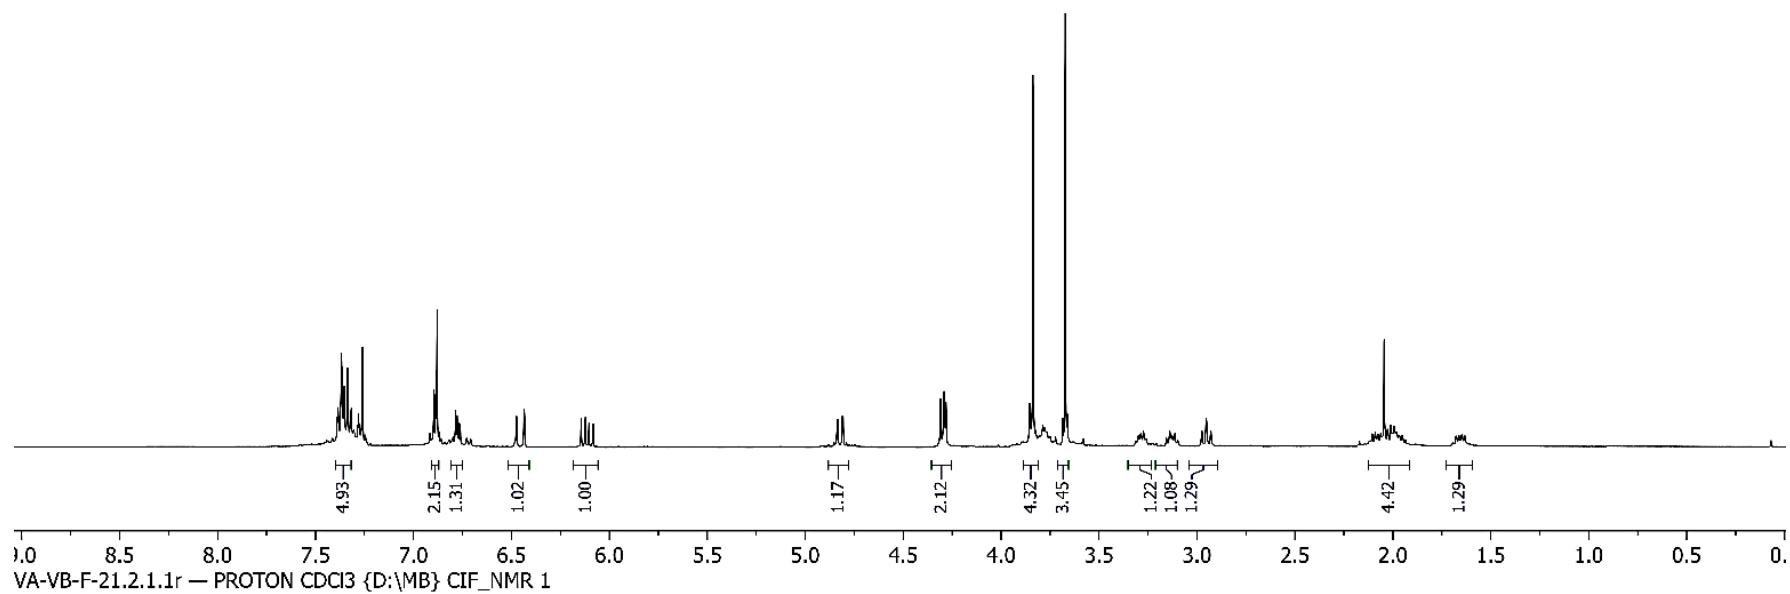

Butyl 2-methyl (*E*)-8-bromo-3-styryl-1,2,3,9b-tetrahydrochromeno[4,3-b]pyrrole 2,3a(4*H*)- dicarboxylate (10)

— 172.36 — 148.64 — 142.91 — 136.65 — 134.12 — 129.60 — 128.78 — 128.03 — 126.57 — 123.63 — 121.21 — 121.07 — 115.50 — 110.94 — 77.47 — 77.16 — 76.84 — 67.96 — 65.91 — 65.07 — 57.18 — 56.85 — 56.07 — 55.69 — 52.73 — 31.25 — 29.81 — 26.83

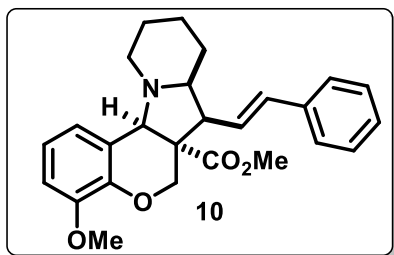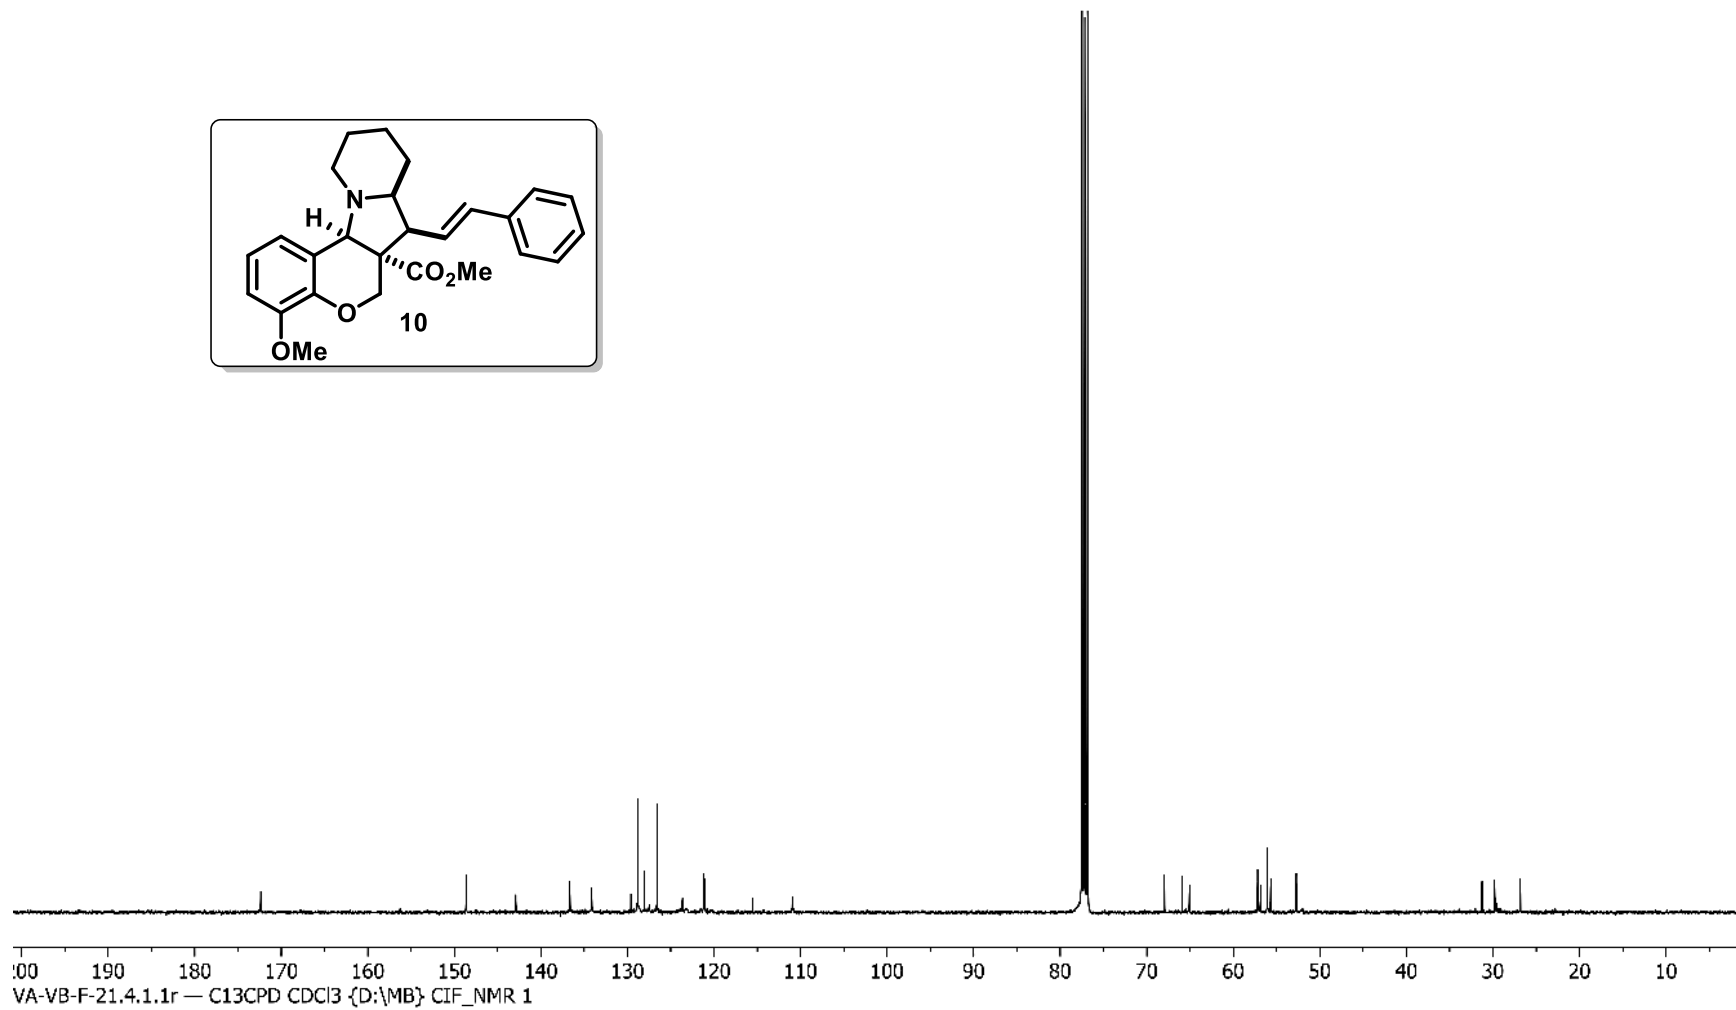



Methyl (*E*)-3a-(hydroxymethyl)-3-styryl-1,2,3,3a,4,9b-hexahydrochromeno[4,3-b]pyrrole-2-carboxylate (11)

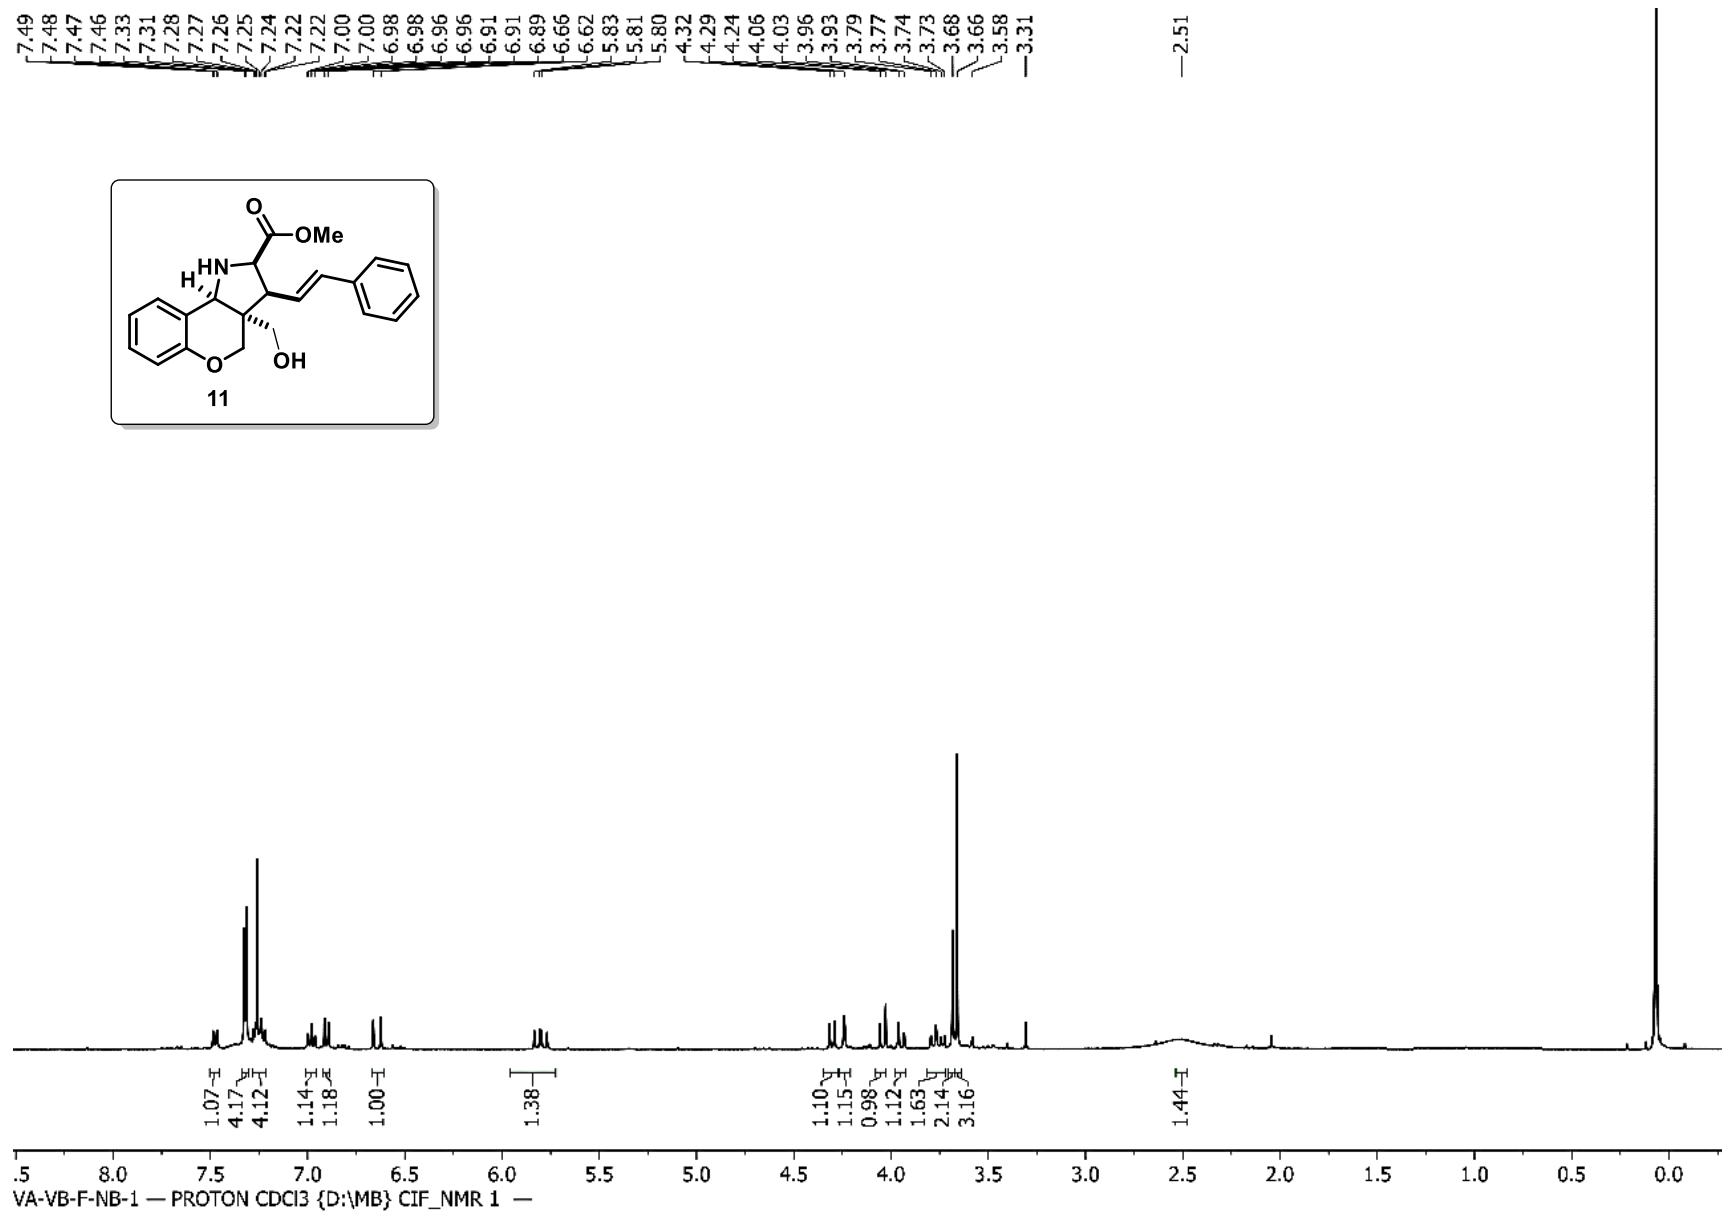

Methyl (*E*)-3a-(hydroxymethyl)-3-styryl-1,2,3,3a,4,9b-hexahydrochromeno[4,3-b]pyrrole-2-carboxylate (11)

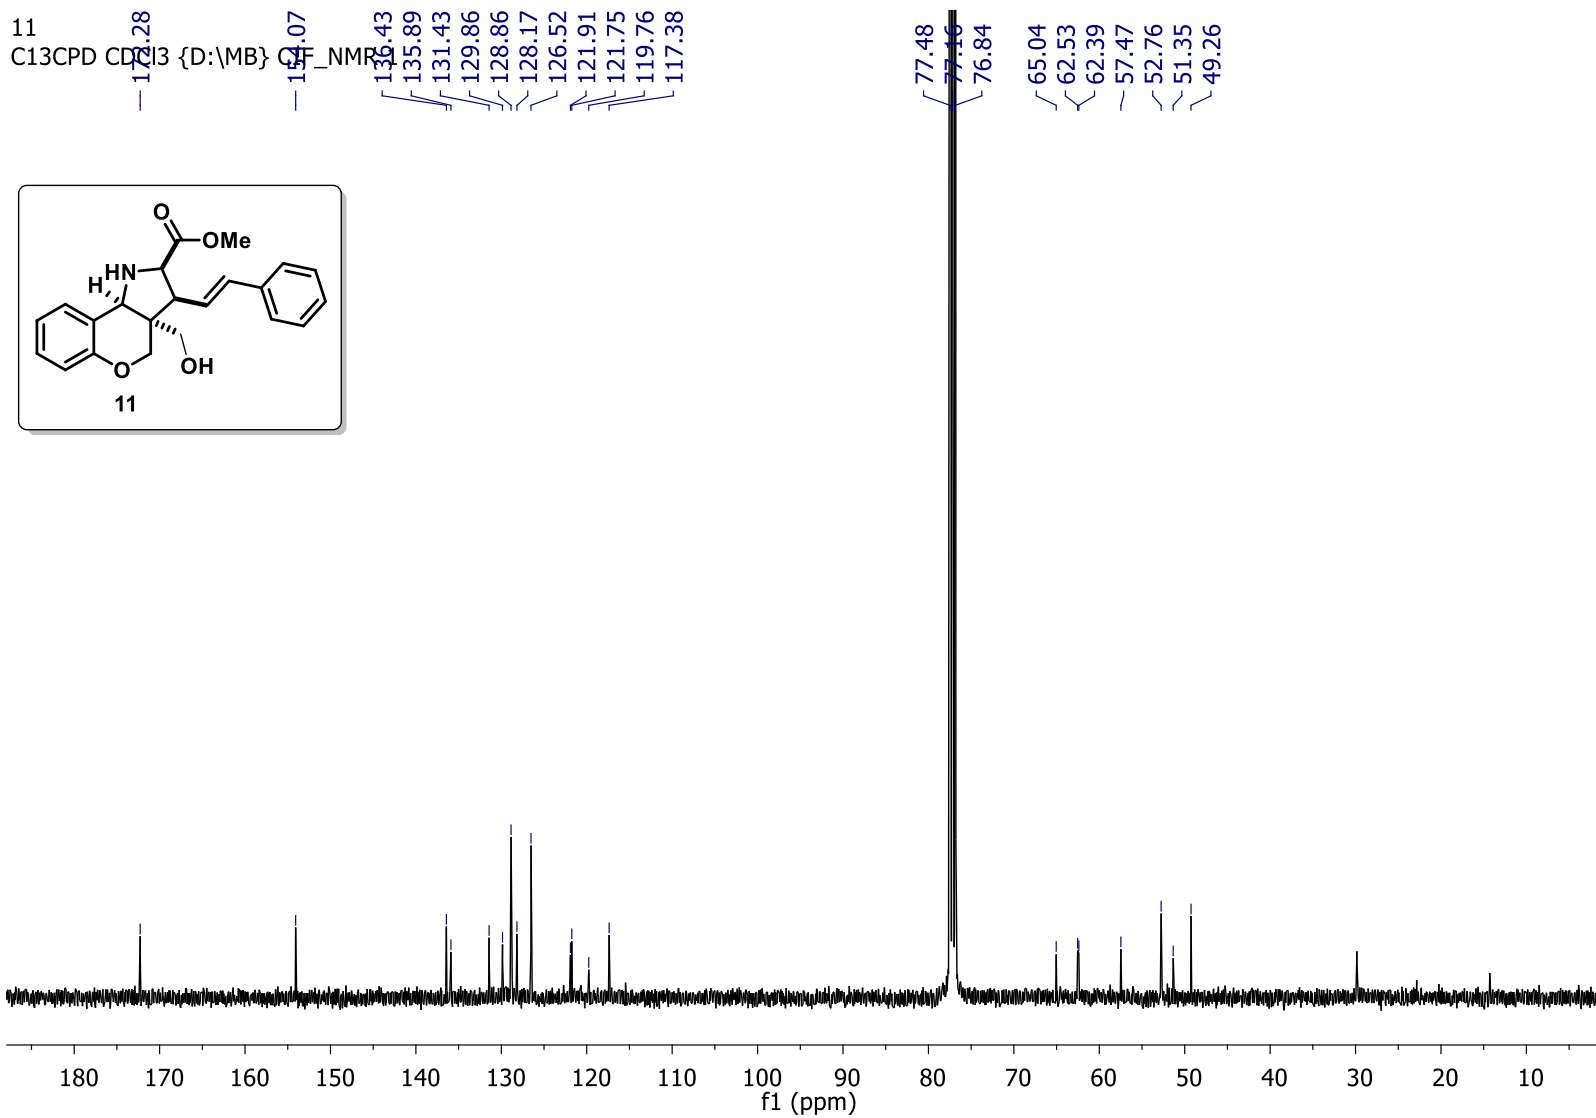

Supplement: d1ob02042k1.pdf [file d1ob02042k1.pdf]
